# Supplementary material for: NOTCH2 variant D1853H is mutated in two non-syndromic premature ovarian insufficiency patients from a Chinese pedigree
Source: J Ovarian Res. 2020 Apr 20;13:41. doi: 10.1186/s13048-020-00645-4 (PMC7171760; doi:10.1186/s13048-020-00645-4)
Supplement: Supplementary file 6 — Additional file 6 Table S3. 404 differentially expressed transcripts bewteen the WM (WT plus Mut groups) and control groups [file 13048_2020_645_MOESM6_ESM.xlsx]

## Sheet: Sheet1
Supplementary Table 3.404 differentially expressed transcripts bewteen the WM (WT plus Mut groups) and control groups
Gene	FoldChange	Log2FoldChange	pval	Up/Down	Significant	GeneName	Biotype	Position	NR:Seq-id	NR:Description	NT:Seq-id	NT:Description	Uniprot:UniProtKB-AC	Uniprot:Score	Uniprot:Evalue	Uniprot:Description	COG:gene	COG:Score	COG:Eval	COG:num	Pfam:pfam_ID	Pfam:pfam_Name	Pfam:pfam_Description	GO:biological_process	GO:cellular_component	GO:molecular_function	KEGG:KO	KEGG:Description
ENSG00000004776	0.556446	-0.845687	0.0105097	down	yes	HSPB6	protein_coding	chr19:35754568-35758079:-	gi|667279980|ref|XP_008573901.1|	PREDICTED: heat shock protein beta-6 [Galeopterus variegatus]	gi|426388313|ref|XM_004060538.1|	PREDICTED: Gorilla gorilla gorilla heat shock protein, alpha-crystallin-related, B6 (HSPB6), mRNA	O14558	228	2e-70	Heat shock protein beta-6	.	.	.	.	pfam00011	HSP20	Hsp20/alpha crystallin family.	GO:0006937|regulation of muscle contraction;	GO:0005737|cytoplasm;GO:0005634|nucleus;	GO:0042803|protein homodimerization activity;GO:0005212|structural constituent of eye lens;	K09545	HSPB6; heat shock protein beta-6
ENSG00000008300	0.651237	-0.618746	5.70283e-31	down	yes	CELSR3	protein_coding	chr3:48636469-48662915:-	gi|145309304|ref|NP_001398.2|	cadherin EGF LAG seven-pass G-type receptor 3 precursor [Homo sapiens]	gi|145309303|ref|NM_001407.2|	Homo sapiens cadherin, EGF LAG seven-pass G-type receptor 3 (CELSR3), mRNA	Q9NYQ7	245	9e-73	Cadherin EGF LAG seven-pass G-type receptor 3	.	.	.	.	pfam12003	DUF3497	Domain of unknown function (DUF3497). This presumed domain is functionally uncharacterized. This domain is found in eukaryotes. This domain is typically between 213 to 257 amino acids in length. This domain is found associated with pfam02793, pfam00002, pfam01825. This domain has a single completely conserved residue W that may be functionally important.	GO:0007413|axonal fasciculation;GO:0042384|cilium assembly;GO:0007186|G-protein coupled receptor signaling pathway;GO:0007156|homophilic cell adhesion via plasma membrane adhesion molecules;GO:0001764|neuron migration;GO:0032880|regulation of protein localization;GO:0001932|regulation of protein phosphorylation;GO:0060071|Wnt signaling pathway, planar cell polarity pathway;	GO:0016021|integral component of membrane;GO:0005886|plasma membrane;	GO:0005509|calcium ion binding;GO:0004930|G-protein coupled receptor activity;	K04602	CELSR3; cadherin EGF LAG seven-pass G-type receptor 3
ENSG00000010379	0.637471	-0.649569	7.80046e-06	down	yes	SLC6A13	protein_coding	chr12:220621-262873:-	gi|530398785|ref|XP_005253806.1|	PREDICTED: sodium- and chloride-dependent GABA transporter 2 isoform X1 [Homo sapiens]	gi|343432608|ref|NM_016615.4|	Homo sapiens solute carrier family 6 (neurotransmitter transporter), member 13 (SLC6A13), transcript variant 1, mRNA	Q9NSD5	235	3e-94	Sodium- and chloride-dependent GABA transporter 2	MJ1319	135	3e-33	COG0733	pfam00209	SNF	Sodium:neurotransmitter symporter family.	GO:0007268|synaptic transmission;GO:0015812|gamma-aminobutyric acid transport;GO:0006836|neurotransmitter transport;	GO:0070062|extracellular exosome;GO:0005887|integral component of plasma membrane;GO:0043005|neuron projection;GO:0005886|plasma membrane;	GO:0005332|gamma-aminobutyric acid:sodium symporter activity;GO:0005328|neurotransmitter:sodium symporter activity;	K05039	SLC6A6S; solute carrier family 6 (neurotransmitter transporter, GABA) member 6/8/11/12/13
ENSG00000015592	0.644999	-0.632632	0.046403	down	yes	STMN4	protein_coding	chr8:27235323-27258420:-	gi|795154460|ref|XP_011839248.1|	PREDICTED: stathmin-4 isoform X1 [Mandrillus leucophaeus]	gi|545688665|ref|NM_030795.3|	Homo sapiens stathmin-like 4 (STMN4), transcript variant 1, mRNA	Q5R4C5	345	2e-116	Stathmin-4	.	.	.	.	pfam00836	Stathmin	Stathmin family. The Stathmin family of proteins play an important role in the regulation of the microtubule cytoskeleton. They regulate microtubule dynamics by promoting depolymerization of microtubules and/or preventing polymerization of tubulin heterodimers.	GO:0031110|regulation of microtubule polymerization or depolymerization;	GO:0030424|axon;GO:0005794|Golgi apparatus;GO:0030426|growth cone;	.	.	.
ENSG00000021488	0.499265	-1.00212	0.00517643	down	yes	SLC7A9	protein_coding	chr19:32830509-32869766:-	gi|694974253|ref|XP_009433505.1|	PREDICTED: B(0,+)-type amino acid transporter 1 isoform X1 [Pan troglodytes]	gi|22535288|gb|BC029802.1|	Homo sapiens solute carrier family 7 (cationic amino acid transporter, y+ system), member 9, mRNA (cDNA clone IMAGE:5182360), with apparent retained intron	P82251	241	3e-112	b(0,+)-type amino acid transporter 1	alr1519	125	4e-30	COG0531	pfam13520	AA_permease_2	Amino acid permease.	GO:0006865|amino acid transport;GO:0015811|L-cystine transport;GO:0050900|leukocyte migration;GO:0015804|neutral amino acid transport;GO:0006461|protein complex assembly;	GO:0016324|apical plasma membrane;GO:0031526|brush border membrane;GO:0005887|integral component of plasma membrane;GO:0005886|plasma membrane;	GO:0015297|antiporter activity;GO:0015184|L-cystine transmembrane transporter activity;GO:0015175|neutral amino acid transmembrane transporter activity;GO:0042605|peptide antigen binding;	K13868	SLC7A9, BAT1; solute carrier family 7 (L-type amino acid transporter), member 9
ENSG00000039987	0.496928	-1.00889	0.000350274	down	yes	BEST2	protein_coding	chr19:12751702-12758458:+	gi|119703742|ref|NP_060152.2|	bestrophin-2 [Homo sapiens]	gi|119703741|ref|NM_017682.2|	Homo sapiens bestrophin 2 (BEST2), mRNA	Q8NFU1	928	0	Bestrophin-2	.	.	.	.	pfam01062	Bestrophin	Bestrophin, RFP-TM, chloride channel. Bestrophin is a 68-kDa basolateral plasma membrane protein expressed in retinal pigment epithelial cells (RPE). It is encoded by the VMD2 gene, which is mutated in Best macular dystrophy, a disease characterized by a depressed light peak in the electrooculogram. VMD2 encodes a 585-amino acid protein with an approximate mass of 68 kDa which has been designated…	GO:1902476|chloride transmembrane transport;GO:0051899|membrane depolarization;GO:0007608|sensory perception of smell;	GO:0034707|chloride channel complex;GO:0005929|cilium;GO:0005887|integral component of plasma membrane;	GO:0005254|chloride channel activity;	K13879	BEST2, VMD2L1; bestrophin-2
ENSG00000041515	2.51647	1.3314	2.88401e-05	up	yes	MYO16	protein_coding	chr13:108596152-109208007:+	gi|29421184|dbj|BAA74888.2|	KIAA0865 protein [Homo sapiens]	gi|312147314|ref|NM_001198950.1|	Homo sapiens myosin XVI (MYO16), transcript variant 1, mRNA	Q9Y6X6	288	2e-88	Unconventional myosin-XVI	YAL029c	339	8e-94	COG5022	pfam00063	Myosin_head	Myosin head (motor domain).	GO:0021549|cerebellum development;GO:0008285|negative regulation of cell proliferation;GO:2000134|negative regulation of G1/S transition of mitotic cell cycle;	GO:0005737|cytoplasm;GO:0016459|myosin complex;GO:0005654|nucleoplasm;GO:0048471|perinuclear region of cytoplasm;GO:0005886|plasma membrane;	GO:0051015|actin filament binding;GO:0005524|ATP binding;GO:0003774|motor activity;	K17481	MYO16; myosin XVI
ENSG00000047936	2.17401	1.12036	0.0163005	up	yes	ROS1	protein_coding	chr6:117288300-117425855:-	gi|19924165|ref|NP_002935.2|	proto-oncogene tyrosine-protein kinase ROS precursor [Homo sapiens]	gi|19924164|ref|NM_002944.2|	Homo sapiens ROS proto-oncogene 1, receptor tyrosine kinase (ROS1), mRNA	P08922	4819	0	Proto-oncogene tyrosine-protein kinase ROS	.	.	.	.	pfam07714	Pkinase_Tyr	Protein tyrosine kinase.	GO:0030154|cell differentiation;GO:0016049|cell growth;GO:0008283|cell proliferation;GO:0002066|columnar/cuboidal epithelial cell development;GO:0010629|negative regulation of gene expression;GO:0038083|peptidyl-tyrosine autophosphorylation;GO:0006468|protein phosphorylation;GO:0070372|regulation of ERK1 and ERK2 cascade;GO:0010966|regulation of phosphate transport;GO:0032006|regulation of TOR si…	GO:0009986|cell surface;GO:0016021|integral component of membrane;GO:0016020|membrane;GO:0048471|perinuclear region of cytoplasm;GO:0005886|plasma membrane;	GO:0005524|ATP binding;GO:0019903|protein phosphatase binding;GO:0004713|protein tyrosine kinase activity;GO:0004714|transmembrane receptor protein tyrosine kinase activity;	K05088	ROS1; proto-oncogene tyrosine-protein kinase ROS [EC:2.7.10.1]
ENSG00000050767	0.636895	-0.650873	0.0177147	down	yes	COL23A1	protein_coding	chr5:178237618-178590555:-	gi|119574218|gb|EAW53833.1|	collagen, type XXIII, alpha 1, isoform CRA_a [Homo sapiens]	gi|196259815|ref|NM_173465.3|	Homo sapiens collagen, type XXIII, alpha 1 (COL23A1), mRNA	Q86Y22	385	2e-122	Collagen alpha-1(XXIII) chain	.	.	.	.	pfam01391	Collagen	Collagen triple helix repeat (20 copies). Members of this family belong to the collagen superfamily. Collagens are generally extracellular structural proteins involved in formation of connective tissue structure. The alignment contains 20 copies of the G-X-Y repeat that forms a triple helix. The first position of the repeat is glycine, the second and third positions can be any residue but are fre…	.	GO:0005581|collagen trimer;GO:0005788|endoplasmic reticulum lumen;GO:0016021|integral component of membrane;GO:0005886|plasma membrane;	.	.	.
ENSG00000060558	1.8726	0.905041	0.0211931	up	yes	GNA15	protein_coding	chr19:3136193-3163769:+	gi|597709771|ref|NP_002059.3|	guanine nucleotide-binding protein subunit alpha-15 [Homo sapiens]	gi|597709770|ref|NM_002068.3|	Homo sapiens guanine nucleotide binding protein (G protein), alpha 15 (Gq class) (GNA15), mRNA	P30679	204	2e-62	Guanine nucleotide-binding protein subunit alpha-15	.	.	.	.	pfam00503	G-alpha	G-protein alpha subunit. G proteins couple receptors of extracellular signals to intracellular signaling pathways. The G protein alpha subunit binds guanyl nucleotide and is a weak GTPase. A set of residues that are unique to G-alpha as compared to its ancestor the Arf-like family form a ring of residues centered on the nucleotide binding site. A Ggamma is found fused to an inactive Galpha in the…	GO:0007202|activation of phospholipase C activity;GO:0060158|phospholipase C-activating dopamine receptor signaling pathway;GO:0007207|phospholipase C-activating G-protein coupled acetylcholine receptor signaling pathway;GO:0030168|platelet activation;GO:0007204|positive regulation of cytosolic calcium ion concentration;	GO:0005834|heterotrimeric G-protein complex;GO:0005886|plasma membrane;	GO:0005525|GTP binding;GO:0003924|GTPase activity;GO:0046872|metal ion binding;GO:0004871|signal transducer activity;	K04637	GNA15; guanine nucleotide-binding protein subunit alpha-15
ENSG00000074803	0.387263	-1.36861	0.0331404	down	yes	SLC12A1	protein_coding	chr15:48191664-48304078:+	gi|134254459|ref|NP_000329.2|	solute carrier family 12 member 1 isoform A [Homo sapiens]	gi|34366641|emb|BX647484.1|	Homo sapiens mRNA; cDNA DKFZp686O14110 (from clone DKFZp686O14110)	Q13621	2110	0	Solute carrier family 12 member 1	YBR235w	85.9	5e-18	COG0531	pfam00324	AA_permease	Amino acid permease.	GO:0034220|ion transmembrane transport;GO:0006811|ion transport;GO:0006813|potassium ion transport;GO:0006814|sodium ion transport;GO:0006810|transport;	GO:0016324|apical plasma membrane;GO:0070062|extracellular exosome;GO:0016021|integral component of membrane;GO:0016020|membrane;GO:0005886|plasma membrane;	GO:0008511|sodium:potassium:chloride symporter activity;	K14425	SLC12A1, NKCC2; solute carrier family 12 (sodium/potassium/chloride transporter), member 1
ENSG00000076344	0.397161	-1.3322	0.0314816	down	yes	RGS11	protein_coding	chr16:268301-275980:-	gi|34452688|ref|NP_899180.1|	regulator of G-protein signaling 11 isoform 1 [Homo sapiens]	gi|62088743|dbj|AB209582.1|	Homo sapiens mRNA for regulator of G-protein signalling 11 isoform 1 variant protein	O94810	457	7e-145	Regulator of G-protein signaling 11	.	.	.	.	pfam00615	RGS	Regulator of G protein signaling domain. RGS family members are GTPase-activating proteins for heterotrimeric G-protein alpha-subunits.	GO:0007186|G-protein coupled receptor signaling pathway;GO:0035556|intracellular signal transduction;GO:0009968|negative regulation of signal transduction;GO:0008277|regulation of G-protein coupled receptor protein signaling pathway;	GO:0005737|cytoplasm;GO:0005834|heterotrimeric G-protein complex;GO:0005886|plasma membrane;GO:0043234|protein complex;	GO:0031681|G-protein beta-subunit binding;GO:0005096|GTPase activator activity;GO:0004871|signal transducer activity;	K16449	RGS; regulator of G-protein signaling
ENSG00000079385	0.262685	-1.9286	0.019771	down	yes	CEACAM1	protein_coding	chr19:42507304-42561234:-	gi|19923195|ref|NP_001703.2|	carcinoembryonic antigen-related cell adhesion molecule 1 isoform 1 precursor [Homo sapiens]	gi|296317298|ref|NM_001712.4|	Homo sapiens carcinoembryonic antigen-related cell adhesion molecule 1 (biliary glycoprotein) (CEACAM1), transcript variant 1, mRNA	P13688	234	1e-73	Carcinoembryonic antigen-related cell adhesion molecule 1	.	.	.	.	pfam13900	GVQW	Putative binding domain. This short domain is often found nested inside other longer domains. The function is not known, but the domain carries a highly conserved GVQW motif. The members are rich in proline and cysteine. This may be a binding domain.	GO:0001525|angiogenesis;GO:0015721|bile acid and bile salt transport;GO:0001568|blood vessel development;GO:0007155|cell adhesion;GO:0016477|cell migration;GO:0098609|cell-cell adhesion;GO:0032869|cellular response to insulin stimulus;GO:0035726|common myeloid progenitor cell proliferation;GO:0038158|granulocyte colony-stimulating factor signaling pathway;GO:0007156|homophilic cell adhesion via p…	GO:0005912|adherens junction;GO:0016324|apical plasma membrane;GO:0009925|basal plasma membrane;GO:0030054|cell junction;GO:0009986|cell surface;GO:0005911|cell-cell junction;GO:0070062|extracellular exosome;GO:0016021|integral component of membrane;GO:0005887|integral component of plasma membrane;GO:0016328|lateral plasma membrane;GO:0016020|membrane;GO:0005886|plasma membrane;GO:0030658|transpo…	GO:0003779|actin binding;GO:0015125|bile acid transmembrane transporter activity;GO:0031005|filamin binding;GO:0019900|kinase binding;GO:0046983|protein dimerization activity;GO:0042803|protein homodimerization activity;GO:0019903|protein phosphatase binding;GO:1990782|protein tyrosine kinase binding;	K06499	CEACAM; carcinoembryonic antigen-related cell adhesion molecule
ENSG00000080166	1.564	0.645244	0.000203114	up	yes	DCT	protein_coding	chr13:94436808-94479682:-	gi|193788640|ref|NP_001123361.1|	L-dopachrome tautomerase isoform 2 precursor [Homo sapiens]	gi|426375773|ref|XM_004054646.1|	PREDICTED: Gorilla gorilla gorilla dopachrome tautomerase, transcript variant 1 (DCT), mRNA	P40126	1056	0	L-dopachrome tautomerase	.	.	.	.	pfam00264	Tyrosinase	Common central domain of tyrosinase. This family also contains polyphenol oxidases and some hemocyanins. Binds two copper ions via two sets of three histidines. This family is related to pfam00372.	GO:0048468|cell development;GO:0048066|developmental pigmentation;GO:0008544|epidermis development;GO:0042438|melanin biosynthetic process;GO:0006583|melanin biosynthetic process from tyrosine;GO:0002052|positive regulation of neuroblast proliferation;GO:0021847|ventricular zone neuroblast division;	GO:0005829|cytosol;GO:0016021|integral component of membrane;GO:0042470|melanosome;GO:0033162|melanosome membrane;	GO:0005507|copper ion binding;GO:0004167|dopachrome isomerase activity;GO:0016491|oxidoreductase activity;	K01827	DCT; dopachrome tautomerase [EC:5.3.3.12]
ENSG00000080573	3.22293	1.68837	1.50385e-60	up	yes	COL5A3	protein_coding	chr19:9959561-10010471:-	gi|110735435|ref|NP_056534.2|	collagen alpha-3(V) chain preproprotein [Homo sapiens]	gi|110735434|ref|NM_015719.3|	Homo sapiens collagen, type V, alpha 3 (COL5A3), mRNA	P25940	149	2e-34	Collagen alpha-3(V) chain	.	.	.	.	pfam01410	COLFI	Fibrillar collagen C-terminal domain. Found at C-termini of fibrillar collagens: Ephydatia muelleri procollagen EMF1 alpha, vertebrate collagens alpha(1)III, alpha(1)II, alpha(2)V etc.	GO:0007160|cell-matrix adhesion;GO:0030574|collagen catabolic process;GO:0030199|collagen fibril organization;GO:0030198|extracellular matrix organization;GO:0043588|skin development;	GO:0005588|collagen type V trimer;GO:0005788|endoplasmic reticulum lumen;GO:0070062|extracellular exosome;GO:0005576|extracellular region;	GO:0005518|collagen binding;GO:0005201|extracellular matrix structural constituent;GO:0008201|heparin binding;GO:0043394|proteoglycan binding;	.	.
ENSG00000081148	0.493669	-1.01838	0.00927266	down	yes	IMPG2	protein_coding	chr3:101222546-101320560:-	gi|57242793|ref|NP_057331.2|	interphotoreceptor matrix proteoglycan 2 precursor [Homo sapiens]	gi|327365364|ref|NM_016247.3|	Homo sapiens interphotoreceptor matrix proteoglycan 2 (IMPG2), mRNA	Q9BZV3	2431	0	Interphotoreceptor matrix proteoglycan 2	.	.	.	.	pfam13900	GVQW	Putative binding domain. This short domain is often found nested inside other longer domains. The function is not known, but the domain carries a highly conserved GVQW motif. The members are rich in proline and cysteine. This may be a binding domain.	GO:0007601|visual perception;	GO:0016021|integral component of membrane;GO:0033165|interphotoreceptor matrix;GO:0005578|proteinaceous extracellular matrix;GO:0043235|receptor complex;	GO:0005201|extracellular matrix structural constituent;GO:0008201|heparin binding;GO:0005540|hyaluronic acid binding;	K19017	IMPG2, SPACRCAN; interphotoreceptor matrix proteoglycan 2
ENSG00000084636	0.546474	-0.871775	0.00383757	down	yes	COL16A1	protein_coding	chr1:31652247-31704319:-	gi|530361825|ref|XP_005270538.1|	PREDICTED: collagen alpha-1(XVI) chain isoform X2 [Homo sapiens]	gi|100913219|ref|NM_001856.3|	Homo sapiens collagen, type XVI, alpha 1 (COL16A1), mRNA	Q07092	137	4e-34	Collagen alpha-1(XVI) chain	.	.	.	.	pfam03154	Atrophin-1	Atrophin-1 family. Atrophin-1 is the protein product of the dentatorubral-pallidoluysian atrophy (DRPLA) gene. DRPLA OMIM:125370 is a progressive neurodegenerative disorder. It is caused by the expansion of a CAG repeat in the DRPLA gene on chromosome 12p. This results in an extended polyglutamine region in atrophin-1, that is thought to confer toxicity to the protein, possibly through altering i…	GO:0007155|cell adhesion;GO:0033627|cell adhesion mediated by integrin;GO:0071230|cellular response to amino acid stimulus;GO:0030198|extracellular matrix organization;GO:0007565|female pregnancy;GO:0033622|integrin activation;GO:0007229|integrin-mediated signaling pathway;GO:0051894|positive regulation of focal adhesion assembly;	GO:0005597|collagen type XVI trimer;GO:0005788|endoplasmic reticulum lumen;GO:0005576|extracellular region;GO:0005578|proteinaceous extracellular matrix;	GO:0005178|integrin binding;	.	.
ENSG00000086967	0.613183	-0.705611	0.0166189	down	yes	MYBPC2	protein_coding	chr19:50432903-50466321:+	gi|133908641|ref|NP_004524.3|	myosin-binding protein C, fast-type [Homo sapiens]	gi|133908640|ref|NM_004533.3|	Homo sapiens myosin binding protein C, fast type (MYBPC2), mRNA	Q14324	2160	0	Myosin-binding protein C, fast-type	.	.	.	.	pfam07679	I-set	Immunoglobulin I-set domain.	GO:0007155|cell adhesion;GO:0030049|muscle filament sliding;	GO:0005829|cytosol;GO:0032982|myosin filament;	GO:0008307|structural constituent of muscle;	K12558	MYBPC2; myosin-binding protein C, fast-type
ENSG00000087589	0.584594	-0.774494	1.11086e-06	down	yes	CASS4	protein_coding	chr20:56412112-56460387:+	gi|55769585|ref|NP_065089.2|	cas scaffolding protein family member 4 isoform a [Homo sapiens]	gi|20379731|gb|BC027951.1|	Homo sapiens Cas scaffolding protein family member 4, mRNA (cDNA clone MGC:34259 IMAGE:5205865), complete cds	Q9NQ75	266	2e-74	Cas scaffolding protein family member 4	SPCC663.04	59.7	8e-10	COG2167	pfam08824	Serine_rich	Serine rich protein interaction domain. This is a serine rich domain that is found in the docking protein p130(cas) (Crk-associated substrate). This domain folds into a four helix bundle which is associated with protein-protein interactions.	GO:0007155|cell adhesion;	GO:0005737|cytoplasm;GO:0005856|cytoskeleton;GO:0005925|focal adhesion;	.	.	.
ENSG00000090382	0.226362	-2.1433	0.0321853	down	yes	LYZ	protein_coding	chr12:69348341-69354234:+	gi|4557894|ref|NP_000230.1|	lysozyme C precursor [Homo sapiens]	gi|169790843|ref|NM_000239.2|	Homo sapiens lysozyme (LYZ), mRNA	P61628	303	9e-100	Lysozyme C	.	.	.	.	pfam00062	Lys	C-type lysozyme/alpha-lactalbumin family. Alpha-lactalbumin is the regulatory subunit of lactose synthase, changing the substrate specificity of galactosyltransferase from N-acetylglucosamine to glucose. C-type lysozymes are secreted bacteriolytic enzymes that cleave the peptidoglycan of bacterial cell walls. Structure is a multi-domain, mixed alpha and beta fold, containing four conserved disulf…	GO:0016998|cell wall macromolecule catabolic process;GO:0019835|cytolysis;GO:0050829|defense response to Gram-negative bacterium;GO:0050830|defense response to Gram-positive bacterium;	GO:0005615|extracellular space;	GO:0003796|lysozyme activity;	K13915	LYZ; lysozyme C [EC:3.2.1.17]
ENSG00000091513	0.480722	-1.05672	5.72322e-06	down	yes	TF	protein_coding	chr3:133745956-133779006:+	gi|767927446|ref|XP_011511402.1|	PREDICTED: serotransferrin isoform X1 [Homo sapiens]	gi|34533629|dbj|AK126941.1|	Homo sapiens cDNA FLJ44994 fis, clone BRAWH3010560	A5A6I6	216	8e-65	Serotransferrin	.	.	.	.	pfam00405	Transferrin	Transferrin.	GO:0006879|cellular iron ion homeostasis;GO:0071281|cellular response to iron ion;GO:0097460|ferrous iron import into cell;GO:0048260|positive regulation of receptor-mediated endocytosis;GO:0001895|retina homeostasis;	GO:0016324|apical plasma membrane;GO:0009925|basal plasma membrane;GO:0072562|blood microparticle;GO:0005905|coated pit;GO:0005769|early endosome;GO:0030139|endocytic vesicle;GO:0070062|extracellular exosome;GO:0031232|extrinsic component of external side of plasma membrane;GO:1990712|HFE-transferrin receptor complex;GO:0005770|late endosome;GO:0048471|perinuclear region of cytoplasm;GO:0055037|r…	GO:0008199|ferric iron binding;GO:0015091|ferric iron transmembrane transporter activity;GO:0008198|ferrous iron binding;	K14736	TF; transferrin
ENSG00000096088	0.338725	-1.56181	0.0496509	down	yes	PGC	protein_coding	chr6:41736711-41754109:-	gi|4505757|ref|NP_002621.1|	gastricsin isoform 1 preproprotein [Homo sapiens]	gi|262206225|ref|NM_002630.3|	Homo sapiens progastricsin (pepsinogen C) (PGC), transcript variant 1, mRNA	P20142	737	0	Gastricsin	.	.	.	.	pfam00026	Asp	Eukaryotic aspartyl protease. Aspartyl (acid) proteases include pepsins, cathepsins, and renins. Two-domain structure, probably arising from ancestral duplication. This family does not include the retroviral nor retrotransposon proteases (pfam00077), which are much smaller and appear to be homologous to a single domain of the eukaryotic asp proteases.	GO:0007586|digestion;GO:0002803|positive regulation of antibacterial peptide production;GO:0030163|protein catabolic process;GO:0006508|proteolysis;	GO:0070062|extracellular exosome;GO:0005615|extracellular space;	GO:0004190|aspartic-type endopeptidase activity;	K01377	PGC; gastricsin [EC:3.4.23.3]
ENSG00000096395	8.09146	3.0164	0.0123902	up	yes	MLN	protein_coding	chr6:33794673-33804011:-	gi|635095739|ref|XP_007971099.1|	PREDICTED: promotilin isoform X2 [Chlorocebus sabaeus]	gi|92091581|ref|NM_002418.2|	Homo sapiens motilin (MLN), transcript variant 1, mRNA	P12872	199	4e-64	Promotilin	.	.	.	.	pfam04643	Motilin_assoc	Motilin/ghrelin-associated peptide. This family represents a peptide sequence that lies C-terminal to motilin/ghrelin on the respective precursor peptide. Its function is unknown.	GO:0007267|cell-cell signaling;GO:0007186|G-protein coupled receptor signaling pathway;	GO:0005576|extracellular region;	GO:0005102|receptor binding;	K05265	MLN; motilin
ENSG00000100170	0.390264	-1.35748	0.0129379	down	yes	SLC5A1	protein_coding	chr22:32043032-32113029:+	gi|4507031|ref|NP_000334.1|	sodium/glucose cotransporter 1 isoform 1 [Homo sapiens]	gi|291575123|ref|NM_000343.3|	Homo sapiens solute carrier family 5 (sodium/glucose cotransporter), member 1 (SLC5A1), transcript variant 1, mRNA	P13866	377	4e-126	Sodium/glucose cotransporter 1	yidK	120	3e-27	COG4146	pfam00474	SSF	Sodium:solute symporter family. Membership of this family is supported by a significant blast score.	GO:0015758|glucose transport;GO:0008645|hexose transport;GO:0001951|intestinal D-glucose absorption;	GO:0016324|apical plasma membrane;GO:0031526|brush border membrane;GO:0005911|cell-cell junction;GO:0070062|extracellular exosome;GO:0005887|integral component of plasma membrane;GO:0005886|plasma membrane;	GO:0005412|glucose:sodium symporter activity;	K14158	SLC5A1, SGLT1; solute carrier family 5 (sodium/glucose cotransporter), member 1
ENSG00000100362	0.463503	-1.10935	0.00636174	down	yes	PVALB	protein_coding	chr22:36800684-36819479:-	gi|4506335|ref|NP_002845.1|	parvalbumin alpha [Homo sapiens]	gi|55925656|ref|NM_002854.2|	Homo sapiens parvalbumin (PVALB), mRNA	P20472	186	8e-59	Parvalbumin alpha	.	.	.	.	pfam00036	EF-hand_1	EF hand. The EF-hands can be divided into two classes: signaling proteins and buffering/transport proteins. The first group is the largest and includes the most well-known members of the family such as calmodulin, troponin C and S100B. These proteins typically undergo a calcium-dependent conformational change which opens a target binding site. The latter group is represented by calbindin D9k and …	GO:0051480|cytosolic calcium ion homeostasis;	GO:0005737|cytoplasm;GO:0070062|extracellular exosome;GO:0043025|neuronal cell body;GO:0005634|nucleus;GO:0043234|protein complex;GO:0043195|terminal bouton;	GO:0005509|calcium ion binding;	.	.
ENSG00000101049	0.5621	-0.831101	0.032748	down	yes	SGK2	protein_coding	chr20:43558968-43588237:+	gi|62550736|gb|AAX88805.1|	serum/glucocorticoid regulated kinase 2 [Homo sapiens]	gi|33873539|gb|BC006523.2|	Homo sapiens cDNA clone IMAGE:2988475, containing frame-shift errors	Q9HBY8	705	0	Serine/threonine-protein kinase Sgk2	.	.	.	.	pfam00069	Pkinase	Protein kinase domain.	GO:0006883|cellular sodium ion homeostasis;GO:0035556|intracellular signal transduction;GO:0034220|ion transmembrane transport;GO:0018105|peptidyl-serine phosphorylation;GO:0010765|positive regulation of sodium ion transport;GO:0032411|positive regulation of transporter activity;GO:0006468|protein phosphorylation;GO:0042981|regulation of apoptotic process;GO:0001558|regulation of cell growth;GO:0…	GO:0005829|cytosol;GO:0005622|intracellular;GO:0005634|nucleus;	GO:0005524|ATP binding;GO:0005246|calcium channel regulator activity;GO:0017081|chloride channel regulator activity;GO:0015459|potassium channel regulator activity;GO:0004674|protein serine/threonine kinase activity;GO:0017080|sodium channel regulator activity;	K13303	SGK2; serum/glucocorticoid-regulated kinase 2 [EC:2.7.11.1]
ENSG00000101282	0.591227	-0.758215	0.019689	down	yes	RSPO4	protein_coding	chr20:958452-1002264:-	gi|119631057|gb|EAX10652.1|	R-spondin family, member 4, isoform CRA_a, partial [Homo sapiens]	gi|260064014|ref|NM_001029871.3|	Homo sapiens R-spondin 4 (RSPO4), transcript variant 1, mRNA	Q2I0M5	279	7e-93	R-spondin-4	.	.	.	.	pfam00757	Furin-like	Furin-like cysteine rich region.	GO:0035878|nail development;GO:0030177|positive regulation of Wnt signaling pathway;GO:0016055|Wnt signaling pathway;	GO:0005576|extracellular region;	GO:0008201|heparin binding;	.	.
ENSG00000101306	0.633012	-0.659695	0.017625	down	yes	MYLK2	protein_coding	chr20:31819308-31834689:+	gi|14993776|ref|NP_149109.1|	myosin light chain kinase 2, skeletal/cardiac muscle [Homo sapiens]	gi|166158927|ref|NM_033118.3|	Homo sapiens myosin light chain kinase 2 (MYLK2), mRNA	Q9H1R3	481	6e-162	Myosin light chain kinase 2, skeletal/cardiac muscle	.	.	.	.	pfam00069	Pkinase	Protein kinase domain.	GO:0060048|cardiac muscle contraction;GO:0055008|cardiac muscle tissue morphogenesis;GO:0007274|neuromuscular synaptic transmission;GO:0018107|peptidyl-threonine phosphorylation;GO:0010628|positive regulation of gene expression;GO:0046777|protein autophosphorylation;GO:0032971|regulation of muscle filament sliding;GO:0035914|skeletal muscle cell differentiation;GO:0014816|skeletal muscle satellit…	GO:0005737|cytoplasm;GO:0005634|nucleus;GO:0030017|sarcomere;	GO:0005524|ATP binding;GO:0005516|calmodulin binding;GO:0004683|calmodulin-dependent protein kinase activity;GO:0004687|myosin light chain kinase activity;	K00907	MYLK; myosin-light-chain kinase [EC:2.7.11.18]
ENSG00000101336	0.259533	-1.94601	0.0149214	down	yes	HCK	protein_coding	chr20:32052188-32101856:+	gi|724948171|ref|XP_010351079.1|	PREDICTED: tyrosine-protein kinase HCK [Rhinopithecus roxellana]	gi|287326899|ref|NM_001172133.1|	Homo sapiens HCK proto-oncogene, Src family tyrosine kinase (HCK), transcript variant 4, mRNA	P08631	1048	0	Tyrosine-protein kinase HCK	YAR019c	111	2e-24	COG0515	pfam07714	Pkinase_Tyr	Protein tyrosine kinase.	GO:0007155|cell adhesion;GO:0030154|cell differentiation;GO:0019221|cytokine-mediated signaling pathway;GO:0038096|Fc-gamma receptor signaling pathway involved in phagocytosis;GO:0006954|inflammatory response;GO:0002758|innate immune response-activating signal transduction;GO:0007229|integrin-mediated signaling pathway;GO:0060333|interferon-gamma-mediated signaling pathway;GO:0043299|leukocyte de…	GO:0005901|caveola;GO:0042995|cell projection;GO:0005856|cytoskeleton;GO:0005829|cytosol;GO:0031234|extrinsic component of cytoplasmic side of plasma membrane;GO:0005925|focal adhesion;GO:0005794|Golgi apparatus;GO:0005764|lysosome;GO:0005634|nucleus;GO:0030133|transport vesicle;	GO:0005524|ATP binding;GO:0004715|non-membrane spanning protein tyrosine kinase activity;GO:0004713|protein tyrosine kinase activity;GO:0005102|receptor binding;	K08893	HCK; hemopoietic cell kinase [EC:2.7.10.2]
ENSG00000102387	0.656827	-0.606414	0.000190703	down	yes	TAF7L	protein_coding	chrX:101268253-101293057:-	gi|270483792|ref|NP_079161.3|	transcription initiation factor TFIID subunit 7-like isoform 1 [Homo sapiens]	gi|270483791|ref|NM_024885.3|	Homo sapiens TAF7-like RNA polymerase II, TATA box binding protein (TBP)-associated factor, 50kDa (TAF7L), transcript variant 1, mRNA	Q5H9L4	727	0	Transcription initiation factor TFIID subunit 7-like	SPAC13F5.02c	91.7	8e-19	COG5414	pfam04658	TAFII55_N	TAFII55 protein conserved region. The general transcription factor, TFIID, consists of the TATA-binding protein (TBP) associated with a series of TBP-associated factors (TAFs) that together participate in the assembly of the transcription preinitiation complex. TAFII55 binds to TAFII250 and inhibits it acetyltransferase activity. The exact role of TAFII55 is currently unknown. The conserved regio…	GO:0030154|cell differentiation;GO:0007275|multicellular organismal development;GO:0006357|regulation of transcription from RNA polymerase II promoter;GO:0051123|RNA polymerase II transcriptional preinitiation complex assembly;GO:0007283|spermatogenesis;	GO:0005737|cytoplasm;GO:0005669|transcription factor TFIID complex;	GO:0035035|histone acetyltransferase binding;GO:0003713|transcription coactivator activity;GO:0008134|transcription factor binding;GO:0044212|transcription regulatory region DNA binding;	K03132	TAF7; transcription initiation factor TFIID subunit 7
ENSG00000102904	0.649898	-0.621714	9.62789e-07	down	yes	TSNAXIP1	protein_coding	chr16:67806765-67832148:+	gi|573014785|ref|NP_001275919.1|	translin-associated factor X-interacting protein 1 isoform a [Homo sapiens]	gi|573014751|ref|NM_018430.3|	Homo sapiens translin-associated factor X interacting protein 1 (TSNAXIP1), transcript variant 2, mRNA	Q2TAA8	190	2e-57	Translin-associated factor X-interacting protein 1	.	.	.	.	pfam13900	GVQW	Putative binding domain. This short domain is often found nested inside other longer domains. The function is not known, but the domain carries a highly conserved GVQW motif. The members are rich in proline and cysteine. This may be a binding domain.	GO:0030154|cell differentiation;GO:0007275|multicellular organismal development;GO:0007283|spermatogenesis;	GO:0005737|cytoplasm;GO:0048471|perinuclear region of cytoplasm;	.	.	.
ENSG00000105428	0.334369	-1.58049	0.0366708	down	yes	ZNRF4	protein_coding	chr19:5455431-5456856:+	gi|150170725|ref|NP_859061.3|	zinc/RING finger protein 4 precursor [Homo sapiens]	gi|150170724|ref|NM_181710.3|	Homo sapiens zinc and ring finger 4 (ZNRF4), mRNA	Q8WWF5	739	0	E3 ubiquitin-protein ligase ZNRF4	.	.	.	.	pfam13639	zf-RING_2	Ring finger domain.	GO:0042787|protein ubiquitination involved in ubiquitin-dependent protein catabolic process;	GO:0005789|endoplasmic reticulum membrane;GO:0016021|integral component of membrane;	GO:0016874|ligase activity;GO:0008270|zinc ion binding;	K15715	ZNRF4; Zinc/RING finger protein 4
ENSG00000106560	7.98883	2.99798	0.0432992	up	yes	GIMAP2	protein_coding	chr7:150685697-150693641:+	gi|28416431|ref|NP_056475.1|	GTPase IMAP family member 2 [Homo sapiens]	gi|55774983|ref|NM_015660.2|	Homo sapiens GTPase, IMAP family member 2 (GIMAP2), mRNA	Q6UX73	76.3	1e-18	UPF0764 protein C16orf89	.	.	.	.	pfam04548	AIG1	AIG1 family. Arabidopsis protein AIG1 appears to be involved in plant resistance to bacteria.	.	GO:0005737|cytoplasm;GO:0016021|integral component of membrane;GO:0005811|lipid particle;	GO:0005525|GTP binding;	.	.
ENSG00000110243	0.311961	-1.68056	0.0364619	down	yes	APOA5	protein_coding	chr11:116789367-116792420:-	gi|63079709|ref|NP_443200.2|	apolipoprotein A-V precursor [Homo sapiens]	gi|262231738|ref|NM_052968.4|	Homo sapiens apolipoprotein A-V (APOA5), transcript variant 1, mRNA	Q6Q788	328	2e-111	Apolipoprotein A-V	.	.	.	.	pfam01442	Apolipoprotein	Apolipoprotein A1/A4/E domain. These proteins contain several 22 residue repeats which form a pair of alpha helices. This family includes: Apolipoprotein A-I. Apolipoprotein A-IV, and Apolipoprotein E.	GO:0055090|acylglycerol homeostasis;GO:0006695|cholesterol biosynthetic process;GO:0033344|cholesterol efflux;GO:0042632|cholesterol homeostasis;GO:0034380|high-density lipoprotein particle assembly;GO:0006869|lipid transport;GO:0042157|lipoprotein metabolic process;GO:0031102|neuron projection regeneration;GO:0046470|phosphatidylcholine metabolic process;GO:0033700|phospholipid efflux;GO:0010873…	GO:0072562|blood microparticle;GO:0042627|chylomicron;GO:0005576|extracellular region;GO:0005615|extracellular space;GO:0034364|high-density lipoprotein particle;GO:0034361|very-low-density lipoprotein particle;	GO:0015485|cholesterol binding;GO:0017127|cholesterol transporter activity;GO:0008047|enzyme activator activity;GO:0019899|enzyme binding;GO:0008201|heparin binding;GO:0060229|lipase activator activity;GO:0035473|lipase binding;GO:0008289|lipid binding;GO:0060230|lipoprotein lipase activator activity;GO:0070325|lipoprotein particle receptor binding;GO:0050750|low-density lipoprotein particle rece…	K09025	APOA5; apolipoprotein A-V
ENSG00000113525	0.294266	-1.76481	0.0297848	down	yes	IL5	protein_coding	chr5:132541444-132556838:-	gi|578810324|ref|XP_006714664.1|	PREDICTED: interleukin-5 isoform X2 [Homo sapiens]	gi|155574026|gb|DQ655974.2|	Homo sapiens clone UGL8e03, mRNA sequence	P05113	248	1e-81	Interleukin-5	.	.	.	.	pfam02025	IL5	Interleukin 5.	GO:0019221|cytokine-mediated signaling pathway;GO:0006955|immune response;GO:0006954|inflammatory response;GO:0000165|MAPK cascade;GO:0030890|positive regulation of B cell proliferation;GO:0045645|positive regulation of eosinophil differentiation;GO:0051024|positive regulation of immunoglobulin secretion;GO:0046427|positive regulation of JAK-STAT cascade;GO:0050731|positive regulation of peptidyl…	GO:0005576|extracellular region;GO:0005615|extracellular space;GO:0005622|intracellular;	GO:0005125|cytokine activity;GO:0005137|interleukin-5 receptor binding;GO:0004713|protein tyrosine kinase activity;GO:0005088|Ras guanyl-nucleotide exchange factor activity;	K05428	IL5; interleukin 5
ENSG00000114349	0.513922	-0.960378	0.0432162	down	yes	GNAT1	protein_coding	chr3:50191612-50196516:+	gi|22027520|ref|NP_000163.2|	guanine nucleotide-binding protein G(t) subunit alpha-1 [Homo sapiens]	gi|223717996|ref|NM_144499.2|	Homo sapiens guanine nucleotide binding protein (G protein), alpha transducing activity polypeptide 1 (GNAT1), transcript variant 1, mRNA	P11488	697	0	Guanine nucleotide-binding protein G(t) subunit alpha-1	.	.	.	.	pfam00503	G-alpha	G-protein alpha subunit. G proteins couple receptors of extracellular signals to intracellular signaling pathways. The G protein alpha subunit binds guanyl nucleotide and is a weak GTPase. A set of residues that are unique to G-alpha as compared to its ancestor the Arf-like family form a ring of residues centered on the nucleotide binding site. A Ggamma is found fused to an inactive Galpha in the…	GO:0007188|adenylate cyclase-modulating G-protein coupled receptor signaling pathway;GO:0008283|cell proliferation;GO:0071257|cellular response to electrical stimulus;GO:0050908|detection of light stimulus involved in visual perception;GO:0042462|eye photoreceptor cell development;GO:0007603|phototransduction, visible light;GO:0009416|response to light stimulus;GO:0060041|retina development in ca…	GO:0005834|heterotrimeric G-protein complex;GO:0016020|membrane;GO:0032391|photoreceptor connecting cilium;GO:0001917|photoreceptor inner segment;GO:0001750|photoreceptor outer segment;	GO:0031683|G-protein beta/gamma-subunit complex binding;GO:0001664|G-protein coupled receptor binding;GO:0005525|GTP binding;GO:0003924|GTPase activity;GO:0046872|metal ion binding;GO:0004871|signal transducer activity;	K04631	GNAT; guanine nucleotide-binding protein G(t) subunit alpha
ENSG00000115257	0.650893	-0.619507	3.78658e-13	down	yes	PCSK4	protein_coding	chr19:1481428-1490752:-	gi|76443679|ref|NP_060043.2|	proprotein convertase subtilisin/kexin type 4 preproprotein [Homo sapiens]	gi|148753376|gb|BC142942.1|	Homo sapiens cDNA clone IMAGE:8860322	Q6UW60	212	4e-73	Proprotein convertase subtilisin/kexin type 4	SPAC22E12.09c_1	110	2e-50	COG1404	pfam00082	Peptidase_S8	Subtilase family. Subtilases are a family of serine proteases. They appear to have independently and convergently evolved an Asp/Ser/His catalytic triad, like that found in the trypsin serine proteases (see pfam00089). Structure is an alpha/beta fold containing a 7-stranded parallel beta sheet, order 2314567.	GO:0007340|acrosome reaction;GO:0007339|binding of sperm to zona pellucida;GO:0009566|fertilization;GO:0016485|protein processing;GO:0022414|reproductive process;GO:0048240|sperm capacitation;	GO:0002080|acrosomal membrane;GO:0001669|acrosomal vesicle;GO:0005615|extracellular space;GO:0016021|integral component of membrane;	GO:0004252|serine-type endopeptidase activity;	K08671	PCSK4; proprotein convertase subtilisin/kexin type 4 [EC:3.4.21.-]
ENSG00000115386	0.335558	-1.57536	0.0176656	down	yes	REG1A	protein_coding	chr2:79120362-79123419:+	gi|29725633|ref|NP_002900.2|	lithostathine-1-alpha precursor [Homo sapiens]	gi|164691859|dbj|AK307292.1|	Homo sapiens cDNA, FLJ97240	P05451	349	1e-120	Lithostathine-1-alpha	.	.	.	.	pfam00059	Lectin_C	Lectin C-type domain. This family includes both long and short form C-type	GO:0008284|positive regulation of cell proliferation;	GO:0070062|extracellular exosome;	GO:0030246|carbohydrate binding;GO:0008083|growth factor activity;	.	.
ENSG00000116147	0.321973	-1.63499	0.0255987	down	yes	TNR	protein_coding	chr1:175315194-175743770:-	gi|157384973|ref|NP_003276.3|	tenascin-R precursor [Homo sapiens]	gi|2204202|emb|Z94057.1|	Human DNA sequence from clone RP3-518E13 on chromosome 1q25, complete sequence	Q92752	2781	0	Tenascin-R	.	.	.	.	pfam00147	Fibrinogen_C	Fibrinogen beta and gamma chains, C-terminal globular domain.	GO:0008306|associative learning;GO:0007411|axon guidance;GO:0007155|cell adhesion;GO:0030198|extracellular matrix organization;GO:0035641|locomotory exploration behavior;GO:0060291|long-term synaptic potentiation;GO:0048692|negative regulation of axon extension involved in regeneration;GO:0022408|negative regulation of cell-cell adhesion;GO:0050805|negative regulation of synaptic transmission;GO:…	GO:0009986|cell surface;GO:0005737|cytoplasm;GO:0005576|extracellular region;GO:0045121|membrane raft;GO:0005654|nucleoplasm;GO:0005634|nucleus;GO:0072534|perineuronal net;GO:0005578|proteinaceous extracellular matrix;	.	K06252	TN; tenascin
ENSG00000116882	0.488949	-1.03224	0.0454558	down	yes	HAO2	protein_coding	chr1:119368779-119394130:+	gi|666335628|ref|NP_001005783.2|	hydroxyacid oxidase 2 isoform 2 [Homo sapiens]	gi|194390065|dbj|AK298289.1|	Homo sapiens cDNA FLJ60761 complete cds, highly similar to Hydroxyacid oxidase 2 (EC 1.1.3.15)	Q9NYQ3	724	0	Hydroxyacid oxidase 2	mll4732	120	5e-31	COG1304	pfam01070	FMN_dh	FMN-dependent dehydrogenase.	GO:0044255|cellular lipid metabolic process;GO:0019395|fatty acid oxidation;	GO:0070062|extracellular exosome;GO:0005739|mitochondrion;GO:0005782|peroxisomal matrix;GO:0005777|peroxisome;	GO:0003973|(S)-2-hydroxy-acid oxidase activity;GO:0010181|FMN binding;GO:0052853|long-chain-(S)-2-hydroxy-long-chain-acid oxidase activity;GO:0052854|medium-chain-(S)-2-hydroxy-acid oxidase activity;GO:0005102|receptor binding;GO:0052852|very-long-chain-(S)-2-hydroxy-acid oxidase activity;	K11517	HAO; (S)-2-hydroxy-acid oxidase [EC:1.1.3.15]
ENSG00000118972	0.504938	-0.985821	0.0470144	down	yes	FGF23	protein_coding	chr12:4368227-4379728:-	gi|635062797|ref|XP_007965465.1|	PREDICTED: fibroblast growth factor 23 [Chlorocebus sabaeus]	gi|15055547|ref|NM_020638.2|	Homo sapiens fibroblast growth factor 23 (FGF23), mRNA	Q9GZV9	527	5e-179	Fibroblast growth factor 23	.	.	.	.	pfam00167	FGF	Fibroblast growth factor. Fibroblast growth factors are a family of proteins involved in growth and differentiation in a wide range of contexts. They are found in a wide range of organisms, from nematodes to humans. Most share an internal core region of high similarity, conserved residues in which are involved in binding with their receptors. On binding, they cause dimerization of their tyrosine …	GO:0030154|cell differentiation;GO:0030643|cellular phosphate ion homeostasis;GO:0071354|cellular response to interleukin-6;GO:0044320|cellular response to leptin stimulus;GO:0071374|cellular response to parathyroid hormone stimulus;GO:0071305|cellular response to vitamin D;GO:0008543|fibroblast growth factor receptor signaling pathway;GO:0000165|MAPK cascade;GO:0030502|negative regulation of bon…	GO:0005576|extracellular region;GO:0005615|extracellular space;GO:0005796|Golgi lumen;	GO:0016303|1-phosphatidylinositol-3-kinase activity;GO:0046934|phosphatidylinositol-4,5-bisphosphate 3-kinase activity;GO:0004713|protein tyrosine kinase activity;GO:0005088|Ras guanyl-nucleotide exchange factor activity;	K04358	FGF; fibroblast growth factor
ENSG00000122735	0.579797	-0.786381	0.00532169	down	yes	DNAI1	protein_coding	chr9:34457414-34520989:+	gi|526479830|ref|NP_001268357.1|	dynein intermediate chain 1, axonemal isoform 2 [Homo sapiens]	gi|526479829|ref|NM_001281428.1|	Homo sapiens dynein, axonemal, intermediate chain 1 (DNAI1), transcript variant 2, mRNA	Q5XIL8	64.3	8e-12	Dynein intermediate chain 1, axonemal	.	.	.	.	pfam00400	WD40	WD domain, G-beta repeat.	GO:0003341|cilium movement;GO:0007368|determination of left/right symmetry;GO:0030317|sperm motility;GO:0036158|outer dynein arm assembly;	GO:0005929|cilium;GO:0005737|cytoplasm;GO:0005856|cytoskeleton;GO:0005874|microtubule;GO:0036157|outer dynein arm;	GO:0003774|motor activity;	K10409	DNAI1; dynein intermediate chain 1, axonemal
ENSG00000124664	0.44865	-1.15634	0.0162153	down	yes	SPDEF	protein_coding	chr6:34537802-34556333:-	gi|767939654|ref|XP_005249045.2|	PREDICTED: SAM pointed domain-containing Ets transcription factor isoform X1 [Homo sapiens]	gi|356582510|ref|NM_012391.2|	Homo sapiens SAM pointed domain containing ETS transcription factor (SPDEF), transcript variant 1, mRNA	O95238	633	0	SAM pointed domain-containing Ets transcription factor	.	.	.	.	pfam00178	Ets	Ets-domain.	GO:0030154|cell differentiation;GO:0060576|intestinal epithelial cell development;GO:0060480|lung goblet cell differentiation;GO:0007275|multicellular organismal development;GO:0010454|negative regulation of cell fate commitment;GO:0000122|negative regulation of transcription from RNA polymerase II promoter;GO:0043065|positive regulation of apoptotic process;GO:0010455|positive regulation of cell…	GO:0005634|nucleus;	GO:0000981|RNA polymerase II transcription factor activity, sequence-specific DNA binding;GO:0043565|sequence-specific DNA binding;	K09442	SPDEF; SAM pointed domain-containing ETS transcription factor
ENSG00000127561	0.654977	-0.610483	1.4619e-07	down	yes	SYNGR3	protein_coding	chr16:1989660-1994275:+	gi|426380797|ref|XP_004057047.1|	PREDICTED: synaptogyrin-3 [Gorilla gorilla gorilla]	gi|313661368|ref|NM_004209.5|	Homo sapiens synaptogyrin 3 (SYNGR3), mRNA	O43761	144	4e-41	Synaptogyrin-3	.	.	.	.	pfam01284	MARVEL	Membrane-associating domain. MARVEL domain-containing proteins are often found in lipid-associating proteins - such as Occludin and MAL family proteins. It may be part of the machinery of membrane apposition events, such as transport vesicle biogenesis.	GO:0032411|positive regulation of transporter activity;GO:0021762|substantia nigra development;	GO:0030054|cell junction;GO:0016021|integral component of membrane;GO:0031594|neuromuscular junction;GO:0008021|synaptic vesicle;GO:0030672|synaptic vesicle membrane;	.	.	.
ENSG00000128262	0.613772	-0.704225	0.0162828	down	yes	POM121L9P	transcribed_unprocessed_pseudogene	chr22:24251828-24265525:+	gi|194380886|dbj|BAG64011.1|	unnamed protein product [Homo sapiens]	gi|156713452|ref|NR_003714.1|	Homo sapiens POM121 transmembrane nucleoporin-like 9, pseudogene (POM121L9P), non-coding RNA	Q3SYA9	55.1	4e-06	Putative POM121-like protein 1	.	.	.	.	pfam15229	POM121	POM121 family.	.	.	.	.	.
ENSG00000128285	0.177743	-2.49214	0.0289605	down	yes	MCHR1	protein_coding	chr22:40678750-40682814:+	gi|60115704|ref|NP_001012440.1|	melanin-concentrating hormone receptor 1 [Pan troglodytes]	gi|54633543|gb|AF490537.2|	Homo sapiens G protein-coupled receptor 24 (GPR24) mRNA, complete cds	Q5IJ49	662	0	Melanin-concentrating hormone receptor 1	.	.	.	.	pfam00001	7tm_1	7 transmembrane receptor (rhodopsin family). This family contains, amongst other G-protein-coupled receptors (GCPRs), members of the opsin family, which have been considered to be typical members of the rhodopsin superfamily. They share several motifs, mainly the seven transmembrane helices, GCPRs of the rhodopsin superfamily. All opsins bind a chromophore, such as 11-cis-retinal. The function of…	GO:0007166|cell surface receptor signaling pathway;	GO:0005887|integral component of plasma membrane;	GO:0030273|melanin-concentrating hormone receptor activity;GO:0008188|neuropeptide receptor activity;	K04320	MCHR1; melanin-concentrating hormone receptor 1
ENSG00000128652	1.65269	0.724816	0.0479478	up	yes	HOXD3	protein_coding	chr2:176136612-176173102:+	gi|19923391|ref|NP_008829.3|	homeobox protein Hox-D3 [Homo sapiens]	gi|23510372|ref|NM_006898.4|	Homo sapiens homeobox D3 (HOXD3), mRNA	P31249	206	2e-63	Homeobox protein Hox-D3	.	.	.	.	pfam13293	DUF4074	Domain of unknown function (DUF4074). This family is found at the C-terminal of Homeobox proteins in Metazoa.	GO:0009952|anterior/posterior pattern specification;GO:0051216|cartilage development;GO:0007160|cell-matrix adhesion;GO:0048704|embryonic skeletal system morphogenesis;GO:0021615|glossopharyngeal nerve morphogenesis;GO:0007219|Notch signaling pathway;GO:0010628|positive regulation of gene expression;GO:0045666|positive regulation of neuron differentiation;GO:0030878|thyroid gland development;GO:0…	GO:0016235|aggresome;GO:0005654|nucleoplasm;GO:0005634|nucleus;	GO:0043565|sequence-specific DNA binding;GO:0003700|transcription factor activity, sequence-specific DNA binding;	K09303	HOX_3; homeobox protein HoxA/B/D3
ENSG00000130055	0.460216	-1.11962	0.0266358	down	yes	GDPD2	protein_coding	chrX:70423031-70433390:+	gi|284055242|ref|NP_001164663.1|	glycerophosphoinositol inositolphosphodiesterase GDPD2 isoform 1 [Homo sapiens]	gi|284055241|ref|NM_001171192.1|	Homo sapiens glycerophosphodiester phosphodiesterase domain containing 2 (GDPD2), transcript variant 1, mRNA	Q9HCC8	811	0	Glycerophosphoinositol inositolphosphodiesterase GDPD2	PA2352	84	2e-16	COG0584	pfam03009	GDPD	Glycerophosphoryl diester phosphodiesterase family. Escherichia coli has two sequence related isozymes of glycerophosphoryl diester phosphodiesterase (GDPD) - periplasmic and cytosolic. This family also includes agrocinopine synthase, the similarity to GDPD has been noted. This family appears to have weak but not significant matches to mammalian phospholipase C pfam00388, which suggests that this…	GO:0090527|actin filament reorganization;GO:0006629|lipid metabolic process;GO:0045669|positive regulation of osteoblast differentiation;	GO:0005884|actin filament;GO:0005737|cytoplasm;GO:0016021|integral component of membrane;GO:0030027|lamellipodium;GO:0005886|plasma membrane;	GO:0008889|glycerophosphodiester phosphodiesterase activity;GO:0047394|glycerophosphoinositol inositolphosphodiesterase activity;GO:0046872|metal ion binding;	K01124	GDPD2; glycerophosphoinositol inositolphosphodiesterase [EC:3.1.4.43]
ENSG00000131914	0.280388	-1.8345	0.00294349	down	yes	LIN28A	protein_coding	chr1:26410778-26429722:+	gi|13375938|ref|NP_078950.1|	protein lin-28 homolog A [Homo sapiens]	gi|94536796|ref|NM_024674.4|	Homo sapiens lin-28 homolog A (C. elegans) (LIN28A), mRNA	Q9H9Z2	379	4e-120	Protein lin-28 homolog A	TM1874	58.5	3e-09	COG1278	pfam13900	GVQW	Putative binding domain. This short domain is often found nested inside other longer domains. The function is not known, but the domain carries a highly conserved GVQW motif. The members are rich in proline and cysteine. This may be a binding domain.	GO:0007281|germ cell development;GO:0010587|miRNA catabolic process;GO:0045686|negative regulation of glial cell differentiation;GO:0017148|negative regulation of translation;GO:1901724|positive regulation of cell proliferation involved in kidney development;GO:0045666|positive regulation of neuron differentiation;GO:0045727|positive regulation of translation;GO:0031054|pre-miRNA processing;GO:00…	GO:0005737|cytoplasm;GO:0000932|cytoplasmic mRNA processing body;GO:0010494|cytoplasmic stress granule;GO:0005829|cytosol;GO:0005730|nucleolus;GO:0005634|nucleus;GO:0005791|rough endoplasmic reticulum;	GO:0003677|DNA binding;GO:0002151|G-quadruplex RNA binding;GO:0035198|miRNA binding;GO:0003723|RNA binding;GO:1990825|sequence-specific mRNA binding;GO:0008270|zinc ion binding;	K18754	LIN28; protein lin-28
ENSG00000132010	0.119647	-3.06314	0.00672342	down	yes	ZNF20	protein_coding	chr19:12092843-12140407:-	gi|116875829|ref|NP_066966.2|	zinc finger protein 20 isoform 1 [Homo sapiens]	gi|322303716|ref|NM_021143.3|	Homo sapiens zinc finger protein 20 (ZNF20), transcript variant 1, mRNA	P17024	353	3e-118	Zinc finger protein 20	.	.	.	.	pfam13900	GVQW	Putative binding domain. This short domain is often found nested inside other longer domains. The function is not known, but the domain carries a highly conserved GVQW motif. The members are rich in proline and cysteine. This may be a binding domain.	GO:0006355|regulation of transcription, DNA-templated;GO:0006351|transcription, DNA-templated;	GO:0005634|nucleus;	GO:0003677|DNA binding;GO:0046872|metal ion binding;	K09228	KRAB; KRAB domain-containing zinc finger protein
ENSG00000132975	3.90294	1.96456	0.0288261	up	yes	GPR12	protein_coding	chr13:26755200-26760785:-	gi|4885295|ref|NP_005279.1|	G-protein coupled receptor 12 [Homo sapiens]	gi|226437573|ref|NM_005288.3|	Homo sapiens G protein-coupled receptor 12 (GPR12), mRNA	P47775	577	0	G-protein coupled receptor 12	.	.	.	.	pfam00001	7tm_1	7 transmembrane receptor (rhodopsin family). This family contains, amongst other G-protein-coupled receptors (GCPRs), members of the opsin family, which have been considered to be typical members of the rhodopsin superfamily. They share several motifs, mainly the seven transmembrane helices, GCPRs of the rhodopsin superfamily. All opsins bind a chromophore, such as 11-cis-retinal. The function of…	GO:0006874|cellular calcium ion homeostasis;GO:0007186|G-protein coupled receptor signaling pathway;	GO:0005887|integral component of plasma membrane;	GO:0004930|G-protein coupled receptor activity;GO:0031210|phosphatidylcholine binding;	K04315	GPR12; G protein-coupled receptor 12
ENSG00000133107	1.89358	0.921117	0.0484493	up	yes	TRPC4	protein_coding	chr13:37636636-37870425:-	gi|209863024|ref|NP_003297.1|	short transient receptor potential channel 4 isoform epsilon [Homo sapiens]	gi|34367471|emb|BX648312.1|	Homo sapiens mRNA; cDNA DKFZp686M09131 (from clone DKFZp686M09131)	P79100	196	3e-50	Short transient receptor potential channel 4	.	.	.	.	pfam00520	Ion_trans	Ion transport protein. This family contains Sodium, Potassium, Calcium ion channels. This family is 6 transmembrane helices in which the last two helices flank a loop which determines ion selectivity. In some sub-families (e.g. Na channels) the domain is repeated four times, whereas in others (e.g. K channels) the protein forms as a tetramer in the membrane. A bacterial structure of the protein i…	GO:0006828|manganese ion transport;GO:0051480|cytosolic calcium ion homeostasis;	GO:0005887|integral component of plasma membrane;	GO:0015279|store-operated calcium channel activity;	K04967	TRPC4; transient receptor potential cation channel subfamily C member 4
ENSG00000133477	0.428617	-1.22224	0.0355114	down	yes	FAM83F	protein_coding	chr22:39994949-40043529:+	gi|156564372|ref|NP_612444.2|	protein FAM83F [Homo sapiens]	gi|3550060|emb|Z83847.1|	Human DNA sequence from clone RP3-496C20 on chromosome 22, complete sequence	Q8NEG4	875	0	Protein FAM83F	.	.	.	.	pfam07894	DUF1669	Protein of unknown function (DUF1669). This family is composed of sequences derived from hypothetical eukaryotic proteins of unknown function. Some members of this family are annotated as being potential phospholipases but no literature was found to support this.	.	.	.	.	.
ENSG00000134250	62.9885	5.97702	0	up	yes	NOTCH2	protein_coding	chr1:119911553-120069626:-	gi|795120218|ref|XP_011788426.1|	PREDICTED: neurogenic locus notch homolog protein 2 [Colobus angolensis palliatus]	gi|317008612|ref|NM_024408.3|	Homo sapiens notch 2 (NOTCH2), transcript variant 1, mRNA	Q04721	271	5e-82	Neurogenic locus notch homolog protein 2	all2748	86.7	3e-16	COG0666	pfam06816	NOD	NOTCH protein. NOTCH signalling plays a fundamental role during a great number of developmental processes in multicellular animals. NOD and NODP represent a region present in many NOTCH proteins and NOTCH homologs in multiple species such as NOTCH2 and NOTCH3, LIN12, SC1 and TAN1. Role of NOD domain remains to be elucidated.	GO:0030154|cell differentiation;GO:0007275|multicellular organismal development;GO:0007219|Notch signaling pathway;	GO:0005737|cytoplasm;GO:0005576|extracellular region;	GO:0005509|calcium ion binding;	K02599	NOTCH; Notch
ENSG00000134765	2.6613	1.41213	0.0407548	up	yes	DSC1	protein_coding	chr18:31129236-31162856:-	gi|13435361|ref|NP_077739.1|	desmocollin-1 isoform Dsc1a preproprotein [Homo sapiens]	gi|205277360|ref|NM_004948.3|	Homo sapiens desmocollin 1 (DSC1), transcript variant Dsc1b, mRNA	Q08554	1791	0	Desmocollin-1	.	.	.	.	pfam00028	Cadherin	Cadherin domain.	GO:0007156|homophilic cell adhesion via plasma membrane adhesion molecules;	GO:0030057|desmosome;GO:0070062|extracellular exosome;GO:0005921|gap junction;GO:0016021|integral component of membrane;GO:0016020|membrane;GO:0005886|plasma membrane;	GO:0005509|calcium ion binding;	K07600	DSC1; desmocollin 1
ENSG00000135960	3.63902	1.86355	0.0169582	up	yes	EDAR	protein_coding	chr2:108894471-108989372:-	gi|767916379|ref|XP_011508804.1|	PREDICTED: tumor necrosis factor receptor superfamily member EDAR isoform X1 [Homo sapiens]	gi|51476429|emb|CR749352.1|	Homo sapiens mRNA; cDNA DKFZp686M13211 (from clone DKFZp686M13211)	Q9UNE0	854	0	Tumor necrosis factor receptor superfamily member EDAR	.	.	.	.	pfam00531	Death	Death domain.	GO:0006915|apoptotic process;GO:0030154|cell differentiation;GO:0008544|epidermis development;GO:0001942|hair follicle development;GO:0042475|odontogenesis of dentin-containing tooth;GO:0043473|pigmentation;GO:0010628|positive regulation of gene expression;GO:0043123|positive regulation of I-kappaB kinase/NF-kappaB signaling;GO:0046330|positive regulation of JNK cascade;GO:0042346|positive regula…	GO:0045177|apical part of cell;GO:0016021|integral component of membrane;GO:0005886|plasma membrane;	GO:0004872|receptor activity;GO:0004888|transmembrane signaling receptor activity;	K05162	EDAR; tumor necrosis factor receptor superfamily member EDAR
ENSG00000137766	0.149201	-2.74467	0.0387386	down	yes	UNC13C	protein_coding	chr15:54012904-54633414:+	gi|122937514|ref|NP_001074003.1|	protein unc-13 homolog C [Homo sapiens]	gi|122937513|ref|NM_001080534.1|	Homo sapiens unc-13 homolog C (C. elegans) (UNC13C), mRNA	Q8NB66	376	1e-116	Protein unc-13 homolog C	.	.	.	.	pfam10540	Membr_traf_MHD	Munc13 (mammalian uncoordinated) homology domain. Munc13 proteins constitute a family of three highly homologous molecules (Munc13-1, Munc13-2 and Munc13-3) with homology to Caenorhabditis elegans unc-13p. Munc13 proteins contain a phorbol ester-binding C1 domain and two C2 domains, which are Ca2+/phospholipid binding domains. Sequence analyses have uncovered two regions called Munc13 homology do…	GO:0007268|synaptic transmission;GO:0006887|exocytosis;GO:0035556|intracellular signal transduction;	GO:0030054|cell junction;GO:0005737|cytoplasm;GO:0005886|plasma membrane;GO:0048786|presynaptic active zone;GO:0042734|presynaptic membrane;	GO:0019992|diacylglycerol binding;GO:0046872|metal ion binding;	K15293	UNC13, MUNC13; protein unc-13
ENSG00000138109	0.547052	-0.87025	0.00667865	down	yes	CYP2C9	protein_coding	chr10:94938658-94989390:+	gi|13699818|ref|NP_000762.2|	cytochrome P450 2C9 precursor [Homo sapiens]	gi|189242609|ref|NM_000771.3|	Homo sapiens cytochrome P450, family 2, subfamily C, polypeptide 9 (CYP2C9), mRNA	P11712	945	0	Cytochrome P450 2C9	BH0579	97.8	9e-21	COG2124	pfam00067	p450	Cytochrome P450. Cytochrome P450s are haem-thiolate proteins involved in the oxidative degradation of various compounds. They are particularly well known for their role in the degradation of environmental toxins and mutagens. They can be divided into 4 classes, according to the method by which electrons from NAD(P)H are delivered to the catalytic site. Sequence conservation is relatively low with…	GO:0043603|cellular amide metabolic process;GO:0042737|drug catabolic process;GO:0017144|drug metabolic process;GO:0019373|epoxygenase P450 pathway;GO:0042738|exogenous drug catabolic process;GO:0032787|monocarboxylic acid metabolic process;GO:0016098|monoterpenoid metabolic process;GO:0097267|omega-hydroxylase P450 pathway;GO:0055114|oxidation-reduction process;GO:0070989|oxidative demethylation…	GO:0005789|endoplasmic reticulum membrane;GO:0043231|intracellular membrane-bounded organelle;GO:0031090|organelle membrane;	GO:0052741|(R)-limonene 6-monooxygenase activity;GO:0018675|(S)-limonene 6-monooxygenase activity;GO:0018676|(S)-limonene 7-monooxygenase activity;GO:0008392|arachidonic acid epoxygenase activity;GO:0034875|caffeine oxidase activity;GO:0001567|cholesterol 25-hydroxylase activity;GO:0008144|drug binding;GO:0020037|heme binding;GO:0005506|iron ion binding;GO:0004497|monooxygenase activity;GO:001649…	K17719	CYP2C9; cytochrome P450, family 2, subfamily C, polypeptide 9 [EC:1.14.13.48 1.14.13.49 1.14.13.80 1.14.13.-]
ENSG00000138400	0.619128	-0.69169	0.00867174	down	yes	MDH1B	protein_coding	chr2:206737763-206765547:-	gi|89886456|ref|NP_001034934.1|	putative malate dehydrogenase 1B isoform a [Homo sapiens]	gi|544709854|ref|NM_001039845.2|	Homo sapiens malate dehydrogenase 1B, NAD (soluble) (MDH1B), transcript variant 1, mRNA	Q5I0G3	254	1e-78	Putative malate dehydrogenase 1B	Rv1240	107	3e-24	COG0039	pfam02866	Ldh_1_C	lactate/malate dehydrogenase, alpha/beta C-terminal domain. L-lactate dehydrogenases are metabolic enzymes which catalyse the conversion of L-lactate to pyruvate, the last step in anaerobic glycolysis. L-2-hydroxyisocaproate dehydrogenases are also members of the family. Malate dehydrogenases catalyse the interconversion of malate to oxaloacetate. The enzyme participates in the citric acid cycle.…	GO:0005975|carbohydrate metabolic process;GO:0006108|malate metabolic process;GO:0006734|NADH metabolic process;GO:0006107|oxaloacetate metabolic process;GO:0006099|tricarboxylic acid cycle;	GO:0005737|cytoplasm;	GO:0030060|L-malate dehydrogenase activity;	.	.
ENSG00000139194	0.492413	-1.02206	1.98023e-06	down	yes	RBP5	protein_coding	chr12:7123684-7128942:-	gi|13899352|ref|NP_113679.1|	retinol-binding protein 5 [Homo sapiens]	gi|426371476|ref|XM_004052625.1|	PREDICTED: Gorilla gorilla gorilla retinol binding protein 5, cellular (RBP5), mRNA	P82980	284	1e-94	Retinol-binding protein 5	.	.	.	.	pfam00061	Lipocalin	Lipocalin / cytosolic fatty-acid binding protein family. Lipocalins are transporters for small hydrophobic molecules, such as lipids, steroid hormones, bilins, and retinoids. The family also encompasses the enzyme prostaglandin D synthase (EC:5.3.99.2). Alignment subsumes both the lipocalin and fatty acid binding protein signatures from PROSITE. This is supported on structural and functional grou…	.	GO:0005737|cytoplasm;GO:0070062|extracellular exosome;	GO:0016918|retinal binding;GO:0005501|retinoid binding;GO:0019841|retinol binding;GO:0005215|transporter activity;	.	.
ENSG00000140478	6.05278	2.5976	0.0411949	up	yes	GOLGA6D	protein_coding	chr15:75258558-75295530:+	gi|223634475|ref|NP_001138696.1|	putative golgin subfamily A member 6D [Homo sapiens]	gi|223634474|ref|NM_001145224.1|	Homo sapiens golgin A6 family, member D (GOLGA6D), mRNA	P0CG33	1109	0	Golgin subfamily A member 6D	.	.	.	.	pfam15070	GOLGA2L5	Putative golgin subfamily A member 2-like protein 5. The function of the GOLGA2L5 protein family remains unknown. This family of proteins is thought to be found in the Golgi apparatus of eukaryotes. Proteins in this family are typically between and 840 amino acids in length.	.	GO:0005794|Golgi apparatus;	.	.	.
ENSG00000140527	0.645865	-0.630696	0.00178656	down	yes	WDR93	protein_coding	chr15:89690797-89743638:+	gi|40556361|ref|NP_064597.1|	WD repeat-containing protein 93 isoform 1 [Homo sapiens]	gi|40556360|ref|NM_020212.1|	Homo sapiens WD repeat domain 93 (WDR93), transcript variant 1, mRNA	Q6P2C0	1412	0	WD repeat-containing protein 93	.	.	.	.	pfam13900	GVQW	Putative binding domain. This short domain is often found nested inside other longer domains. The function is not known, but the domain carries a highly conserved GVQW motif. The members are rich in proline and cysteine. This may be a binding domain.	GO:0022900|electron transport chain;	GO:0005747|mitochondrial respiratory chain complex I;	GO:0008137|NADH dehydrogenase (ubiquinone) activity;	.	.
ENSG00000143110	0.61431	-0.702961	1.01996e-06	down	yes	C1orf162	protein_coding	chr1:111473792-111478512:+	gi|694888157|ref|XP_009427443.1|	PREDICTED: transmembrane protein C1orf162 homolog isoform X1 [Pan troglodytes]	gi|34528636|dbj|AK123160.1|	Homo sapiens cDNA FLJ41165 fis, clone BRACE2040640	Q8NEQ5	264	3e-86	Transmembrane protein C1orf162	.	.	.	.	pfam03125	Sre	C. elegans Sre G protein-coupled chemoreceptor. Caenorhabditis elegans Sre proteins are candidate chemosensory receptors. There are four main recognized groups of such receptors: Odr-10, Sra, Sro, and Srg. Sre (this family), Sra pfam02117 and Srb pfam02175 comprise the Sra group. All of the above receptors are thought to be G protein-coupled seven transmembrane domain proteins. The existence of s…	.	GO:0016021|integral component of membrane;	.	.	.
ENSG00000146006	0.512425	-0.964587	1.77361e-07	down	yes	LRRTM2	protein_coding	chr5:138868923-138875368:-	gi|40788250|dbj|BAA24846.2|	KIAA0416 [Homo sapiens]	gi|426350144|ref|XM_004042594.1|	PREDICTED: Gorilla gorilla gorilla leucine rich repeat transmembrane neuronal 2 (LRRTM2), mRNA	O43300	741	0	Leucine-rich repeat transmembrane neuronal protein 2	SPy1798	103	6e-21	COG4886	pfam13855	LRR_8	Leucine rich repeat.	GO:0060291|long-term synaptic potentiation;GO:0002091|negative regulation of receptor internalization;GO:0051965|positive regulation of synapse assembly;GO:0050808|synapse organization;	GO:0030054|cell junction;GO:0060076|excitatory synapse;GO:0016021|integral component of membrane;GO:0045211|postsynaptic membrane;	.	K16665	LRRTM1_2; leucine-rich repeat transmembrane neuronal protein 1/2
ENSG00000146013	0.502143	-0.993829	0.000106102	down	yes	GFRA3	protein_coding	chr5:138252379-138274671:-	gi|22035694|ref|NP_001487.2|	GDNF family receptor alpha-3 preproprotein [Homo sapiens]	gi|45593145|ref|NM_001496.3|	Homo sapiens GDNF family receptor alpha 3 (GFRA3), mRNA	O60609	719	0	GDNF family receptor alpha-3	.	.	.	.	pfam02351	GDNF	GDNF/GAS1 domain. This cysteine rich domain is found in multiple copies in GNDF and GAS1 proteins. GDNF and neurturin (NTN) receptors are potent survival factors for sympathetic, sensory and central nervous system neurons. GDNF and neurturin promote neuronal survival by signaling through similar multicomponent receptors that consist of a common receptor tyrosine kinase and a member of a GPI-linke…	GO:0000165|MAPK cascade;GO:0007399|nervous system development;GO:0001764|neuron migration;GO:0007422|peripheral nervous system development;GO:0007165|signal transduction;GO:0048485|sympathetic nervous system development;	GO:0031225|anchored component of membrane;GO:0005737|cytoplasm;GO:0009897|external side of plasma membrane;GO:0019898|extrinsic component of membrane;GO:0043231|intracellular membrane-bounded organelle;GO:0005886|plasma membrane;	GO:0008046|axon guidance receptor activity;GO:0005088|Ras guanyl-nucleotide exchange factor activity;GO:0005102|receptor binding;	.	.
ENSG00000148677	1.70767	0.772027	1.42844e-09	up	yes	ANKRD1	protein_coding	chr10:90912096-90921276:-	gi|585640353|ref|XP_006880391.1|	PREDICTED: ankyrin repeat domain-containing protein 1 [Elephantulus edwardii]	gi|38327521|ref|NM_014391.2|	Homo sapiens ankyrin repeat domain 1 (cardiac muscle) (ANKRD1), mRNA	Q15327	617	0	Ankyrin repeat domain-containing protein 1	all2748	82.8	6e-16	COG0666	pfam12796	Ank_2	Ankyrin repeats (3 copies).	GO:0055008|cardiac muscle tissue morphogenesis;GO:0035690|cellular response to drug;GO:0071456|cellular response to hypoxia;GO:0071347|cellular response to interleukin-1;GO:0071222|cellular response to lipopolysaccharide;GO:0071260|cellular response to mechanical stimulus;GO:0071407|cellular response to organic cyclic compound;GO:0071560|cellular response to transforming growth factor beta stimul…	GO:0005737|cytoplasm;GO:0005829|cytosol;GO:0031674|I band;GO:0005730|nucleolus;GO:0005654|nucleoplasm;GO:0005634|nucleus;GO:0030017|sarcomere;GO:0005667|transcription factor complex;	GO:0003677|DNA binding;GO:0042826|histone deacetylase binding;GO:0002039|p53 binding;GO:0070412|R-SMAD binding;GO:0001105|RNA polymerase II transcription coactivator activity;GO:0001085|RNA polymerase II transcription factor binding;GO:0031432|titin binding;GO:0003714|transcription corepressor activity;	.	.
ENSG00000149633	3.58411	1.84161	0.0387699	up	yes	KIAA1755	protein_coding	chr20:38210488-38260772:-	gi|426391684|ref|XP_004062198.1|	PREDICTED: uncharacterized protein KIAA1755 homolog [Gorilla gorilla gorilla]	gi|71274185|ref|NM_001029864.1|	Homo sapiens KIAA1755 (KIAA1755), mRNA	Q5JYT7	2278	0	Uncharacterized protein KIAA1755	.	.	.	.	pfam13716	CRAL_TRIO_2	Divergent CRAL/TRIO domain. This family includes divergent members of the CRAL-TRIO domain family. This family includes ECM25 that contains a divergent CRAL-TRIO domain identified by Gallego and colleagues.	.	.	.	.	.
ENSG00000149646	0.567247	-0.817951	0.0194909	down	yes	CNBD2	protein_coding	chr20:35954564-36030700:+	gi|530417867|ref|XP_005260352.1|	PREDICTED: cyclic nucleotide-binding domain-containing protein 2 isoform X4 [Homo sapiens]	gi|34785368|gb|BC057288.1|	Homo sapiens chromosome 20 open reading frame 152, mRNA (cDNA clone IMAGE:4824230)	Q96M20	287	3e-88	Cyclic nucleotide-binding domain-containing protein 2	.	.	.	.	pfam13900	GVQW	Putative binding domain. This short domain is often found nested inside other longer domains. The function is not known, but the domain carries a highly conserved GVQW motif. The members are rich in proline and cysteine. This may be a binding domain.	GO:0007283|spermatogenesis;	GO:0005829|cytosol;	GO:0030552|cAMP binding;	.	.
ENSG00000150337	0.485363	-1.04286	0.00452023	down	yes	FCGR1A	protein_coding	chr1:149782671-149792518:+	gi|10835133|ref|NP_000557.1|	high affinity immunoglobulin gamma Fc receptor I precursor [Homo sapiens]	gi|167621452|ref|NM_000566.3|	Homo sapiens Fc fragment of IgG, high affinity Ia, receptor (CD64) (FCGR1A), mRNA	P12314	464	5e-163	High affinity immunoglobulin gamma Fc receptor I	.	.	.	.	pfam13895	Ig_2	Immunoglobulin domain. This domain contains immunoglobulin-like domains.	GO:0002479|antigen processing and presentation of exogenous peptide antigen via MHC class I, TAP-dependent;GO:0038096|Fc-gamma receptor signaling pathway involved in phagocytosis;GO:0006955|immune response;GO:0060333|interferon-gamma-mediated signaling pathway;GO:0006911|phagocytosis, engulfment;GO:0006898|receptor-mediated endocytosis;GO:0050776|regulation of immune response;GO:0007165|signal tr…	GO:0030669|clathrin-coated endocytic vesicle membrane;GO:0031901|early endosome membrane;GO:0016021|integral component of membrane;GO:0005886|plasma membrane;	GO:0005057|receptor signaling protein activity;	K06498	FCGR1A, CD64; high affinity immunoglobulin gamma Fc receptor I
ENSG00000150783	11.9907	3.58385	0.00958388	up	yes	TEX12	protein_coding	chr11:112167372-112172559:+	gi|685589565|ref|XP_009185538.1|	PREDICTED: testis-expressed sequence 12 protein isoform X1 [Papio anubis]	gi|133930777|ref|NM_031275.4|	Homo sapiens testis expressed 12 (TEX12), mRNA	Q9BXU0	216	9e-68	Testis-expressed sequence 12 protein	.	.	.	.	pfam15219	TEX12	Testis-expressed 12.	GO:0000711|meiotic DNA repair synthesis;GO:0007130|synaptonemal complex assembly;	GO:0000801|central element;	.	K19537	TEX12; testis-expressed sequence 12 protein
ENSG00000151360	0.55117	-0.859431	0.00235031	down	yes	ALLC	protein_coding	chr2:3658195-3702671:+	gi|327478594|sp|Q8N6M5.3|ALLC_HUMAN	RecName: Full=Probable allantoicase; AltName: Full=Allantoate amidinohydrolase	gi|23958875|gb|BC035356.1|	Homo sapiens allantoicase, mRNA (cDNA clone IMAGE:5170650), complete cds	Q8N6M5	378	5e-129	Probable allantoicase	SMb21283	250	2e-77	COG4266	pfam03561	Allantoicase	Allantoicase repeat. This family is found in pairs in Allantoicases, forming the majority of the protein. These proteins allow the use of purines as secondary nitrogen sources in nitrogen-limiting conditions through the reaction: allantoate + H(2)0 = (-)-ureidoglycolate + urea.	GO:0000256|allantoin catabolic process;	.	GO:0004037|allantoicase activity;	K01477	alc, ALLC; allantoicase [EC:3.5.3.4]
ENSG00000151967	1.53169	0.61512	0.0169395	up	yes	SCHIP1	protein_coding	chr3:159839861-159897360:+	gi|148683562|gb|EDL15509.1|	schwannomin interacting protein 1, partial [Mus musculus]	gi|34367338|emb|BX648179.1|	Homo sapiens mRNA; cDNA DKFZp686D05168 (from clone DKFZp686D05168)	Q3TI53	101	1e-23	Schwannomin-interacting protein 1	.	.	.	.	pfam10148	SCHIP-1	Schwannomin-interacting protein 1. Members of this family are coiled coil protein involved in linking membrane proteins to the cytoskeleton.	.	GO:0005737|cytoplasm;	.	.	.
ENSG00000152463	0.465386	-1.1035	0.0159933	down	yes	OLAH	protein_coding	chr10:15032227-15073852:+	gi|8922871|ref|NP_060794.1|	S-acyl fatty acid synthase thioesterase, medium chain isoform 1 [Homo sapiens]	gi|217416333|ref|NM_018324.2|	Homo sapiens oleoyl-ACP hydrolase (OLAH), transcript variant 1, mRNA	Q9NV23	305	2e-102	S-acyl fatty acid synthase thioesterase, medium chain	alr2045	86.7	2e-19	COG3208	pfam00975	Thioesterase	Thioesterase domain. Peptide synthetases are involved in the non-ribosomal synthesis of peptide antibiotics. Next to the operons encoding these enzymes, in almost all cases, are genes that encode proteins that have similarity to the type II fatty acid thioesterases of vertebrates. There are also modules within the peptide synthetases that also share this similarity. With respect to antibiotic pro…	GO:0006633|fatty acid biosynthetic process;GO:0008610|lipid biosynthetic process;	.	GO:0016295|myristoyl-[acyl-carrier-protein] hydrolase activity;GO:0004320|oleoyl-[acyl-carrier-protein] hydrolase activity;GO:0016296|palmitoyl-[acyl-carrier-protein] hydrolase activity;	K01071	MCH; medium-chain acyl-[acyl-carrier-protein] hydrolase [EC:3.1.2.21]
ENSG00000152672	0.615088	-0.701136	0.0118095	down	yes	CLEC4F	protein_coding	chr2:70808643-70820600:-	gi|47778940|ref|NP_775806.2|	C-type lectin domain family 4 member F isoform 1 [Homo sapiens]	gi|47778939|ref|NM_173535.2|	Homo sapiens C-type lectin domain family 4, member F (CLEC4F), transcript variant 1, mRNA	Q8N1N0	1177	0	C-type lectin domain family 4 member F	.	.	.	.	pfam00059	Lectin_C	Lectin C-type domain. This family includes both long and short form C-type	GO:0006897|endocytosis;	GO:0016021|integral component of membrane;	GO:0030246|carbohydrate binding;	K10060	CLEC4F, CLECSF13; C-type lectin domain family 4 member F
ENSG00000153237	0.665878	-0.58667	0.0149144	down	yes	CCDC148	protein_coding	chr2:158171081-158456753:-	gi|530369858|ref|XP_005246376.1|	PREDICTED: coiled-coil domain-containing protein 148 isoform X2 [Homo sapiens]	gi|284172494|ref|NM_138803.3|	Homo sapiens coiled-coil domain containing 148 (CCDC148), transcript variant 1, mRNA	Q8NFR7	467	6e-159	Coiled-coil domain-containing protein 148	.	.	.	.	pfam13868	Trichoplein	tumor suppressor, Mitostatin. Trichoplein or mitostatin, was first defined as a meiosis-specific nuclear structural protein. It has since been linked with mitochondrial movement. It is associated with the mitochondrial outer membrane, and over-expression leads to reduction in mitochondrial motility whereas lack of it enhances mitochondrial movement. The activity appears to be mediated through bin…	.	.	.	.	.
ENSG00000153495	0.52002	-0.943362	0.032193	down	yes	TEX29	protein_coding	chr13:111316184-111344249:+	gi|119629556|gb|EAX09151.1|	hypothetical protein MGC35169, isoform CRA_a [Homo sapiens]	gi|20988289|gb|BC029889.1|	Homo sapiens chromosome 13 open reading frame 16, mRNA (cDNA clone MGC:35169 IMAGE:5170095), complete cds	Q8N6K0	241	5e-79	Testis-expressed sequence 29 protein	.	.	.	.	pfam04734	Ceramidase_alk	Neutral/alkaline non-lysosomal ceramidase. This family represents a group of neutral/alkaline ceramidases found in both bacteria and eukaryotes.	.	GO:0016021|integral component of membrane;	.	.	.
ENSG00000154175	1.7181	0.780812	0.0161414	up	yes	ABI3BP	protein_coding	chr3:100749156-100993515:-	gi|530374266|ref|XP_005247340.1|	PREDICTED: target of Nesh-SH3 isoform X4 [Homo sapiens]	gi|544416955|ref|XM_005548280.1|	PREDICTED: Macaca fascicularis ABI family, member 3 (NESH) binding protein (ABI3BP), transcript variant X4, mRNA	Q7Z7G0	206	1e-59	Target of Nesh-SH3	.	.	.	.	pfam13900	GVQW	Putative binding domain. This short domain is often found nested inside other longer domains. The function is not known, but the domain carries a highly conserved GVQW motif. The members are rich in proline and cysteine. This may be a binding domain.	GO:0030198|extracellular matrix organization;GO:0010811|positive regulation of cell-substrate adhesion;	GO:0005615|extracellular space;GO:0005614|interstitial matrix;	GO:0008201|heparin binding;	.	.
ENSG00000155465	0.663002	-0.592914	0.0303479	down	yes	SLC7A7	protein_coding	chr14:22773222-22829820:-	gi|28207931|emb|CAD62619.1|	unnamed protein product [Homo sapiens]	gi|62088761|dbj|AB209591.1|	Homo sapiens mRNA for Full-length cDNA clone CS0DI086YB20 variant protein	Q6B4Z3	78.2	2e-17	Histone demethylase UTY	BS_ykbA	156	3e-40	COG0531	pfam13520	AA_permease_2	Amino acid permease.	GO:0010468|regulation of gene expression;	GO:0005634|nucleus;	GO:0051213|dioxygenase activity;GO:0071558|histone demethylase activity (H3-K27 specific);GO:0046872|metal ion binding;	K11447	UTX, UTY; histone demethylase [EC:1.14.11.-]
ENSG00000155918	0.152989	-2.7085	0.0191254	down	yes	RAET1L	protein_coding	chr6:150018334-150025532:-	gi|126723295|ref|NP_570970.2|	retinoic acid early transcript 1L protein precursor [Homo sapiens]	gi|426354911|ref|XM_004044837.1|	PREDICTED: Gorilla gorilla gorilla UL16 binding protein 2 (ULBP2), mRNA	Q5VY80	438	3e-152	Retinoic acid early transcript 1L protein	.	.	.	.	pfam14586	MHC_I_2	Class I Histocompatibility antigen, NKG2D ligand, domains 1 and 2. Members of this family are known as retinoic-acid-inducible proteins. They are ligands for the activating immunoreceptor NKG2D, which is widely expressed on natural killer cells, T cells, and macrophages.	GO:0019882|antigen processing and presentation;GO:0042267|natural killer cell mediated cytotoxicity;	GO:0031225|anchored component of membrane;GO:0005886|plasma membrane;	GO:0003823|antigen binding;GO:0046703|natural killer cell lectin-like receptor binding;	K07987	RAET1; retinoic acid early transcript 1
ENSG00000156097	0.61449	-0.702538	0.00607426	down	yes	GPR61	protein_coding	chr1:109539872-109548406:+	gi|62087772|dbj|BAD92333.1|	G protein-coupled receptor 61 variant [Homo sapiens]	gi|388490168|ref|NG_032758.1|	Homo sapiens G protein-coupled receptor 61 (GPR61), RefSeqGene on chromosome 1	Q9BZJ8	754	0	Probable G-protein coupled receptor 61	.	.	.	.	pfam00001	7tm_1	7 transmembrane receptor (rhodopsin family). This family contains, amongst other G-protein-coupled receptors (GCPRs), members of the opsin family, which have been considered to be typical members of the rhodopsin superfamily. They share several motifs, mainly the seven transmembrane helices, GCPRs of the rhodopsin superfamily. All opsins bind a chromophore, such as 11-cis-retinal. The function of…	.	GO:0016021|integral component of membrane;GO:0005886|plasma membrane;GO:0043235|receptor complex;	GO:0004930|G-protein coupled receptor activity;	K08414	GPR61; G protein-coupled receptor 61
ENSG00000156920	0.391028	-1.35466	0.0225594	down	yes	ADGRG4	protein_coding	chrX:136300963-136416888:+	gi|59710093|ref|NP_722576.3|	adhesion G-protein coupled receptor G4 [Homo sapiens]	gi|59710092|ref|NM_153834.3|	Homo sapiens adhesion G protein-coupled receptor G4 (ADGRG4), mRNA	Q8IZF6	5305	0	Adhesion G-protein coupled receptor G4	.	.	.	.	pfam00002	7tm_2	7 transmembrane receptor (Secretin family). This family is known as Family B, the secretin-receptor family or family 2 of the G-protein-coupled receptors (GCPRs).They have been described in many animal species, but not in plants, fungi or prokaryotes. Three distinct sub-families are recognized. Subfamily B1 contains classical hormone receptors, such as receptors for secretin and glucagon, that ar…	GO:0007166|cell surface receptor signaling pathway;GO:0007186|G-protein coupled receptor signaling pathway;	GO:0016021|integral component of membrane;	GO:0004930|G-protein coupled receptor activity;	K08455	GPR112; G protein-coupled receptor 112
ENSG00000156959	0.222927	-2.16536	0.0321871	down	yes	LHFPL4	protein_coding	chr3:9498361-9553802:-	gi|38348398|ref|NP_940962.1|	lipoma HMGIC fusion partner-like 4 protein [Homo sapiens]	gi|108773811|ref|NM_198560.2|	Homo sapiens lipoma HMGIC fusion partner-like 4 (LHFPL4), mRNA	Q7TSY2	78.2	2e-17	Lipoma HMGIC fusion partner-like protein 4	.	.	.	.	pfam10242	L_HGMIC_fpl	Lipoma HMGIC fusion partner-like protein. This is a group of proteins expressed from a series of genes referred to as Lipoma HGMIC fusion partner-like. The proteins carry four highly conserved transmembrane domains in this entry. In certain instances, eg in LHFPL5, mutations cause deafness in humans and hypospadias, and LHFPL1 is transcribed in six liver tumor cell lines.	.	GO:0016021|integral component of membrane;	.	.	.
ENSG00000158406	0.615851	-0.699348	1.29842e-15	down	yes	HIST1H4H	protein_coding	chr6:26277609-26285638:-	gi|795293935|ref|XP_011821818.1|	PREDICTED: histone H4-like [Mandrillus leucophaeus]	gi|15012054|gb|BC010926.1|	Homo sapiens histone cluster 1, H4h, mRNA (cDNA clone IMAGE:4273904)	Q28DR4	164	3e-46	Histone H4	.	.	.	.	pfam00125	Histone	Core histone H2A/H2B/H3/H4.	GO:0006352|DNA-templated transcription, initiation;GO:0006334|nucleosome assembly;	GO:0000786|nucleosome;GO:0005634|nucleus;	GO:0003677|DNA binding;	K11254	H4; histone H4
ENSG00000159708	1.89494	0.922152	0.0237635	up	yes	LRRC36	protein_coding	chr16:67326798-67385203:+	gi|239735605|ref|NP_060766.5|	leucine-rich repeat-containing protein 36 isoform 1 [Homo sapiens]	gi|239735604|ref|NM_018296.5|	Homo sapiens leucine rich repeat containing 36 (LRRC36), transcript variant 1, mRNA	Q1X8D7	213	2e-59	Leucine-rich repeat-containing protein 36	.	.	.	.	pfam13900	GVQW	Putative binding domain. This short domain is often found nested inside other longer domains. The function is not known, but the domain carries a highly conserved GVQW motif. The members are rich in proline and cysteine. This may be a binding domain.	.	.	.	K16594	LRRC36; leucine-rich repeat-containing protein 36
ENSG00000160973	0.525156	-0.929181	0.0084352	down	yes	FOXH1	protein_coding	chr8:144473412-144476335:-	gi|397497323|ref|XP_003819462.1|	PREDICTED: forkhead box protein H1 [Pan paniscus]	gi|208973255|ref|NM_003923.2|	Homo sapiens forkhead box H1 (FOXH1), mRNA	O75593	650	0	Forkhead box protein H1	ECU11g1330	76.3	2e-14	COG5025	pfam00250	Fork_head	Fork head domain.	GO:0035909|aorta morphogenesis;GO:0048318|axial mesoderm development;GO:0003215|cardiac right ventricle morphogenesis;GO:0035054|embryonic heart tube anterior/posterior pattern specification;GO:0001947|heart looping;GO:2000824|negative regulation of androgen receptor activity;GO:0060766|negative regulation of androgen receptor signaling pathway;GO:0033147|negative regulation of intracellular estr…	GO:0032444|activin responsive factor complex;GO:0000790|nuclear chromatin;GO:0005654|nucleoplasm;GO:0005634|nucleus;GO:0005667|transcription factor complex;	GO:0050681|androgen receptor binding;GO:0043425|bHLH transcription factor binding;GO:0070410|co-SMAD binding;GO:0035326|enhancer binding;GO:0019904|protein domain specific binding;GO:0070412|R-SMAD binding;GO:0001104|RNA polymerase II transcription cofactor activity;GO:0000981|RNA polymerase II transcription factor activity, sequence-specific DNA binding;GO:0043565|sequence-specific DNA binding;G…	K09400	FOXH; forkhead box protein H
ENSG00000162148	0.52947	-0.91738	0.000657146	down	yes	PPP1R32	protein_coding	chr11:61481120-61490931:+	gi|675789986|ref|XP_008952105.1|	PREDICTED: protein phosphatase 1 regulatory subunit 32 isoform X1 [Pan paniscus]	gi|283046777|ref|NM_145017.2|	Homo sapiens protein phosphatase 1, regulatory subunit 32 (PPP1R32), transcript variant 1, mRNA	Q7Z5V6	848	0	Protein phosphatase 1 regulatory subunit 32	.	.	.	.	pfam15240	Pro-rich	Proline-rich. This family includes several eukaryotic proline-rich proteins.	.	.	GO:0019902|phosphatase binding;	K17571	PPP1R32; protein phosphatase 1 regulatory subunit 32
ENSG00000162782	0.39958	-1.32344	0.0387632	down	yes	TDRD5	protein_coding	chr1:179591613-179691272:+	gi|312283633|ref|NP_001186014.1|	tudor domain-containing protein 5 isoform 1 [Homo sapiens]	gi|312283632|ref|NM_001199085.1|	Homo sapiens tudor domain containing 5 (TDRD5), transcript variant 1, mRNA	D2H3M0	1634	0	Tudor domain-containing protein 5	.	.	.	.	pfam00567	TUDOR	Tudor domain.	GO:0043046|DNA methylation involved in gamete generation;GO:0030719|P granule organization;GO:0007286|spermatid development;	GO:0033391|chromatoid body;GO:0071546|pi-body;	.	K18407	TDRD5; tudor domain-containing protein 5
ENSG00000162896	0.331215	-1.59416	0.0130258	down	yes	PIGR	protein_coding	chr1:206928518-206946466:-	gi|238236|gb|AAB20203.1|	transmembrane secretory component [Homo sapiens]	gi|239915993|ref|NM_002644.3|	Homo sapiens polymeric immunoglobulin receptor (PIGR), mRNA	P01833	87.4	1e-19	Polymeric immunoglobulin receptor	.	.	.	.	pfam13900	GVQW	Putative binding domain. This short domain is often found nested inside other longer domains. The function is not known, but the domain carries a highly conserved GVQW motif. The members are rich in proline and cysteine. This may be a binding domain.	GO:0001580|detection of chemical stimulus involved in sensory perception of bitter taste;GO:0007173|epidermal growth factor receptor signaling pathway;GO:0038093|Fc receptor signaling pathway;GO:0002415|immunoglobulin transcytosis in epithelial cells mediated by polymeric immunoglobulin receptor;GO:0043113|receptor clustering;GO:0001895|retina homeostasis;	GO:0070062|extracellular exosome;GO:0005615|extracellular space;GO:0005887|integral component of plasma membrane;GO:0005886|plasma membrane;GO:0043235|receptor complex;	GO:0001792|polymeric immunoglobulin receptor activity;	K13073	PIGR; polymeric immunoglobulin receptor
ENSG00000162989	1.56319	0.644494	0.0344717	up	yes	KCNJ3	protein_coding	chr2:154698299-154858352:+	gi|74004380|ref|XP_545477.2|	PREDICTED: G protein-activated inward rectifier potassium channel 1 isoform X2 [Canis lupus familiaris]	gi|386781835|ref|NM_002239.3|	Homo sapiens potassium channel, inwardly rectifying subfamily J, member 3 (KCNJ3), transcript variant 1, mRNA	P48549	987	0	G protein-activated inward rectifier potassium channel 1	.	.	.	.	pfam01007	IRK	Inward rectifier potassium channel.	GO:0010107|potassium ion import;GO:0006813|potassium ion transport;GO:0051602|response to electrical stimulus;	GO:0009897|external side of plasma membrane;GO:0005886|plasma membrane;GO:0030315|T-tubule;GO:0008076|voltage-gated potassium channel complex;	GO:0015467|G-protein activated inward rectifier potassium channel activity;	K04997	KCNJ3; potassium inwardly-rectifying channel subfamily J member 3
ENSG00000163380	2.94766	1.55957	0.0197477	up	yes	LMOD3	protein_coding	chr3:69106872-69123032:-	gi|54607116|ref|NP_938012.2|	leiomodin-3 [Homo sapiens]	gi|21732573|emb|AL832033.1|	Homo sapiens mRNA; cDNA DKFZp451P024 (from clone DKFZp451P024)	Q0VAK6	907	0	Leiomodin-3	.	.	.	.	pfam13900	GVQW	Putative binding domain. This short domain is often found nested inside other longer domains. The function is not known, but the domain carries a highly conserved GVQW motif. The members are rich in proline and cysteine. This may be a binding domain.	GO:0007015|actin filament organization;GO:0006936|muscle contraction;GO:0030239|myofibril assembly;GO:0051694|pointed-end actin filament capping;	GO:0031430|M band;GO:0005865|striated muscle thin filament;	GO:0005523|tropomyosin binding;	.	.
ENSG00000163806	0.589261	-0.76302	0.0209498	down	yes	SPDYA	protein_coding	chr2:28782517-28850611:+	gi|60498969|ref|NP_877433.2|	speedy protein A isoform 1 [Homo sapiens]	gi|217416325|ref|NM_182756.3|	Homo sapiens speedy/RINGO cell cycle regulator family member A (SPDYA), transcript variant 1, mRNA	Q5MJ70	273	6e-89	Speedy protein A	.	.	.	.	pfam11357	Spy1	Cell cycle regulatory protein. Speedy (Spy1) is a cell cycle regulatory protein which activates CDK2, the major kinase that allows progression through G1/S phase and further replication events. Spy1 expression overcomes a p27-induced cell cycle arrest to allow for DNA synthesis, so cell cycle progression occurs due to an interaction between Spy1 and p27. Spy1 is also known as Ringo protein A.	GO:0006974|cellular response to DNA damage stimulus;GO:0000082|G1/S transition of mitotic cell cycle;GO:0007140|male meiosis;GO:0007275|multicellular organismal development;GO:0008284|positive regulation of cell proliferation;GO:0045737|positive regulation of cyclin-dependent protein serine/threonine kinase activity;	GO:0005634|nucleus;	GO:0019901|protein kinase binding;	K08694	SPDY, RINGO; speedy
ENSG00000163810	2.31808	1.21293	0.0218009	up	yes	TGM4	protein_coding	chr3:44874608-44914990:+	gi|156627577|ref|NP_003232.2|	protein-glutamine gamma-glutamyltransferase 4 [Homo sapiens]	gi|156627576|ref|NM_003241.3|	Homo sapiens transglutaminase 4 (TGM4), mRNA	P49221	260	2e-80	Protein-glutamine gamma-glutamyltransferase 4	.	.	.	.	pfam00868	Transglut_N	Transglutaminase family.	GO:0018149|peptide cross-linking;	GO:0005737|cytoplasm;GO:0070062|extracellular exosome;GO:0031012|extracellular matrix;GO:0005794|Golgi apparatus;	GO:0046872|metal ion binding;GO:0003810|protein-glutamine gamma-glutamyltransferase activity;	K05621	TGM4; transglutaminase 4 [EC:2.3.2.13]
ENSG00000164406	0.663734	-0.591322	0.00544748	down	yes	LEAP2	protein_coding	chr5:132872322-132875046:+	gi|743750229|ref|XP_010969909.1|	PREDICTED: liver-expressed antimicrobial peptide 2 [Camelus bactrianus]	gi|426349938|ref|XM_004042494.1|	PREDICTED: Gorilla gorilla gorilla liver expressed antimicrobial peptide 2 (LEAP2), mRNA	Q969E1	155	3e-43	Liver-expressed antimicrobial peptide 2	.	.	.	.	pfam07359	LEAP-2	Liver-expressed antimicrobial peptide 2 precursor (LEAP-2). This family consists of several mammalian liver-expressed antimicrobial peptide 2 (LEAP-2) sequences. LEAP-2 is a cysteine-rich, and cationic protein. LEAP-2 contains a core structure with two disulfide bonds formed by cysteine residues in relative 1-3 and 2-4 positions. LEAP-2 is synthesized as a 77-residue precursor, which is predomina…	GO:0042742|defense response to bacterium;	GO:0005576|extracellular region;	.	.	.
ENSG00000165140	0.238269	-2.06934	0.00190397	down	yes	FBP1	protein_coding	chr9:94603133-94640249:-	gi|16579888|ref|NP_000498.2|	fructose-1,6-bisphosphatase 1 [Homo sapiens]	gi|189083691|ref|NM_001127628.1|	Homo sapiens fructose-1,6-bisphosphatase 1 (FBP1), transcript variant 2, mRNA	P09467	337	1e-114	Fructose-1,6-bisphosphatase 1	YLR377c	295	1e-94	COG0158	pfam00316	FBPase	Fructose-1-6-bisphosphatase.	GO:0035690|cellular response to drug;GO:0071286|cellular response to magnesium ion;GO:0016311|dephosphorylation;GO:0030388|fructose 1,6-bisphosphate metabolic process;GO:0006002|fructose 6-phosphate metabolic process;GO:0006001|fructose catabolic process;GO:0006000|fructose metabolic process;GO:0006094|gluconeogenesis;GO:0030308|negative regulation of cell growth;GO:0045820|negative regulation of…	GO:0005737|cytoplasm;GO:0005829|cytosol;GO:0070062|extracellular exosome;	GO:0016208|AMP binding;GO:0042132|fructose 1,6-bisphosphate 1-phosphatase activity;GO:0042802|identical protein binding;GO:0046872|metal ion binding;GO:0048029|monosaccharide binding;	K03841	FBP, fbp; fructose-1,6-bisphosphatase I [EC:3.1.3.11]
ENSG00000165568	0.210639	-2.24715	0.0226392	down	yes	AKR1E2	protein_coding	chr10:4786629-4848062:+	gi|93277124|ref|NP_001035267.1|	1,5-anhydro-D-fructose reductase isoform 1 [Homo sapiens]	gi|402478653|ref|NR_073125.1|	Homo sapiens aldo-keto reductase family 1, member E2 (AKR1E2), transcript variant 4, non-coding RNA	P82125	64.3	3e-28	1,5-anhydro-D-fructose reductase	SPBC8E4.04	130	8e-35	COG0656	pfam00248	Aldo_ket_red	Aldo/keto reductase family. This family includes a number of K+ ion channel beta chain regulatory domains - these are reported to have oxidoreductase activity.	.	GO:0005737|cytoplasm;GO:0070062|extracellular exosome;	GO:0050571|1,5-anhydro-D-fructose reductase activity;	K13981	AKR1E2, AKR1CL2; 1,5-anhydro-D-fructose reductase [EC:1.1.1.263]
ENSG00000165695	0.646594	-0.629068	0.00173611	down	yes	AK8	protein_coding	chr9:132725578-132878777:-	gi|22749187|ref|NP_689785.1|	adenylate kinase 8 [Homo sapiens]	gi|23336941|gb|BC037402.1|	Homo sapiens chromosome 9 open reading frame 98, mRNA (cDNA clone IMAGE:5163904), with apparent retained intron	Q96MA6	63.5	3e-09	Adenylate kinase 8	FN1298	110	4e-26	COG0563	pfam00406	ADK	Adenylate kinase.	GO:0015949|nucleobase-containing small molecule interconversion;GO:0006165|nucleoside diphosphate phosphorylation;GO:0009142|nucleoside triphosphate biosynthetic process;GO:0021591|ventricular system development;	GO:0005930|axoneme;GO:0005829|cytosol;GO:0036126|sperm flagellum;	GO:0004017|adenylate kinase activity;GO:0005524|ATP binding;GO:0004127|cytidylate kinase activity;GO:0004550|nucleoside diphosphate kinase activity;GO:0019206|nucleoside kinase activity;	K00939	adk, AK; adenylate kinase [EC:2.7.4.3]
ENSG00000166866	0.641892	-0.639597	0.000144641	down	yes	MYO1A	protein_coding	chr12:57028517-57051198:-	gi|635066245|ref|XP_008001916.1|	PREDICTED: unconventional myosin-Ia isoform X1 [Chlorocebus sabaeus]	gi|365733628|ref|NM_001256041.1|	Homo sapiens myosin IA (MYO1A), transcript variant 1, mRNA	Q9UBC5	2096	0	Unconventional myosin-Ia	SPBC146.13c	529	3e-165	COG5022	pfam00063	Myosin_head	Myosin head (motor domain).	GO:0030033|microvillus assembly;GO:0007605|sensory perception of sound;GO:0051648|vesicle localization;	GO:0016324|apical plasma membrane;GO:0009925|basal plasma membrane;GO:0016323|basolateral plasma membrane;GO:0005903|brush border;GO:0030864|cortical actin cytoskeleton;GO:0005737|cytoplasm;GO:0031941|filamentous actin;GO:0016328|lateral plasma membrane;GO:0005902|microvillus;GO:0016459|myosin complex;GO:0044853|plasma membrane raft;	GO:0005524|ATP binding;GO:0003774|motor activity;	K10356	MYO1; myosin I
ENSG00000166922	0.550536	-0.861091	6.01977e-06	down	yes	SCG5	protein_coding	chr15:32641676-32697098:+	gi|530406300|ref|XP_005254652.1|	PREDICTED: neuroendocrine protein 7B2 isoform X1 [Homo sapiens]	gi|221139784|ref|NM_001144757.1|	Homo sapiens secretogranin V (SCG5), transcript variant 1, mRNA	A5A6J6	412	1e-142	Neuroendocrine protein 7B2	.	.	.	.	pfam05281	Secretogranin_V	Neuroendocrine protein 7B2 precursor (Secretogranin V). The neuroendocrine protein 7B2 has a critical role in the proteolytic conversion and activation of proPC2, the enzyme responsible for the proteolytic conversion of many peptide hormone precursors. The 7B2 protein acts as an intracellular binding protein for proPC2, facilitates its maturation, and is required for its enzymatic activity. Proce…	GO:0006886|intracellular protein transport;GO:0007218|neuropeptide signaling pathway;GO:0016486|peptide hormone processing;GO:0046883|regulation of hormone secretion;	GO:0005576|extracellular region;GO:0030141|secretory granule;	GO:0004857|enzyme inhibitor activity;GO:0005525|GTP binding;GO:0051082|unfolded protein binding;	.	.
ENSG00000167011	0.564505	-0.824941	0.00391052	down	yes	NAT16	protein_coding	chr7:101170493-101180276:-	gi|544419334|ref|XP_005549346.1|	PREDICTED: putative N-acetyltransferase 16 isoform X2 [Macaca fascicularis]	gi|284005401|ref|NM_198571.2|	Homo sapiens N-acetyltransferase 16 (GCN5-related, putative) (NAT16), mRNA	Q8N8M0	312	2e-104	Probable N-acetyltransferase 16	.	.	.	.	pfam13900	GVQW	Putative binding domain. This short domain is often found nested inside other longer domains. The function is not known, but the domain carries a highly conserved GVQW motif. The members are rich in proline and cysteine. This may be a binding domain.	GO:0006474|N-terminal protein amino acid acetylation;	GO:0031417|NatC complex;	GO:0004596|peptide alpha-N-acetyltransferase activity;	.	.
ENSG00000167880	0.565019	-0.823629	0.0261751	down	yes	EVPL	protein_coding	chr17:76004502-76027452:-	gi|156104874|ref|NP_001979.2|	envoplakin [Homo sapiens]	gi|156104873|ref|NM_001988.2|	Homo sapiens envoplakin (EVPL), mRNA	Q92817	205	1e-58	Envoplakin	.	.	.	.	pfam01576	Myosin_tail_1	Myosin tail. The myosin molecule is a multi-subunit complex made up of two heavy chains and four light chains it is a fundamental contractile protein found in all eukaryote cell types. This family consists of the coiled-coil myosin heavy chain tail region. The coiled-coil is composed of the tail from two molecules of myosin. These can then assemble into the macromolecular thick filament. The coil…	GO:0008544|epidermis development;GO:0031424|keratinization;GO:0030216|keratinocyte differentiation;GO:0018149|peptide cross-linking;	GO:0005913|cell-cell adherens junction;GO:0001533|cornified envelope;GO:0005737|cytoplasm;GO:0030057|desmosome;GO:0070062|extracellular exosome;GO:0045111|intermediate filament cytoskeleton;	GO:0098641|cadherin binding involved in cell-cell adhesion;GO:0030674|protein binding, bridging;GO:0005198|structural molecule activity;	K10383	EVPL; envoplakin
ENSG00000169067	1.94849	0.962355	1.03197e-06	up	yes	ACTBL2	protein_coding	chr5:57480016-57482809:-	gi|63055057|ref|NP_001017992.1|	beta-actin-like protein 2 [Homo sapiens]	gi|393290851|ref|NM_001017992.3|	Homo sapiens actin, beta-like 2 (ACTBL2), mRNA	Q562R1	787	0	Beta-actin-like protein 2	SPBC32H8.12c	691	0	COG5277	pfam00022	Actin	Actin.	.	GO:0005737|cytoplasm;GO:0005856|cytoskeleton;GO:0070062|extracellular exosome;GO:0005615|extracellular space;	GO:0005524|ATP binding;	.	.
ENSG00000169085	0.644491	-0.633768	0.0048112	down	yes	C8orf46	protein_coding	chr8:66460003-66518524:+	gi|207080228|ref|NP_001128851.1|	uncharacterized protein C8orf46 homolog [Pongo abelii]	gi|197304723|ref|NM_152765.3|	Homo sapiens chromosome 8 open reading frame 46 (C8orf46), mRNA	Q5R5R7	58.5	1e-09	Uncharacterized protein C8orf46 homolog	.	.	.	.	pfam15505	DUF4648	Domain of unknown function (DUF4648). This family of proteins is found in eukaryotes. Proteins in this family are typically between 115 and 207 amino acids in length.	.	.	.	.	.
ENSG00000169245	11.3988	3.5108	0.00764282	up	yes	CXCL10	protein_coding	chr4:76021117-76023497:-	gi|149999382|ref|NP_001556.2|	C-X-C motif chemokine 10 precursor [Homo sapiens]	gi|323422857|ref|NM_001565.3|	Homo sapiens chemokine (C-X-C motif) ligand 10 (CXCL10), mRNA	P02778	193	6e-59	C-X-C motif chemokine 10	.	.	.	.	pfam00048	IL8	Small cytokines (intecrine/chemokine), interleukin-8 like. Includes a number of secreted growth factors and interferons involved in mitogenic, chemotactic, and inflammatory activity. Structure contains two highly conserved disulfide bonds.	GO:0008015|blood circulation;GO:0007166|cell surface receptor signaling pathway;GO:0007267|cell-cell signaling;GO:0034605|cellular response to heat;GO:0071222|cellular response to lipopolysaccharide;GO:0070098|chemokine-mediated signaling pathway;GO:0006935|chemotaxis;GO:0051607|defense response to virus;GO:0042118|endothelial cell activation;GO:0007186|G-protein coupled receptor signaling pathwa…	GO:0009897|external side of plasma membrane;GO:0005576|extracellular region;GO:0005615|extracellular space;	GO:0008603|cAMP-dependent protein kinase regulator activity;GO:0008009|chemokine activity;GO:0048248|CXCR3 chemokine receptor binding;GO:0008201|heparin binding;GO:0005102|receptor binding;	K12671	CXCL10, IP10; C-X-C motif chemokine 10
ENSG00000169435	2.16926	1.1172	0.0180861	up	yes	RASSF6	protein_coding	chr4:73571550-73620631:-	gi|795623775|ref|XP_011732063.1|	PREDICTED: ras association domain-containing protein 6 isoform X1 [Macaca nemestrina]	gi|393715058|ref|NM_177532.4|	Homo sapiens Ras association (RalGDS/AF-6) domain family member 6 (RASSF6), transcript variant 1, mRNA	Q6ZTQ3	764	0	Ras association domain-containing protein 6	.	.	.	.	pfam13900	GVQW	Putative binding domain. This short domain is often found nested inside other longer domains. The function is not known, but the domain carries a highly conserved GVQW motif. The members are rich in proline and cysteine. This may be a binding domain.	GO:0006915|apoptotic process;GO:0042981|regulation of apoptotic process;GO:0007165|signal transduction;	.	.	K09854	RASSF6; Ras association domain-containing protein 6
ENSG00000169618	3.38211	1.75793	0.034087	up	yes	PROKR1	protein_coding	chr2:68643589-68658247:+	gi|795160098|ref|XP_011840388.1|	PREDICTED: prokineticin receptor 1 [Mandrillus leucophaeus]	gi|19774656|gb|AC105054.6|	Homo sapiens BAC clone RP11-722I12 from 2, complete sequence	Q8TCW9	784	0	Prokineticin receptor 1	.	.	.	.	pfam00001	7tm_1	7 transmembrane receptor (rhodopsin family). This family contains, amongst other G-protein-coupled receptors (GCPRs), members of the opsin family, which have been considered to be typical members of the rhodopsin superfamily. They share several motifs, mainly the seven transmembrane helices, GCPRs of the rhodopsin superfamily. All opsins bind a chromophore, such as 11-cis-retinal. The function of…	GO:0007166|cell surface receptor signaling pathway;GO:0007623|circadian rhythm;GO:0007186|G-protein coupled receptor signaling pathway;GO:0043066|negative regulation of apoptotic process;	GO:0005887|integral component of plasma membrane;GO:0005886|plasma membrane;	GO:0004930|G-protein coupled receptor activity;GO:0004983|neuropeptide Y receptor activity;	K08379	PROKR1; prokineticin receptor 1
ENSG00000170296	0.545982	-0.873076	0.0321859	down	yes	GABARAP	protein_coding	chr17:7240014-7242770:-	gi|148680564|gb|EDL12511.1|	gamma-aminobutyric acid receptor associated protein, isoform CRA_a [Mus musculus]	gi|426383878|ref|XM_004058456.1|	PREDICTED: Gorilla gorilla gorilla GABA(A) receptor-associated protein (GABARAP), mRNA	P60517	239	1e-74	Gamma-aminobutyric acid receptor-associated protein	.	.	.	.	pfam02991	Atg8	Autophagy protein Atg8 ubiquitin like. Light chain 3 is proposed to function primarily as a subunit of microtubule associated proteins 1A and 1B and that its expression may regulate microtubule binding activity. Autophagy is generally known as a process involved in the degradation of bulk cytoplasmic components that are non-specifically sequestered into an autophagosome, where they are sequestere…	GO:0000045|autophagosome assembly;GO:0006995|cellular response to nitrogen starvation;GO:0008625|extrinsic apoptotic signaling pathway via death domain receptors;GO:0000226|microtubule cytoskeleton organization;GO:0000422|mitophagy;GO:0015031|protein transport;	GO:0015629|actin cytoskeleton;GO:0005776|autophagosome;GO:0000421|autophagosome membrane;GO:0005930|axoneme;GO:0044297|cell body;GO:0031410|cytoplasmic vesicle;GO:0005829|cytosol;GO:0000139|Golgi membrane;GO:0005764|lysosome;GO:0005874|microtubule;GO:0005875|microtubule associated complex;GO:0048471|perinuclear region of cytoplasm;GO:0005886|plasma membrane;GO:0005790|smooth endoplasmic reticulum…	GO:0050811|GABA receptor binding;	K08341	GABARAP, ATG8, LC3; GABA(A) receptor-associated protein
ENSG00000170615	5.90812	2.5627	0.0327409	up	yes	SLC26A5	protein_coding	chr7:103352730-103446177:-	gi|31096302|gb|AAP43685.1|	prestin [Homo sapiens]	gi|269784649|ref|NM_198999.2|	Homo sapiens solute carrier family 26 (anion exchanger), member 5 (SLC26A5), transcript variant a, mRNA	P58743	451	6e-145	Prestin	PA1647	183	2e-48	COG0659	pfam00916	Sulfate_transp	Sulfate transporter family. Mutations in human SLC26A2 lead to several human diseases.	GO:0015701|bicarbonate transport;GO:1902476|chloride transmembrane transport;GO:0090102|cochlea development;GO:0015755|fructose transport;GO:0034766|negative regulation of ion transmembrane transport;GO:2000147|positive regulation of cell motility;GO:0045793|positive regulation of cell size;GO:0051262|protein tetramerization;GO:0008360|regulation of cell shape;GO:0051453|regulation of intracellul…	GO:0016323|basolateral plasma membrane;GO:0005737|cytoplasm;GO:0005887|integral component of plasma membrane;GO:0016328|lateral plasma membrane;	GO:0015301|anion:anion antiporter activity;GO:0015106|bicarbonate transmembrane transporter activity;GO:0005254|chloride channel activity;GO:0019531|oxalate transmembrane transporter activity;GO:0008271|secondary active sulfate transmembrane transporter activity;GO:0015116|sulfate transmembrane transporter activity;	K14703	SLC26A5, PRES; solute carrier family 26, member 5
ENSG00000170959	0.656219	-0.607751	0.00101314	down	yes	DCDC1	protein_coding	chr11:30830369-31369810:-	gi|694943990|ref|XP_009458458.1|	PREDICTED: LOW QUALITY PROTEIN: doublecortin domain-containing protein 5 [Pan troglodytes]	gi|544486726|ref|XM_005578297.1|	PREDICTED: Macaca fascicularis doublecortin domain containing 1 (DCDC1), transcript variant X8, mRNA	P59894	72.8	5e-12	Doublecortin domain-containing protein 1	.	.	.	.	pfam13900	GVQW	Putative binding domain. This short domain is often found nested inside other longer domains. The function is not known, but the domain carries a highly conserved GVQW motif. The members are rich in proline and cysteine. This may be a binding domain.	GO:0035556|intracellular signal transduction;	GO:0005737|cytoplasm;	.	.	.
ENSG00000171056	1.59298	0.671727	0.0433878	up	yes	SOX7	protein_coding	chr8:10723768-10730512:-	gi|13899269|ref|NP_113627.1|	transcription factor SOX-7 [Homo sapiens]	gi|525342676|ref|NM_031439.3|	Homo sapiens SRY (sex determining region Y)-box 7 (SOX7), mRNA	Q9BT81	741	0	Transcription factor SOX-7	.	.	.	.	pfam12067	Sox_C_TAD	Sox C-terminal transactivation domain. This domain is found at the C-terminus of the Sox family of transcription factors. It is found associated with pfam00505. It binds to the Armadillo repeats (pfam00514) in Catenin beta-1 (CTNNB1), which is involved in transcriptional regulation. It functions as a transactivating domain (TAD).	GO:0001706|endoderm formation;GO:0008285|negative regulation of cell proliferation;GO:0045892|negative regulation of transcription, DNA-templated;GO:0043280|positive regulation of cysteine-type endopeptidase activity involved in apoptotic process;GO:0045893|positive regulation of transcription, DNA-templated;GO:0060828|regulation of canonical Wnt signaling pathway;GO:0006351|transcription, DNA-te…	GO:0005737|cytoplasm;GO:0005654|nucleoplasm;GO:0005634|nucleus;	GO:0043565|sequence-specific DNA binding;GO:0003705|transcription factor activity, RNA polymerase II distal enhancer sequence-specific binding;GO:0003700|transcription factor activity, sequence-specific DNA binding;GO:0044212|transcription regulatory region DNA binding;	K09270	SOX7S; transcription factor SOX7/8/10/18 (SOX group E/F)
ENSG00000171431	2.77548	1.47274	0.0472609	up	yes	KRT20	protein_coding	chr17:40875941-40885227:-	gi|27894337|ref|NP_061883.1|	keratin, type I cytoskeletal 20 [Homo sapiens]	gi|302191643|ref|NM_019010.2|	Homo sapiens keratin 20, type I (KRT20), mRNA	P35900	724	0	Keratin, type I cytoskeletal 20	.	.	.	.	pfam00038	Filament	Intermediate filament protein.	GO:0006915|apoptotic process;GO:0033554|cellular response to stress;GO:0045109|intermediate filament organization;GO:0050708|regulation of protein secretion;	GO:0005737|cytoplasm;GO:0005882|intermediate filament;	GO:0005200|structural constituent of cytoskeleton;	K07604	KRT1; type I keratin, acidic
ENSG00000171804	0.224292	-2.15655	0.00730079	down	yes	WDR87	protein_coding	chr19:37884823-37906677:-	gi|597709787|ref|NP_001278017.1|	WD repeat-containing protein 87 isoform 1 [Homo sapiens]	gi|597709786|ref|NM_001291088.1|	Homo sapiens WD repeat domain 87 (WDR87), transcript variant 1, mRNA	Q6ZQQ6	3686	0	WD repeat-containing protein 87	.	.	.	.	pfam02463	SMC_N	RecF/RecN/SMC N terminal domain. This domain is found at the N terminus of SMC proteins. The SMC (structural maintenance of chromosomes) superfamily proteins have ATP-binding domains at the N- and C-termini, and two extended coiled-coil domains separated by a hinge in the middle. The eukaryotic SMC proteins form two kind of heterodimers: the SMC1/SMC3 and the SMC2/SMC4 types. These heterodimers c…	.	GO:0005737|cytoplasm;	.	.	.
ENSG00000171931	0.664784	-0.589042	0.0224763	down	yes	FBXW10	protein_coding	chr17:18744024-18779349:+	gi|578829637|ref|XP_006721483.1|	PREDICTED: F-box/WD repeat-containing protein 10 isoform X7 [Homo sapiens]	gi|34192015|gb|BC028364.2|	Homo sapiens F-box and WD repeat domain containing 10, mRNA (cDNA clone MGC:26596 IMAGE:4827344), complete cds	Q5XX13	2151	0	F-box/WD repeat-containing protein 10	.	.	.	.	pfam13900	GVQW	Putative binding domain. This short domain is often found nested inside other longer domains. The function is not known, but the domain carries a highly conserved GVQW motif. The members are rich in proline and cysteine. This may be a binding domain.	.	.	.	K10266	FBXW10; F-box and WD-40 domain protein 10
ENSG00000172789	0.425795	-1.23177	0.0352229	down	yes	HOXC5	protein_coding	chr12:54032853-54035358:+	gi|821123439|ref|XP_012384048.1|	PREDICTED: homeobox protein Hox-C5 [Dasypus novemcinctus]	gi|426372799|ref|XM_004053256.1|	PREDICTED: Gorilla gorilla gorilla homeobox C5 (HOXC5), mRNA	P32043	384	9e-129	Homeobox protein Hox-C5	.	.	.	.	pfam00046	Homeobox	Homeobox domain.	GO:0009952|anterior/posterior pattern specification;GO:0048706|embryonic skeletal system development;GO:0006351|transcription, DNA-templated;	GO:0030054|cell junction;GO:0005654|nucleoplasm;	GO:0043565|sequence-specific DNA binding;GO:0003700|transcription factor activity, sequence-specific DNA binding;	K09305	HOX_5; homeobox protein HoxA/B/C5
ENSG00000173110	3.2077	1.68154	1.30713e-07	up	yes	HSPA6	protein_coding	chr1:161524540-161526910:+	gi|34419635|ref|NP_002146.2|	heat shock 70 kDa protein 6 [Homo sapiens]	gi|48374143|emb|AL590385.23|	Human DNA sequence from clone RP11-5K23 on chromosome 1, complete sequence	P17066	1212	0	Heat shock 70 kDa protein 6	.	.	.	.	pfam00012	HSP70	Hsp70 protein. Hsp70 chaperones help to fold many proteins. Hsp70 assisted folding involves repeated cycles of substrate binding and release. Hsp70 activity is ATP dependent. Hsp70 proteins are made up of two regions: the amino terminus is the ATPase domain and the carboxyl terminus is the substrate binding region.	GO:0034605|cellular response to heat;GO:0042026|protein refolding;GO:0006986|response to unfolded protein;	GO:0072562|blood microparticle;GO:0005814|centriole;GO:0005737|cytoplasm;GO:0005829|cytosol;GO:0070062|extracellular exosome;	GO:0005524|ATP binding;GO:0042623|ATPase activity, coupled;GO:0019899|enzyme binding;GO:0031072|heat shock protein binding;GO:0051082|unfolded protein binding;	K03283	HSPA1_8; heat shock 70kDa protein 1/8
ENSG00000173421	10.0231	3.32526	0.022926	up	yes	CCDC36	protein_coding	chr3:49198428-49258104:+	gi|206597547|ref|NP_835467.2|	coiled-coil domain-containing protein 36 [Homo sapiens]	gi|206597546|ref|NM_178173.3|	Homo sapiens coiled-coil domain containing 36 (CCDC36), transcript variant 1, mRNA	Q8IYA8	228	3e-69	Coiled-coil domain-containing protein 36	.	.	.	.	pfam13900	GVQW	Putative binding domain. This short domain is often found nested inside other longer domains. The function is not known, but the domain carries a highly conserved GVQW motif. The members are rich in proline and cysteine. This may be a binding domain.	.	.	.	.	.
ENSG00000173988	0.607901	-0.718091	0.0289611	down	yes	LRRC63	protein_coding	chr13:46211943-46277366:+	gi|540344560|ref|NP_001269389.1|	leucine-rich repeat-containing protein 63 [Homo sapiens]	gi|540344559|ref|NM_001282460.1|	Homo sapiens leucine rich repeat containing 63 (LRRC63), mRNA	Q05C16	1012	0	Leucine-rich repeat-containing protein 63	ECU09g0190	81.6	2e-15	COG4886	pfam13855	LRR_8	Leucine rich repeat.	.	.	.	.	.
ENSG00000174225	0.387541	-1.36758	0.0203436	down	yes	ARL13A	protein_coding	chrX:100969708-100990829:+	gi|308153411|sp|Q5H913.2|AR13A_HUMAN	RecName: Full=ADP-ribosylation factor-like protein 13A	gi|512125243|ref|NR_103709.1|	Homo sapiens ADP-ribosylation factor-like 13A (ARL13A), transcript variant 1, non-coding RNA	Q5H913	256	5e-83	ADP-ribosylation factor-like protein 13A	.	.	.	.	pfam00025	Arf	ADP-ribosylation factor family. Pfam combines a number of different Prosite families together	GO:0007264|small GTPase mediated signal transduction;	GO:0005622|intracellular;	GO:0005525|GTP binding;	K07961	ARL13; ADP-ribosylation factor-like protein 13
ENSG00000175267	0.58366	-0.7768	0.0105828	down	yes	VWA3A	protein_coding	chr16:22092538-22156966:+	gi|218505703|ref|NP_775886.3|	von Willebrand factor A domain-containing protein 3A precursor [Homo sapiens]	gi|589908380|ref|NM_173615.4|	Homo sapiens von Willebrand factor A domain containing 3A (VWA3A), mRNA	A6NCI4	221	0	von Willebrand factor A domain-containing protein 3A	.	.	.	.	pfam13768	VWA_3	von Willebrand factor type A domain.	.	GO:0005576|extracellular region;	.	.	.
ENSG00000175336	10.0226	3.32519	0.0268172	up	yes	APOF	protein_coding	chr12:56360569-56362823:-	gi|686741256|ref|XP_009246176.1|	PREDICTED: apolipoprotein F isoform X1 [Pongo abelii]	gi|60219574|emb|CR936663.1|	Homo sapiens mRNA; cDNA DKFZp781G18150 (from clone DKFZp781G18150)	Q13790	668	0	Apolipoprotein F	.	.	.	.	pfam15148	Apolipo_F	Apolipoprotein F.	GO:0008203|cholesterol metabolic process;GO:0006629|lipid metabolic process;GO:0006869|lipid transport;	GO:0005576|extracellular region;GO:0034364|high-density lipoprotein particle;GO:0034362|low-density lipoprotein particle;	GO:0015485|cholesterol binding;GO:0005319|lipid transporter activity;GO:0005102|receptor binding;	.	.
ENSG00000175985	0.666386	-0.58557	0.0179686	down	yes	PLEKHD1	protein_coding	chr14:69484692-69531551:+	gi|238908495|ref|NP_001154970.1|	pleckstrin homology domain-containing family D member 1 [Homo sapiens]	gi|34533382|dbj|AK126770.1|	Homo sapiens cDNA FLJ44817 fis, clone BRACE3045424	A6NEE1	778	0	Pleckstrin homology domain-containing family D member 1	.	.	.	.	pfam13900	GVQW	Putative binding domain. This short domain is often found nested inside other longer domains. The function is not known, but the domain carries a highly conserved GVQW motif. The members are rich in proline and cysteine. This may be a binding domain.	.	.	.	.	.
ENSG00000176236	0.59282	-0.754333	0.00406927	down	yes	C10orf111	antisense	chr10:15095385-15097319:-	gi|119606648|gb|EAW86242.1|	hCG2017590 [Homo sapiens]	gi|23397531|ref|NM_153244.1|	Homo sapiens chromosome 10 open reading frame 111 (C10orf111), mRNA	Q8N326	265	3e-84	Uncharacterized protein C10orf111	.	.	.	.	pfam13900	GVQW	Putative binding domain. This short domain is often found nested inside other longer domains. The function is not known, but the domain carries a highly conserved GVQW motif. The members are rich in proline and cysteine. This may be a binding domain.	.	GO:0016021|integral component of membrane;	.	.	.
ENSG00000177025	0.432102	-1.21056	0.0153578	down	yes	C19orf18	protein_coding	chr19:57958437-57974534:-	gi|22748999|ref|NP_689687.1|	uncharacterized protein C19orf18 precursor [Homo sapiens]	gi|257153403|ref|NM_152474.4|	Homo sapiens chromosome 19 open reading frame 18 (C19orf18), mRNA	Q8NEA5	375	1e-129	Uncharacterized protein C19orf18	.	.	.	.	pfam03025	Papilloma_E5	Papillomavirus E5. The E5 protein from papillomaviruses is about 80 amino acids long. The proteins are contain three regions that are predicted to be transmembrane alpha helices. The function of this protein is unknown.	.	GO:0070062|extracellular exosome;GO:0016021|integral component of membrane;	.	.	.
ENSG00000177096	0.447543	-1.1599	0.00137698	down	yes	FAM109B	protein_coding	chr22:42074251-42079441:+	gi|675728840|ref|XP_008965662.1|	PREDICTED: sesquipedalian-2 isoform X1 [Pan paniscus]	gi|115583656|ref|NM_001002034.2|	Homo sapiens family with sequence similarity 109, member B (FAM109B), mRNA	Q6ICB4	150	5e-43	Sesquipedalian-2	.	.	.	.	pfam00169	PH	PH domain. PH stands for pleckstrin homology.	GO:0007032|endosome organization;GO:0001881|receptor recycling;GO:0042147|retrograde transport, endosome to Golgi;	GO:0030136|clathrin-coated vesicle;GO:0005829|cytosol;GO:0005769|early endosome;GO:0055037|recycling endosome;GO:0005802|trans-Golgi network;	GO:0042803|protein homodimerization activity;	.	.
ENSG00000177599	0.227703	-2.13477	0.0228391	down	yes	ZNF491	protein_coding	chr19:11797667-11809622:+	gi|31542772|ref|NP_689569.2|	zinc finger protein 491 [Homo sapiens]	gi|87116672|ref|NM_152356.3|	Homo sapiens zinc finger protein 491 (ZNF491), mRNA	Q15973	34.3	3e-12	Zinc finger protein 124	.	.	.	.	pfam13465	zf-H2C2_2	Zinc-finger double domain.	GO:0006355|regulation of transcription, DNA-templated;GO:0006351|transcription, DNA-templated;	GO:0005634|nucleus;	GO:0003677|DNA binding;GO:0046872|metal ion binding;	K09228	KRAB; KRAB domain-containing zinc finger protein
ENSG00000178115	3.27598	1.71193	0.0243415	up	yes	GOLGA8Q	protein_coding	chr15:30552078-30562501:+	gi|542133086|ref|NP_001269423.1|	golgin A8 family, member N [Homo sapiens]	gi|542133085|ref|NM_001282494.1|	Homo sapiens golgin A8 family, member N (GOLGA8N), mRNA	F8WBI6	121	5e-30	Golgin subfamily A member 8N	.	.	.	.	pfam15070	GOLGA2L5	Putative golgin subfamily A member 2-like protein 5. The function of the GOLGA2L5 protein family remains unknown. This family of proteins is thought to be found in the Golgi apparatus of eukaryotes. Proteins in this family are typically between and 840 amino acids in length.	.	GO:0005794|Golgi apparatus;	.	.	.
ENSG00000178217	2.93887	1.55526	0.0178933	up	yes	SH2D4B	protein_coding	chr10:80537902-80646560:+	gi|224591406|ref|NP_997255.2|	SH2 domain-containing protein 4B isoform 1 [Homo sapiens]	gi|224591405|ref|NM_207372.2|	Homo sapiens SH2 domain containing 4B (SH2D4B), transcript variant 1, mRNA	A6X942	68.6	1e-10	SH2 domain-containing protein 4B	.	.	.	.	pfam12937	F-box-like	F-box-like. This is an F-box-like family.	.	.	.	.	.
ENSG00000179292	0.562914	-0.829014	1.37748e-06	down	yes	TMEM151A	protein_coding	chr11:66291870-66296664:+	gi|297688097|ref|XP_002821524.1|	PREDICTED: transmembrane protein 151A [Pongo abelii]	gi|34193308|gb|BC033898.2|	Homo sapiens transmembrane protein 151A, mRNA (cDNA clone MGC:33486 IMAGE:4813116), complete cds	Q8N4L1	835	0	Transmembrane protein 151A	.	.	.	.	pfam14857	TMEM151	TMEM151 family. This family of proteins is found in eukaryotes. Proteins in this family are typically between 338 and 558 amino acids in length.	.	GO:0016021|integral component of membrane;	.	.	.
ENSG00000179580	0.622973	-0.682759	0.0217313	down	yes	RNF151	protein_coding	chr16:1966823-1968975:+	gi|87241872|ref|NP_777563.2|	RING finger protein 151 [Homo sapiens]	gi|116686097|ref|NM_174903.4|	Homo sapiens ring finger protein 151 (RNF151), mRNA	Q2KHN1	402	1e-140	RING finger protein 151	.	.	.	.	pfam13639	zf-RING_2	Ring finger domain.	GO:0030154|cell differentiation;GO:0007283|spermatogenesis;	GO:0005737|cytoplasm;GO:0005634|nucleus;	GO:0004842|ubiquitin-protein transferase activity;GO:0008270|zinc ion binding;	.	.
ENSG00000181625	6.68314	2.74053	0.0473445	up	yes	SLX1B	protein_coding	chr16:29454501-29458219:+	gi|767896948|ref|XP_011506905.1|	PREDICTED: structure-specific endonuclease subunit SLX1-like isoform X1 [Homo sapiens]	gi|313103016|ref|NM_001014999.2|	Homo sapiens SLX1 structure-specific endonuclease subunit homolog A (S. cerevisiae) (SLX1A), transcript variant 1, mRNA	Q8WTZ3	49.3	3e-19	Zinc finger protein ENSP00000375192	.	.	.	.	pfam13900	GVQW	Putative binding domain. This short domain is often found nested inside other longer domains. The function is not known, but the domain carries a highly conserved GVQW motif. The members are rich in proline and cysteine. This may be a binding domain.	GO:0006355|regulation of transcription, DNA-templated;GO:0006351|transcription, DNA-templated;	GO:0005634|nucleus;	GO:0003677|DNA binding;GO:0046872|metal ion binding;	K15078	SLX1; structure-specific endonuclease subunit SLX1 [EC:3.6.1.-]
ENSG00000182179	0.61646	-0.697921	2.71741e-05	down	yes	UBA7	protein_coding	chr3:49805207-49813946:-	gi|477152|pir||A48195	ubiquitin-protein ligase E1 homolog - human	gi|38045947|ref|NM_003335.2|	Homo sapiens ubiquitin-like modifier activating enzyme 7 (UBA7), mRNA	P41226	1849	0	Ubiquitin-like modifier-activating enzyme 7	YKL210w	595	0	COG0476	pfam00899	ThiF	ThiF family. This family contains a repeated domain in ubiquitin activating enzyme E1 and members of the bacterial ThiF/MoeB/HesA family.	GO:0006464|cellular protein modification process;GO:0032020|ISG15-protein conjugation;GO:0019941|modification-dependent protein catabolic process;GO:0032480|negative regulation of type I interferon production;GO:0019985|translesion synthesis;	GO:0005829|cytosol;GO:0005654|nucleoplasm;GO:0005634|nucleus;	GO:0005524|ATP binding;GO:0019782|ISG15 activating enzyme activity;GO:0004839|ubiquitin activating enzyme activity;GO:0004842|ubiquitin-protein transferase activity;	K10698	UBE1L, UBA7; ubiquitin-activating enzyme E1-like [EC:6.2.1.45]
ENSG00000182324	0.659932	-0.59961	0.000336371	down	yes	KCNJ14	protein_coding	chr19:48455509-48466980:+	gi|544512476|ref|XP_005589827.1|	PREDICTED: ATP-sensitive inward rectifier potassium channel 14 [Macaca fascicularis]	gi|5771351|gb|AF081466.1|AF081466	Homo sapiens inward rectifier potassium channel (KIR2.4) mRNA, complete cds	Q9UNX9	758	0	ATP-sensitive inward rectifier potassium channel 14	.	.	.	.	pfam01007	IRK	Inward rectifier potassium channel.	GO:0061337|cardiac conduction;GO:0010107|potassium ion import;	GO:0030425|dendrite;GO:0043025|neuronal cell body;GO:0005886|plasma membrane;GO:0008076|voltage-gated potassium channel complex;	GO:0005242|inward rectifier potassium channel activity;	K05007	KCNJ14; potassium inwardly-rectifying channel subfamily J member 14
ENSG00000183734	0.153017	-2.70824	0.0214338	down	yes	ASCL2	protein_coding	chr11:2268495-2270952:-	gi|4885665|ref|NP_005161.1|	achaete-scute homolog 2 [Homo sapiens]	gi|42716308|ref|NM_005170.2|	Homo sapiens achaete-scute family bHLH transcription factor 2 (ASCL2), mRNA	Q99929	211	2e-62	Achaete-scute homolog 2	.	.	.	.	pfam00010	HLH	Helix-loop-helix DNA-binding domain.	GO:0010626|negative regulation of Schwann cell proliferation;GO:0000122|negative regulation of transcription from RNA polymerase II promoter;GO:0001890|placenta development;GO:0050767|regulation of neurogenesis;GO:0006355|regulation of transcription, DNA-templated;GO:0001666|response to hypoxia;GO:0035019|somatic stem cell population maintenance;GO:0060708|spongiotrophoblast differentiation;GO:00…	GO:0005737|cytoplasm;GO:0005634|nucleus;GO:0090575|RNA polymerase II transcription factor complex;	GO:0070888|E-box binding;GO:0000978|RNA polymerase II core promoter proximal region sequence-specific DNA binding;GO:0003700|transcription factor activity, sequence-specific DNA binding;GO:0001078|transcriptional repressor activity, RNA polymerase II core promoter proximal region sequence-specific binding;	K09067	ASCL; achaete-scute complex protein
ENSG00000183833	3.65809	1.87109	0.0430544	up	yes	MAATS1	protein_coding	chr3:119703022-119767102:+	gi|38569419|ref|NP_203528.2|	protein MAATS1 [Homo sapiens]	gi|145309296|ref|NM_033364.3|	Homo sapiens MYCBP-associated, testis expressed 1 (MAATS1), mRNA	Q7Z4T9	357	9e-117	Protein MAATS1	.	.	.	.	pfam14738	PaaSYMP	Solute carrier (proton/amino acid symporter), TRAMD3 or PAT1. PAT1 (proton amino acid transporter 1), also known as TRAMD3 of AAT-1, is the molecular correlate of the intestinal imino acid carrier. It is a proton-amino acid co-transporter having a stoichiometry of 1:1. Due to its mechanism, PAT1 activity increases at acidic pH, which correlates well with the acidic micro-climate close to the brus…	.	GO:0005739|mitochondrion;	.	.	.
ENSG00000184459	0.337262	-1.56806	0.0244684	down	yes	BPIFC	protein_coding	chr22:32413847-32464484:-	gi|28372551|ref|NP_777592.1|	BPI fold-containing family C protein precursor [Homo sapiens]	gi|229606121|ref|NM_174932.2|	Homo sapiens BPI fold containing family C (BPIFC), mRNA	Q8NFQ6	1034	0	BPI fold-containing family C protein	.	.	.	.	pfam01273	LBP_BPI_CETP	LBP / BPI / CETP family, N-terminal domain. The N and C terminal domains of the LBP/BPI/CETP family are structurally similar.	.	GO:0005615|extracellular space;	GO:0001530|lipopolysaccharide binding;GO:0005543|phospholipid binding;	.	.
ENSG00000184985	0.492357	-1.02222	0.0127598	down	yes	SORCS2	protein_coding	chr4:7192538-7742836:+	gi|170014689|ref|NP_065828.2|	VPS10 domain-containing receptor SorCS2 precursor [Homo sapiens]	gi|170014688|ref|NM_020777.2|	Homo sapiens sortilin-related VPS10 domain containing receptor 2 (SORCS2), mRNA	Q96PQ0	2127	0	VPS10 domain-containing receptor SorCS2	.	.	.	.	pfam00801	PKD	PKD domain. This domain was first identified in the Polycystic kidney disease protein PKD1. This domain has been predicted to contain an Ig-like fold.	GO:0007218|neuropeptide signaling pathway;	GO:0016021|integral component of membrane;GO:0016020|membrane;	GO:0008188|neuropeptide receptor activity;	.	.
ENSG00000186732	1.93947	0.955661	0.0434702	up	yes	MPPED1	protein_coding	chr22:43411196-43507848:+	gi|113204627|ref|NP_001037835.1|	metallophosphoesterase domain-containing protein 1 [Homo sapiens]	gi|113204626|ref|NM_001044370.1|	Homo sapiens metallophosphoesterase domain containing 1 (MPPED1), mRNA	O15442	241	1e-77	Metallophosphoesterase domain-containing protein 1	.	.	.	.	pfam00149	Metallophos	Calcineurin-like phosphoesterase. This family includes a diverse range of phosphoesterases, including protein phosphoserine phosphatases, nucleotidases, sphingomyelin phosphodiesterases and 2'-3' cAMP phosphodiesterases as well as nucleases such as bacterial SbcD or yeast MRE11. The most conserved regions in this superfamily centre around the metal chelating residues.	.	.	GO:0016787|hydrolase activity;	.	.
ENSG00000186832	0.350613	-1.51205	0.0248224	down	yes	KRT16	protein_coding	chr17:41609778-41615899:-	gi|635092418|ref|XP_008010895.1|	PREDICTED: keratin, type I cytoskeletal 16 isoform X1 [Chlorocebus sabaeus]	gi|163659905|ref|NM_005557.3|	Homo sapiens keratin 16, type I (KRT16), mRNA	P08779	638	0	Keratin, type I cytoskeletal 16	.	.	.	.	pfam00038	Filament	Intermediate filament protein.	GO:0007568|aging;GO:0008283|cell proliferation;GO:0007010|cytoskeleton organization;GO:0008544|epidermis development;GO:0061436|establishment of skin barrier;GO:0042633|hair cycle;GO:0006954|inflammatory response;GO:0045087|innate immune response;GO:0045104|intermediate filament cytoskeleton organization;GO:0031424|keratinization;GO:0030216|keratinocyte differentiation;GO:0051546|keratinocyte mig…	GO:0005856|cytoskeleton;GO:0070062|extracellular exosome;GO:0005882|intermediate filament;GO:0005634|nucleus;	GO:0005200|structural constituent of cytoskeleton;	K07604	KRT1; type I keratin, acidic
ENSG00000187094	2.74898	1.4589	0.0431265	up	yes	CCK	protein_coding	chr3:42257825-42266207:-	gi|297286036|ref|XP_002802883.1|	PREDICTED: cholecystokinin-like [Macaca mulatta]	gi|292494893|ref|NM_000729.4|	Homo sapiens cholecystokinin (CCK), transcript variant 1, mRNA	P06307	236	2e-77	Cholecystokinin	.	.	.	.	pfam00918	Gastrin	Gastrin/cholecystokinin family.	GO:0006919|activation of cysteine-type endopeptidase activity involved in apoptotic process;GO:0007409|axonogenesis;GO:0001662|behavioral fear response;GO:0042755|eating behavior;GO:0032099|negative regulation of appetite;GO:0001764|neuron migration;GO:0008284|positive regulation of cell proliferation;GO:0014049|positive regulation of glutamate secretion;GO:0051901|positive regulation of mitochon…	GO:0030424|axon;GO:0043203|axon hillock;GO:0043194|axon initial segment;GO:0030425|dendrite;GO:0005576|extracellular region;GO:0005615|extracellular space;GO:0043204|perikaryon;GO:0043195|terminal bouton;	GO:0005179|hormone activity;GO:0005184|neuropeptide hormone activity;	K05226	CCK; cholecystokinin
ENSG00000187105	0.616556	-0.697697	0.0467639	down	yes	HEATR4	protein_coding	chr14:73478484-73558947:-	gi|333805657|ref|NP_976054.2|	HEAT repeat-containing protein 4 [Homo sapiens]	gi|333805658|ref|NM_001220484.1|	Homo sapiens HEAT repeat containing 4 (HEATR4), transcript variant 1, mRNA	Q86WZ0	2019	0	HEAT repeat-containing protein 4	.	.	.	.	pfam13646	HEAT_2	HEAT repeats. This family includes multiple HEAT repeats.	.	.	.	.	.
ENSG00000187624	0.556633	-0.845201	0.00718447	down	yes	C17orf97	protein_coding	chr17:410327-431062:+	gi|257467573|ref|NP_001013694.4|	protein LIAT1 [Homo sapiens]	gi|257467572|ref|NM_001013672.4|	Homo sapiens chromosome 17 open reading frame 97 (C17orf97), mRNA	Q6ZQX7	124	1e-31	Protein LIAT1	.	.	.	.	pfam15242	FAM53	Family of FAM53. The FAM53 protein family refers to a family of proteins, which bind to a transcriptional regulator that modulates cell proliferation. It is known to be highly important in neural tube development. It is found in eukaryotes and is typically between 303 and 413 amino acids in length.	GO:0016598|protein arginylation;	.	.	.	.
ENSG00000187726	0.457661	-1.12765	0.0200201	down	yes	DNAJB13	protein_coding	chr11:73950319-73970366:+	gi|39204547|ref|NP_705842.2|	dnaJ homolog subfamily B member 13 [Homo sapiens]	gi|34808943|gb|AY138810.2|	Homo sapiens testis spermatogenesis apoptosis related gene 6 protein (TSARG6) mRNA, complete cds	P59910	231	2e-68	DnaJ homolog subfamily B member 13	.	.	.	.	pfam00226	DnaJ	DnaJ domain. DnaJ domains (J-domains) are associated with hsp70 heat-shock system and it is thought that this domain mediates the interaction. DnaJ-domain is therefore part of a chaperone (protein folding) system. The T-antigens, although not in Prosite are confirmed as DnaJ containing domains from literature.	GO:0006457|protein folding;	GO:0005930|axoneme;GO:0005737|cytoplasm;GO:0036126|sperm flagellum;	.	K09519	DNAJB13; DnaJ homolog subfamily B member 13
ENSG00000187944	0.451736	-1.14645	0.00147818	down	yes	C2orf66	protein_coding	chr2:196805002-196810276:-	gi|47106054|ref|NP_998773.1|	uncharacterized protein C2orf66 precursor [Homo sapiens]	gi|353681767|ref|NM_213608.2|	Homo sapiens chromosome 2 open reading frame 66 (C2orf66), mRNA	Q6UXQ4	183	2e-53	Uncharacterized protein C2orf66	.	.	.	.	pfam03125	Sre	C. elegans Sre G protein-coupled chemoreceptor. Caenorhabditis elegans Sre proteins are candidate chemosensory receptors. There are four main recognized groups of such receptors: Odr-10, Sra, Sro, and Srg. Sre (this family), Sra pfam02117 and Srb pfam02175 comprise the Sra group. All of the above receptors are thought to be G protein-coupled seven transmembrane domain proteins. The existence of s…	.	GO:0005576|extracellular region;	.	.	.
ENSG00000188487	1.65428	0.7262	0.00141546	up	yes	INSC	protein_coding	chr11:15112424-15247208:+	gi|99028953|ref|NP_001027024.3|	protein inscuteable homolog isoform a [Homo sapiens]	gi|507417924|ref|NM_001031853.4|	Homo sapiens inscuteable homolog (Drosophila) (INSC), transcript variant 1, mRNA	Q1MX18	88.2	9e-17	Protein inscuteable homolog	.	.	.	.	pfam13900	GVQW	Putative binding domain. This short domain is often found nested inside other longer domains. The function is not known, but the domain carries a highly conserved GVQW motif. The members are rich in proline and cysteine. This may be a binding domain.	GO:0030154|cell differentiation;GO:0007399|nervous system development;	GO:0005938|cell cortex;	.	.	.
ENSG00000188729	1.6129	0.689661	0.00130995	up	yes	OSTN	protein_coding	chr3:191199241-191265615:+	gi|38044108|ref|NP_937827.1|	osteocrin precursor [Homo sapiens]	gi|197101524|ref|NM_001134078.1|	Pongo abelii osteocrin (OSTN), mRNA	P61366	163	1e-44	Osteocrin	.	.	.	.	pfam11037	Musclin	Insulin-resistance promoting peptide in skeletal muscle. Musclin is a muscle derived secretory peptide which induces insulin resistance in vitro. It encodes a 130 amino acid sequence including a NH(2) terminal 30 amino acid signal sequence. Musclin expression level is tightly regulated by nutritional changes.	GO:0030154|cell differentiation;GO:0007166|cell surface receptor signaling pathway;GO:0003416|endochondral bone growth;GO:0007275|multicellular organismal development;GO:0046325|negative regulation of glucose import;GO:0045668|negative regulation of osteoblast differentiation;GO:0001503|ossification;GO:0030828|positive regulation of cGMP biosynthetic process;	GO:0005615|extracellular space;	.	.	.
ENSG00000188886	0.117321	-3.09147	0.0211236	down	yes	ASTL	protein_coding	chr2:96123850-96138436:-	gi|767918203|ref|XP_011509508.1|	PREDICTED: astacin-like metalloendopeptidase isoform X2 [Homo sapiens]	gi|157502168|ref|NM_001002036.3|	Homo sapiens astacin-like metallo-endopeptidase (M12 family) (ASTL), mRNA	Q6HA08	803	0	Astacin-like metalloendopeptidase	.	.	.	.	pfam01400	Astacin	Astacin (Peptidase family M12A). The members of this family are enzymes that cleave peptides. These proteases require zinc for catalysis. Members of this family contain two conserved disulphide bridges, these are joined 1-4 and 2-3. Members of this family have an amino terminal propeptide which is cleaved to give the active protease domain. All other linked domains are found to the carboxyl termi…	GO:0007155|cell adhesion;GO:0009566|fertilization;GO:2000360|negative regulation of binding of sperm to zona pellucida;GO:0010954|positive regulation of protein processing;GO:0060468|prevention of polyspermy;GO:0006508|proteolysis;	GO:0060473|cortical granule;GO:0005737|cytoplasm;GO:0005886|plasma membrane;GO:0030133|transport vesicle;	GO:0070001|aspartic-type peptidase activity;GO:0070002|glutamic-type peptidase activity;GO:0004222|metalloendopeptidase activity;GO:0008233|peptidase activity;GO:0008270|zinc ion binding;	K08778	ASTL; astacin-like metalloendopeptidase [EC:3.4.-.-]
ENSG00000189052	7.27419	2.86279	0.0311311	up	yes	CGB5	protein_coding	chr19:49043884-49045311:+	gi|281185508|sp|Q6NT52.4|CGB2_HUMAN	RecName: Full=Choriogonadotropin subunit beta variant 2; Flags: Precursor	gi|15451747|ref|NM_033043.1|	Homo sapiens chorionic gonadotropin, beta polypeptide 5 (CGB5), mRNA	Q6NT52	274	9e-91	Choriogonadotropin subunit beta variant 2	.	.	.	.	pfam00007	Cys_knot	Cystine-knot domain. The family comprises glycoprotein hormones and the C-terminal domain of various extracellular proteins. It is believed to be involved in disulfide-linked dimerization.	.	GO:0005576|extracellular region;	GO:0005179|hormone activity;	.	.
ENSG00000189292	0.551328	-0.859016	0.0364112	down	yes	FAM150B	protein_coding	chr2:279558-288851:-	gi|675694231|ref|XP_008958214.1|	PREDICTED: protein FAM150B [Pan paniscus]	gi|148228292|ref|NM_001002919.2|	Homo sapiens family with sequence similarity 150, member B (FAM150B), mRNA	Q6UX46	211	4e-68	Protein FAM150B	.	.	.	.	pfam15129	FAM150	FAM150 family. This family of proteins known as FAM150 is found in eukaryotes. Members of this family are as yet uncharacterized. Proteins in this family are approximately 143 amino acids in length. The function of this family has not, as yet, been determined, however it is predicted to be a secretory protein family.	GO:0070374|positive regulation of ERK1 and ERK2 cascade;GO:0070378|positive regulation of ERK5 cascade;GO:0010976|positive regulation of neuron projection development;	GO:0005576|extracellular region;	GO:0030298|receptor signaling protein tyrosine kinase activator activity;GO:0030971|receptor tyrosine kinase binding;	.	.
ENSG00000189409	0.467273	-1.09766	0.014656	down	yes	MMP23B	protein_coding	chr1:1632095-1635263:+	gi|795362609|ref|XP_011786394.1|	PREDICTED: matrix metalloproteinase-23 [Colobus angolensis palliatus]	gi|194387387|dbj|AK297700.1|	Homo sapiens cDNA FLJ60714 complete cds, highly similar to Homo sapiens matrix metallopeptidase 23B (MMP23B), mRNA	O75900	228	2e-113	Matrix metalloproteinase-23	.	.	.	.	pfam00413	Peptidase_M10	Matrixin. The members of this family are enzymes that cleave peptides. These proteases require zinc for catalysis.	GO:0006508|proteolysis;GO:0000003|reproduction;	GO:0005789|endoplasmic reticulum membrane;GO:0016021|integral component of membrane;GO:0005622|intracellular;GO:0005578|proteinaceous extracellular matrix;	GO:0004222|metalloendopeptidase activity;GO:0008237|metallopeptidase activity;GO:0008270|zinc ion binding;	K08001	MMP23; matrix metalloproteinase-23 (CA-MMP) [EC:3.4.24.-]
ENSG00000196724	0.644034	-0.634791	0.00678742	down	yes	ZNF418	protein_coding	chr19:57921884-57935393:-	gi|578833969|ref|XP_006723086.1|	PREDICTED: zinc finger protein 418 isoform X1 [Homo sapiens]	gi|52138522|ref|NM_133460.1|	Homo sapiens zinc finger protein 418 (ZNF418), mRNA	Q8TF45	1269	0	Zinc finger protein 418	.	.	.	.	pfam01352	KRAB	KRAB box. The KRAB domain (or Kruppel-associated box) is present in about a third of zinc finger proteins containing C2H2 fingers. The KRAB domain is found to be involved in protein-protein interactions. The KRAB domain is generally encoded by two exons. The regions coded by the two exons are known as KRAB-A and KRAB-B. The A box plays an important role in repression by binding to corepressors, w…	GO:0045892|negative regulation of transcription, DNA-templated;GO:0006351|transcription, DNA-templated;	GO:0005634|nucleus;	GO:0046872|metal ion binding;GO:0000977|RNA polymerase II regulatory region sequence-specific DNA binding;GO:0003700|transcription factor activity, sequence-specific DNA binding;	K09228	KRAB; KRAB domain-containing zinc finger protein
ENSG00000196754	0.635039	-0.655082	0.0205764	down	yes	S100A2	protein_coding	chr1:153561108-153567890:-	gi|114152869|sp|P29034.3|S10A2_HUMAN	RecName: Full=Protein S100-A2; AltName: Full=CAN19; AltName: Full=Protein S-100L; AltName: Full=S100 calcium-binding protein A2	gi|426331649|ref|XM_004026742.1|	PREDICTED: Gorilla gorilla gorilla S100 calcium binding protein A2, transcript variant 1 (S100A2), mRNA	P29034	106	4e-46	Protein S100-A2	.	.	.	.	pfam01023	S_100	S-100/ICaBP type calcium binding domain. The S-100 domain is a subfamily of the EF-hand calcium binding proteins.	GO:0043542|endothelial cell migration;	.	GO:0005509|calcium ion binding;GO:0042802|identical protein binding;	.	.
ENSG00000196946	0.295411	-1.75921	0.0229735	down	yes	ZNF705A	protein_coding	chr12:8138137-8188537:+	gi|51972236|ref|NP_001004328.1|	zinc finger protein 705A [Homo sapiens]	gi|132626839|ref|NM_001004328.2|	Homo sapiens zinc finger protein 705A (ZNF705A), mRNA	Q6ZN79	434	9e-153	Zinc finger protein 705A	.	.	.	.	pfam01352	KRAB	KRAB box. The KRAB domain (or Kruppel-associated box) is present in about a third of zinc finger proteins containing C2H2 fingers. The KRAB domain is found to be involved in protein-protein interactions. The KRAB domain is generally encoded by two exons. The regions coded by the two exons are known as KRAB-A and KRAB-B. The A box plays an important role in repression by binding to corepressors, w…	GO:0006355|regulation of transcription, DNA-templated;GO:0006351|transcription, DNA-templated;	GO:0005634|nucleus;	GO:0003677|DNA binding;GO:0046872|metal ion binding;	K09228	KRAB; KRAB domain-containing zinc finger protein
ENSG00000197520	8.51439	3.0899	0.0123784	up	yes	FAM177B	protein_coding	chr1:222737207-222750805:+	gi|125346184|ref|NP_997351.2|	protein FAM177B [Homo sapiens]	gi|34531607|dbj|AK125494.1|	Homo sapiens cDNA FLJ43505 fis, clone PEBLM2007140	A6PVY3	174	4e-54	Protein FAM177B	.	.	.	.	pfam14774	FAM177	FAM177 family. This family of proteins is found in eukaryotes. Proteins in this family are typically between 134 and 205 amino acids in length.	.	.	.	.	.
ENSG00000197585	2.09667	1.0681	0.00748342	up	yes	AC107218.3	antisense	chr2:214250040-214684246:-	.	.	gi|551848428|tpe|HG495187.1|	TPA: Homo sapiens long non-coding RNA OTTHUMT00000337269.2 (AC107218.3 gene), antisense	.	.	.	.	.	.	.	.	pfam06864	PAP_PilO	Pilin accessory protein (PilO). This family consists of several enterobacterial PilO proteins. The function of PilO is unknown although it has been suggested that it is a cytoplasmic protein in the absence of other Pil proteins, but PilO protein is translocated to the outer membrane in the presence of other Pil proteins. Alternatively, PilO protein may form a complex with other Pil protein(s). Pi…	.	.	.	.	.
ENSG00000197921	2.01746	1.01254	4.90912e-11	up	yes	HES5	protein_coding	chr1:2528745-2530245:-	gi|675667749|ref|XP_002750255.2|	PREDICTED: transcription factor HES-5 [Callithrix jacchus]	gi|218751905|ref|NM_001010926.3|	Homo sapiens hes family bHLH transcription factor 5 (HES5), mRNA	Q03062	254	5e-81	Transcription factor HES-5	.	.	.	.	pfam00010	HLH	Helix-loop-helix DNA-binding domain.	GO:0048708|astrocyte differentiation;GO:0042491|auditory receptor cell differentiation;GO:0042668|auditory receptor cell fate determination;GO:0007420|brain development;GO:0043010|camera-type eye development;GO:0051216|cartilage development;GO:0007155|cell adhesion;GO:0048469|cell maturation;GO:0022010|central nervous system myelination;GO:0072049|comma-shaped body morphogenesis;GO:0090162|establ…	GO:0005634|nucleus;	GO:0003682|chromatin binding;GO:0003690|double-stranded DNA binding;GO:0001078|transcriptional repressor activity, RNA polymerase II core promoter proximal region sequence-specific binding;	K06055	HES5; hairy and enhancer of split 5
ENSG00000198156	0.655792	-0.608689	0.00064369	down	yes	NPIPB6	protein_coding	chr16:28342555-28363508:-	gi|542133101|ref|NP_001269453.1|	nuclear pore complex-interacting protein family member B6 [Homo sapiens]	gi|187957139|gb|BC157836.1|	Homo sapiens hypothetical LOC728741, mRNA (cDNA clone MGC:189731 IMAGE:9057055), complete cds	E9PJ23	661	0	Nuclear pore complex-interacting protein family member B6	.	.	.	.	pfam06409	NPIP	Nuclear pore complex interacting protein (NPIP). This family consists of a series of primate specific nuclear pore complex interacting protein (NPIP) sequences. The function of this family is unknown but is well conserved from African apes to humans.	.	.	.	.	.
ENSG00000198650	0.49749	-1.00726	0.0226749	down	yes	TAT	protein_coding	chr16:71565660-71577130:-	gi|4507369|ref|NP_000344.1|	tyrosine aminotransferase [Homo sapiens]	gi|426382802|ref|XM_004057942.1|	PREDICTED: Gorilla gorilla gorilla tyrosine aminotransferase (TAT), mRNA	P17735	944	0	Tyrosine aminotransferase	PAB1810	166	6e-43	COG0436	pfam00155	Aminotran_1_2	Aminotransferase class I and II.	GO:0006103|2-oxoglutarate metabolic process;GO:0009058|biosynthetic process;GO:0006536|glutamate metabolic process;GO:0006559|L-phenylalanine catabolic process;GO:0051384|response to glucocorticoid;GO:0046689|response to mercury ion;GO:0006979|response to oxidative stress;GO:0006572|tyrosine catabolic process;	GO:0005829|cytosol;GO:0005739|mitochondrion;	GO:0016597|amino acid binding;GO:0080130|L-phenylalanine:2-oxoglutarate aminotransferase activity;GO:0004838|L-tyrosine:2-oxoglutarate aminotransferase activity;GO:0030170|pyridoxal phosphate binding;	K00815	TAT; tyrosine aminotransferase [EC:2.6.1.5]
ENSG00000198739	0.308316	-1.69752	0.0394754	down	yes	LRRTM3	protein_coding	chr10:66926006-67099830:+	gi|109809759|ref|NP_821079.3|	leucine-rich repeat transmembrane neuronal protein 3 precursor [Homo sapiens]	gi|602617447|ref|NM_178011.4|	Homo sapiens leucine rich repeat transmembrane neuronal 3 (LRRTM3), transcript variant 1, mRNA	Q9BGP6	1128	0	Leucine-rich repeat transmembrane neuronal protein 3	SPy1798	72	1e-11	COG4886	pfam13855	LRR_8	Leucine rich repeat.	.	GO:0030054|cell junction;GO:0016021|integral component of membrane;GO:0045211|postsynaptic membrane;	.	.	.
ENSG00000201654	8.72638	3.12538	0.0193085	up	yes	RNU6-7	snRNA	chr14:32202045-32202151:+	gi|537152882|gb|ERE72362.1|	membralin-like protein [Cricetulus griseus]	gi|530678047|ref|NR_104084.1|	Homo sapiens RNA, U6 small nuclear 7 (RNU6-7), small nuclear RNA	.	.	.	.	.	.	.	.	pfam08538	DUF1749	Protein of unknown function (DUF1749). This is a plant and fungal family of unknown function. This family contains many hypothetical proteins.	.	.	.	.	.
ENSG00000203327	4.45184	2.1544	0.0271386	up	yes	AC012358.7	antisense	chr2:55214387-55216126:-	gi|355565944|gb|EHH22373.1|	hypothetical protein EGK_05619, partial [Macaca mulatta]	gi|551845362|tpe|HG493983.1|	TPA: Homo sapiens long non-coding RNA OTTHUMT00000326452.1 (AC012358.7 gene), antisense	Q8N2A0	79.7	1e-16	Putative uncharacterized protein encoded by LINC00269	.	.	.	.	pfam13900	GVQW	Putative binding domain. This short domain is often found nested inside other longer domains. The function is not known, but the domain carries a highly conserved GVQW motif. The members are rich in proline and cysteine. This may be a binding domain.	.	.	.	.	.
ENSG00000203588	0.276921	-1.85245	0.00774983	down	yes	IGBP1-AS1	antisense	chrX:70163842-70165206:-	gi|119576138|gb|EAW55734.1|	hCG2038067, partial [Homo sapiens]	gi|551893776|tpe|HG512560.1|	TPA: Homo sapiens long non-coding RNA OTTHUMT00000057051.1 (RP13-46G5.5 gene), antisense	Q8N7I0	93.2	5e-22	Protein GVQW1	.	.	.	.	pfam13900	GVQW	Putative binding domain. This short domain is often found nested inside other longer domains. The function is not known, but the domain carries a highly conserved GVQW motif. The members are rich in proline and cysteine. This may be a binding domain.	.	.	.	.	.
ENSG00000203809	0.348731	-1.51982	0.0147656	down	yes	LIN28B-AS1	lincRNA	chr6:104864464-104941447:-	gi|426354145|ref|XP_004044528.1|	PREDICTED: uncharacterized protein LOC101147836 [Gorilla gorilla gorilla]	gi|12584726|emb|AL357315.14|	Human DNA sequence from clone RP11-809N15 on chromosome 6, complete sequence	Q8N2A0	48.9	1e-24	Putative uncharacterized protein encoded by LINC00269	.	.	.	.	pfam13900	GVQW	Putative binding domain. This short domain is often found nested inside other longer domains. The function is not known, but the domain carries a highly conserved GVQW motif. The members are rich in proline and cysteine. This may be a binding domain.	GO:0006355|regulation of transcription, DNA-templated;GO:0006351|transcription, DNA-templated;	GO:0005634|nucleus;	GO:0003677|DNA binding;GO:0046872|metal ion binding;GO:0003700|transcription factor activity, sequence-specific DNA binding;	K09228	KRAB; KRAB domain-containing zinc finger protein
ENSG00000203811	0.421061	-1.2479	0.0127708	down	yes	HIST2H3C	protein_coding	chr1:149839538-149841193:-	gi|528759927|gb|EPY79586.1|	histone H3.2-like protein [Camelus ferus]	gi|329755378|gb|AC244432.1|	Homo sapiens FOSMID clone COR2A-DD0002SD0NU_O11 from chromosome 1, complete sequence	P84239	273	1e-87	Histone H3	.	.	.	.	pfam00125	Histone	Core histone H2A/H2B/H3/H4.	.	GO:0000786|nucleosome;GO:0005634|nucleus;	GO:0003677|DNA binding;	.	.
ENSG00000203812	0.533891	-0.905383	0.0152321	down	yes	HIST2H2AA3	protein_coding	chr1:149842188-149842736:-	gi|685517581|ref|XP_009178380.1|	PREDICTED: histone H2A type 2-A-like [Papio anubis]	gi|329755378|gb|AC244432.1|	Homo sapiens FOSMID clone COR2A-DD0002SD0NU_O11 from chromosome 1, complete sequence	P0CC09	219	2e-71	Histone H2A type 2-A	SPAC19G12.06c	182	9e-58	COG5262	pfam00125	Histone	Core histone H2A/H2B/H3/H4.	GO:0006342|chromatin silencing;	GO:0070062|extracellular exosome;GO:0000790|nuclear chromatin;GO:0000786|nucleosome;	GO:0003677|DNA binding;	K11251	H2A; histone H2A
ENSG00000203819	0.491517	-1.02469	1.18787e-18	down	yes	HIST2H2BC	processed_pseudogene	chr1:149850193-149850772:-	gi|74709215|sp|Q6DN03.3|H2B2C_HUMAN	RecName: Full=Putative histone H2B type 2-C; AltName: Full=Histone H2B.t; Short=H2B/t	gi|329755378|gb|AC244432.1|	Homo sapiens FOSMID clone COR2A-DD0002SD0NU_O11 from chromosome 1, complete sequence	Q6DN03	236	3e-77	Putative histone H2B type 2-C	.	.	.	.	pfam00125	Histone	Core histone H2A/H2B/H3/H4.	GO:0006334|nucleosome assembly;	GO:0000788|nuclear nucleosome;	GO:0003677|DNA binding;	.	.
ENSG00000204323	0.628436	-0.670163	0.0461302	down	yes	SMIM5	protein_coding	chr17:75633434-75641404:+	gi|767995564|ref|XP_011523418.1|	PREDICTED: small integral membrane protein 5 isoform X2 [Homo sapiens]	gi|258547106|ref|NR_028439.1|	Homo sapiens small integral membrane protein 5 (SMIM5), transcript variant 2, non-coding RNA	Q71RC9	85.5	1e-18	Small integral membrane protein 5	.	.	.	.	pfam13900	GVQW	Putative binding domain. This short domain is often found nested inside other longer domains. The function is not known, but the domain carries a highly conserved GVQW motif. The members are rich in proline and cysteine. This may be a binding domain.	.	GO:0016021|integral component of membrane;	.	.	.
ENSG00000204449	0.118075	-3.08223	0.0161557	down	yes	TRIM49C	protein_coding	chr11:90031106-90042025:+	gi|305377072|ref|NP_001182163.1|	tripartite motif-containing protein 49C [Homo sapiens]	gi|305377071|ref|NM_001195234.1|	Homo sapiens tripartite motif containing 49C (TRIM49C), mRNA	P0CI26	923	0	Tripartite motif-containing protein 49C	.	.	.	.	pfam00622	SPRY	SPRY domain. SPRY Domain is named from SPla and the RYanodine Receptor. Domain of unknown function. Distant homologues are domains in butyrophilin/marenostrin/pyrin homologues.	.	GO:0005622|intracellular;	GO:0008270|zinc ion binding;	K12019	TRIM43S; tripartite motif-containing protein 43/48/49/64/77
ENSG00000204815	0.651955	-0.617155	4.95821e-09	down	yes	TTC25	protein_coding	chr17:41930635-41965651:+	gi|13899233|ref|NP_113609.1|	tetratricopeptide repeat protein 25 [Homo sapiens]	gi|586798124|ref|NM_031421.3|	Homo sapiens tetratricopeptide repeat domain 25 (TTC25), transcript variant 1, mRNA	Q96NG3	1300	0	Tetratricopeptide repeat protein 25	.	.	.	.	pfam13424	TPR_12	Tetratricopeptide repeat.	.	GO:0005737|cytoplasm;	.	.	.
ENSG00000204936	8.73586	3.12695	0.0306622	up	yes	CD177	protein_coding	chr19:43353659-43363172:+	gi|110735433|ref|NP_065139.2|	CD177 antigen precursor [Homo sapiens]	gi|619534194|ref|NM_020406.3|	Homo sapiens CD177 molecule (CD177), mRNA	Q8N6Q3	230	3e-72	CD177 antigen	.	.	.	.	pfam00021	UPAR_LY6	u-PAR/Ly-6 domain. This extracellular disulphide bond rich domain is related to pfam00087.	GO:0007596|blood coagulation;GO:0050900|leukocyte migration;	GO:0031225|anchored component of membrane;GO:0070062|extracellular exosome;GO:0005886|plasma membrane;	.	K06552	CD177, PRV1; CD177 antigen
ENSG00000205482	0.638411	-0.647443	0.0216313	down	yes	SPDYE18	unprocessed_pseudogene	chr7:77052785-77060512:-	gi|530386764|ref|XP_005250799.1|	PREDICTED: putative speedy protein-like protein 2 isoform X1 [Homo sapiens]	gi|394800011|gb|JQ023160.1|	Homo sapiens Speedy B2-like 1 (SPDYB2-L1) mRNA, complete cds	Q495Y8	68.9	2e-11	Speedy protein E2	.	.	.	.	pfam11357	Spy1	Cell cycle regulatory protein. Speedy (Spy1) is a cell cycle regulatory protein which activates CDK2, the major kinase that allows progression through G1/S phase and further replication events. Spy1 expression overcomes a p27-induced cell cycle arrest to allow for DNA synthesis, so cell cycle progression occurs due to an interaction between Spy1 and p27. Spy1 is also known as Ringo protein A.	.	.	.	K08694	SPDY, RINGO; speedy
ENSG00000205642	0.270857	-1.8844	0.0202102	down	yes	VCX3B	protein_coding	chrX:8464830-8466510:+	gi|119612023|gb|EAW91617.1|	hCG1988454, isoform CRA_c, partial [Homo sapiens]	gi|302565115|ref|NM_001001888.3|	Homo sapiens variable charge, X-linked 3B (VCX3B), mRNA	.	.	.	.	.	.	.	.	pfam01148	CTP_transf_1	Cytidylyltransferase family. The members of this family are integral membrane protein cytidylyltransferases. The family includes phosphatidate cytidylyltransferase EC:2.7.7.41 as well as Sec59 from yeast. Sec59 is a dolichol kinase EC:2.7.1.108.	.	.	.	.	.
ENSG00000205832	0.600369	-0.736079	0.00404032	down	yes	C16orf96	protein_coding	chr16:4556490-4600714:+	gi|397488212|ref|XP_003815163.1|	PREDICTED: LOW QUALITY PROTEIN: putative uncharacterized protein C16orf96 homolog [Pan paniscus]	gi|222446619|ref|NM_001145011.1|	Homo sapiens chromosome 16 open reading frame 96 (C16orf96), mRNA	A6NNT2	633	0	Uncharacterized protein C16orf96	.	.	.	.	pfam06160	EzrA	Septation ring formation regulator, EzrA. During the bacterial cell cycle, the tubulin-like cell-division protein FtsZ polymerizes into a ring structure that establishes the location of the nascent division site. EzrA modulates the frequency and position of FtsZ ring formation.	.	.	.	.	.
ENSG00000205835	2.98097	1.57578	0.0149947	up	yes	GMNC	protein_coding	chr3:190852877-190892429:-	gi|226442751|ref|NP_001140158.1|	geminin coiled-coil domain-containing protein 1 [Homo sapiens]	gi|254281260|ref|NM_001146686.2|	Homo sapiens geminin coiled-coil domain containing (GMNC), mRNA	A6NCL1	514	2e-171	Geminin coiled-coil domain-containing protein 1	.	.	.	.	pfam09457	RBD-FIP	FIP domain. The FIP domain is the Rab11-binding domain (RBD) at the C-terminus of a family of Rab11-interacting proteins (FIPs). The Rab proteins constitute the largest family of small GTPases (>60 members in mammals). Among them Rab11 is a well characterized regulator of endocytic and recycling pathways. Rab11 associates with a broad range of post-Golgi organelles, including recycling endosomes.	GO:0007049|cell cycle;GO:0008283|cell proliferation;GO:0006270|DNA replication initiation;	GO:0005634|nucleus;	GO:0003682|chromatin binding;	.	.
ENSG00000206881	0.135342	-2.88532	0.0357488	down	yes	RNU6-190P	snRNA	chr6:17619533-17619634:+	.	.	gi|12666206|emb|AL138824.19|	Human DNA sequence from clone RP11-14H3 on chromosome 6, complete sequence	.	.	.	.	.	.	.	.	pfam02233	PNTB	NAD(P) transhydrogenase beta subunit. This family corresponds to the beta subunit of NADP transhydrogenase in prokaryotes, and either the protein N- or C terminal in eukaryotes. The domain is often found in conjunction with pfam01262. Pyridine nucleotide transhydrogenase catalyses the reduction of NAD+ to NADPH. A complete loss of activity occurs upon mutation of Gly314 in Escherichia coli.	.	.	.	.	.
ENSG00000207088	6.49912	2.70024	0.0454282	up	yes	SNORA7B	snoRNA	chr3:129397210-129397348:-	gi|556719835|ref|XP_005955798.1|	PREDICTED: 60S ribosomal protein L32 isoform X1 [Pantholops hodgsonii]	gi|95007008|ref|NR_002992.2|	Homo sapiens small nucleolar RNA, H/ACA box 7B (SNORA7B), small nucleolar RNA	.	.	.	.	.	.	.	.	pfam14968	CCDC84	Coiled coil protein 84. The function of this coiled-coil domain-containing family is not known. It is found in eukaryotes.	.	.	.	.	.
ENSG00000212541	2.10648	1.07483	0.0277243	up	yes	RNU6-510P	snRNA	chr1:37991462-37991569:+	.	.	gi|30519815|emb|AL603790.41|	Human DNA sequence from clone RP11-100H21 on chromosome 1, complete sequence	.	.	.	.	.	.	.	.	pfam02705	K_trans	K+ potassium transporter. This is a family of K+ potassium transporters that are conserved across phyla, having both bacterial (KUP), yeast (HAK), and plant (AtKT) sequences as members.	.	.	.	.	.
ENSG00000213434	0.282941	-1.82143	0.040919	down	yes	VTI1BP2	processed_pseudogene	chr4:183483490-183484185:+	gi|640803766|ref|XP_008058252.1|	PREDICTED: vesicle transport through interaction with t-SNAREs homolog 1B [Tarsius syrichta]	gi|187830795|ref|NG_005181.3|	Homo sapiens vesicle transport through interaction with t-SNAREs 1B pseudogene 2 (VTI1BP2) on chromosome 4	Q2KIU0	402	3e-141	Vesicle transport through interaction with t-SNAREs homolog 1B	.	.	.	.	pfam12352	V-SNARE_C	Snare region anchored in the vesicle membrane C-terminus. Within the SNARE proteins interactions in the C-terminal half of the SNARE helix are critical to the driving of membrane fusion; whereas interactions in the N-terminal half of the SNARE domain are important for promoting priming or docking of the vesicle pfam05008.	GO:0006888|ER to Golgi vesicle-mediated transport;GO:0006896|Golgi to vacuole transport;GO:0006891|intra-Golgi vesicle-mediated transport;GO:0006623|protein targeting to vacuole;GO:0042147|retrograde transport, endosome to Golgi;GO:0048280|vesicle fusion with Golgi apparatus;	GO:0005829|cytosol;GO:0005789|endoplasmic reticulum membrane;GO:0012507|ER to Golgi transport vesicle membrane;GO:0005794|Golgi apparatus;GO:0016021|integral component of membrane;GO:0031902|late endosome membrane;GO:0005765|lysosomal membrane;GO:0031201|SNARE complex;	GO:0005484|SNAP receptor activity;GO:0000149|SNARE binding;	K08493	VTI1; vesicle transport through interaction with t-SNAREs 1
ENSG00000214212	0.639066	-0.645962	0.000102656	down	yes	C19orf38	protein_coding	chr19:10836575-10869790:+	gi|210147581|ref|NP_001129954.1|	protein HIDE1 precursor [Homo sapiens]	gi|210147580|ref|NM_001136482.1|	Homo sapiens chromosome 19 open reading frame 38 (C19orf38), mRNA	A8MVS5	345	4e-116	Protein HIDE1	.	.	.	.	pfam15548	DUF4655	Domain of unknown function (DUF4655). This family of proteins is found in eukaryotes. Proteins in this family are typically between 533 and 570 amino acids in length.	.	GO:0016021|integral component of membrane;	.	.	.
ENSG00000214694	0.625803	-0.67622	0.0216029	down	yes	ARHGEF33	protein_coding	chr2:38889880-38975449:+	gi|290463441|ref|NP_001138923.2|	rho guanine nucleotide exchange factor 33 [Homo sapiens]	gi|290463440|ref|NM_001145451.2|	Homo sapiens Rho guanine nucleotide exchange factor (GEF) 33 (ARHGEF33), mRNA	A8MVX0	140	5e-37	Rho guanine nucleotide exchange factor 33	.	.	.	.	pfam00621	RhoGEF	RhoGEF domain. Guanine nucleotide exchange factor for Rho/Rac/Cdc42-like GTPases Also called Dbl-homologous (DH) domain. It appears that pfam00169 domains invariably occur C-terminal to RhoGEF/DH domains.	GO:0035023|regulation of Rho protein signal transduction;	.	GO:0005089|Rho guanyl-nucleotide exchange factor activity;	.	.
ENSG00000214788	0.57981	-0.786347	0.0156034	down	yes	OOSP1	unitary_pseudogene	chr11:59938455-59995845:+	gi|426368672|ref|XP_004051328.1|	PREDICTED: uncharacterized protein LOC101147646 [Gorilla gorilla gorilla]	gi|72068977|dbj|AB231702.1|	Homo sapiens mRNA for hypothetical protein, partial sequence, clone:Hsa11-digit01-13-09-R	A8MZH6	248	8e-80	Putative oocyte-secreted protein 1 homolog	.	.	.	.	pfam00100	Zona_pellucida	Zona pellucida-like domain.	.	GO:0005576|extracellular region;	.	.	.
ENSG00000214855	0.573599	-0.801885	0.0336346	down	yes	APOC1P1	transcribed_unprocessed_pseudogene	chr19:44926804-44931386:+	gi|575773375|sp|P86336.2|APO1A_PANPA	RecName: Full=Apolipoprotein C-I, acidic form; Short=Apo-CIA; Short=ApoC-IA; AltName: Full=Apolipoprotein C1A; Contains: RecName: Full=Truncated apolipoprotein C-I, acidic form; Short=Apo-CIA'; Short=ApoC-IA'; Flags: Precursor [Pan paniscus]	gi|257470990|ref|NR_028412.1|	Homo sapiens apolipoprotein C-I pseudogene 1 (APOC1P1), transcript variant 1, non-coding RNA	P0CE37	128	5e-38	Apolipoprotein C-I, acidic form	.	.	.	.	pfam13900	GVQW	Putative binding domain. This short domain is often found nested inside other longer domains. The function is not known, but the domain carries a highly conserved GVQW motif. The members are rich in proline and cysteine. This may be a binding domain.	GO:0006869|lipid transport;GO:0042157|lipoprotein metabolic process;	GO:0005576|extracellular region;	.	.	.
ENSG00000215452	0.45962	-1.12149	0.0246306	down	yes	ZNF663P	unitary_pseudogene	chr20:46414228-46459276:-	gi|694979488|ref|XP_009435669.1|	PREDICTED: zinc finger protein 33B-like [Pan troglodytes]	gi|21732455|emb|AL831934.1|	Homo sapiens mRNA; cDNA DKFZp547G0215 (from clone DKFZp547G0215)	Q06730	85.1	4e-16	Zinc finger protein 33A	.	.	.	.	pfam13465	zf-H2C2_2	Zinc-finger double domain.	GO:0006355|regulation of transcription, DNA-templated;GO:0006351|transcription, DNA-templated;	GO:0005634|nucleus;	GO:0003677|DNA binding;GO:0046872|metal ion binding;GO:0003700|transcription factor activity, sequence-specific DNA binding;	K09228	KRAB; KRAB domain-containing zinc finger protein
ENSG00000215456	0.2189	-2.19165	0.019075	down	yes	BCRP4	unprocessed_pseudogene	chr22:22630061-22636153:+	gi|426393873|ref|XP_004063234.1|	PREDICTED: breakpoint cluster region protein-like [Gorilla gorilla gorilla]	gi|194381915|dbj|AK303241.1|	Homo sapiens cDNA FLJ58654 complete cds, highly similar to Breakpoint cluster region protein (EC 2.7.11.1)	P11274	114	1e-92	Breakpoint cluster region protein	.	.	.	.	pfam00620	RhoGAP	RhoGAP domain. GTPase activator proteins towards Rho/Rac/Cdc42-like small GTPases.	GO:0030036|actin cytoskeleton organization;GO:0007420|brain development;GO:0042472|inner ear morphogenesis;GO:0035556|intracellular signal transduction;GO:0060313|negative regulation of blood vessel remodeling;GO:0002692|negative regulation of cellular extravasation;GO:0050728|negative regulation of inflammatory response;GO:0043314|negative regulation of neutrophil degranulation;GO:0050885|neurom…	GO:0030054|cell junction;GO:0005829|cytosol;GO:0070062|extracellular exosome;GO:0016020|membrane;GO:0014069|postsynaptic density;GO:0045211|postsynaptic membrane;GO:0043234|protein complex;	GO:0005524|ATP binding;GO:0005096|GTPase activator activity;GO:0016301|kinase activity;GO:0004674|protein serine/threonine kinase activity;GO:0004713|protein tyrosine kinase activity;GO:0005089|Rho guanyl-nucleotide exchange factor activity;	K08878	BCR1, BCR; breakpoint cluster region protein [EC:2.7.11.1]
ENSG00000215529	0.409489	-1.2881	2.59682e-05	down	yes	EFCAB8	protein_coding	chr20:32858923-32961609:+	gi|768018744|ref|XP_011527423.1|	PREDICTED: EF-hand calcium-binding domain-containing protein 8 [Homo sapiens]	gi|544465056|ref|XM_005568709.1|	PREDICTED: Macaca fascicularis WD repeat-containing protein on Y chromosome-like (LOC102132495), transcript variant X2, mRNA	A8MWE9	298	5e-103	EF-hand calcium-binding domain-containing protein 8	.	.	.	.	pfam00400	WD40	WD domain, G-beta repeat.	.	.	GO:0005509|calcium ion binding;	.	.
ENSG00000216867	1.62175	0.697551	0.0214175	up	yes	AC114776.1	processed_pseudogene	chr2:110633947-110634333:+	gi|594030035|ref|XP_006040010.1|	PREDICTED: 60S ribosomal protein L22-like, partial [Bubalus bubalis]	gi|301337151|gb|AC241673.2|	Homo sapiens FOSMID clone ABC27-691M19 from chromosome 2, complete sequence	P67985	133	7e-39	60S ribosomal protein L22	.	.	.	.	pfam01776	Ribosomal_L22e	Ribosomal L22e protein family.	GO:0002181|cytoplasmic translation;	GO:0022625|cytosolic large ribosomal subunit;	GO:0008201|heparin binding;GO:0003723|RNA binding;GO:0003735|structural constituent of ribosome;	K02891	RP-L22e, RPL22; large subunit ribosomal protein L22e
ENSG00000219700	0.295534	-1.75861	0.0303965	down	yes	PTCHD3P3	processed_pseudogene	chr6:109288571-109290503:-	gi|327387674|gb|AEA72435.1|	PTCHD3 isoform 2 [Homo sapiens]	gi|331028460|ref|NG_028811.1|	Homo sapiens patched domain containing 3 pseudogene 3 (PTCHD3P3) on chromosome 6	Q3KNS1	263	9e-80	Patched domain-containing protein 3	.	.	.	.	pfam03251	Tymo_45kd_70kd	Tymovirus 45/70Kd protein. Tymoviruses are single stranded RNA viruses. This family includes a protein of unknown function that has been named based on its molecular weight. Tymoviruses such as the ononis yellow mosaic tymovirus encode only three proteins. Of these two are overlapping this protein overlaps a larger ORF that is thought to be the polymerase.	GO:0007286|spermatid development;	GO:0016021|integral component of membrane;GO:0097225|sperm midpiece;	.	.	.
ENSG00000220323	0.581804	-0.781396	4.35895e-11	down	yes	HIST2H2BD	processed_pseudogene	chr1:149843041-149843533:+	gi|74709219|sp|Q6DRA6.3|H2B2D_HUMAN	RecName: Full=Putative histone H2B type 2-D	gi|586597993|ref|NG_001226.5|	Homo sapiens histone cluster 2, H2bd (pseudogene) (HIST2H2BD) on chromosome 1	Q6DRA6	175	4e-54	Putative histone H2B type 2-D	.	.	.	.	pfam00125	Histone	Core histone H2A/H2B/H3/H4.	GO:0006334|nucleosome assembly;	GO:0070062|extracellular exosome;GO:0000788|nuclear nucleosome;	GO:0003677|DNA binding;	.	.
ENSG00000221867	0.26624	-1.9092	0.047267	down	yes	MAGEA3	protein_coding	chrX:152698752-152702347:+	gi|4885467|ref|NP_005353.1|	melanoma-associated antigen 3 [Homo sapiens]	gi|29029622|ref|NM_005362.3|	Homo sapiens melanoma antigen family A3 (MAGEA3), mRNA	P43357	331	3e-111	Melanoma-associated antigen 3	.	.	.	.	pfam01454	MAGE	MAGE family. The MAGE (melanoma antigen-encoding gene) family are expressed in a wide variety of tumors but not in normal cells, with the exception of the male germ cells, placenta, and, possibly, cells of the developing embryo. The cellular function of this family is unknown. This family also contains the yeast protein, Nse3. The Nse3 protein is part of the Smc5-6 complex. Nse3 has been demonstr…	GO:0043154|negative regulation of cysteine-type endopeptidase activity involved in apoptotic process;GO:1902236|negative regulation of endoplasmic reticulum stress-induced intrinsic apoptotic signaling pathway;GO:0010955|negative regulation of protein processing;	GO:0005783|endoplasmic reticulum;	GO:0089720|caspase binding;	.	.
ENSG00000222014	1.80879	0.855024	0.0357465	up	yes	RAB6C	protein_coding	chr2:129979664-129982738:+	gi|116875763|ref|NP_115520.2|	ras-related protein Rab-6C [Homo sapiens]	gi|116875762|ref|NM_032144.2|	Homo sapiens RAB6C, member RAS oncogene family (RAB6C), mRNA	Q9H0N0	512	7e-173	Ras-related protein Rab-6C	.	.	.	.	pfam00071	Ras	Ras family. Includes sub-families Ras, Rab, Rac, Ral, Ran, Rap Ypt1 and more. Shares P-loop motif with GTP_EFTU, arf and myosin_head. See pfam00009 pfam00025, pfam00063. As regards Rab GTPases, these are important regulators of vesicle formation, motility and fusion. They share a fold in common with all Ras GTPases: this is a six-stranded beta-sheet surrounded by five alpha-helices.	GO:0022402|cell cycle process;GO:0006891|intra-Golgi vesicle-mediated transport;GO:0010824|regulation of centrosome duplication;GO:0042493|response to drug;GO:0042147|retrograde transport, endosome to Golgi;GO:0006890|retrograde vesicle-mediated transport, Golgi to ER;GO:0007264|small GTPase mediated signal transduction;	GO:0005813|centrosome;GO:0005829|cytosol;GO:0005794|Golgi apparatus;GO:0005622|intracellular;GO:0005634|nucleus;	GO:0005525|GTP binding;GO:0003924|GTPase activity;	K07895	RAB6C; Ras-related protein Rab-6C
ENSG00000222489	6.6624	2.73604	0.0313477	up	yes	SNORA79	snoRNA	chr14:20323179-20323326:-	.	.	gi|17826631|emb|AL355075.6|	Human chromosome 14 DNA sequence BAC R-203M5 of library RPCI-11 from chromosome 14 of Homo sapiens (Human), complete sequence	.	.	.	.	.	.	.	.	pfam15489	CTC1	CST, telomere maintenance, complex subunit CTC1. CTC1 is one of the three components of the CST complex that assists Shelterin to protect the ends of telomeres from attack by DNA-repair mechanisms. Mutations in human CTC1 have been recognized as contributing to cerebroretinal microangiopathy.	.	.	.	.	.
ENSG00000223949	1.82074	0.864523	0.0328059	up	yes	ROR1-AS1	antisense	chr1:64094442-64171297:-	gi|2072951|gb|AAC51263.1|	putative p150 [Homo sapiens]	gi|551896549|tpe|HG492135.1|	TPA: Homo sapiens long non-coding RNA OTTHUMT00000025008.1 (RP11-24J23.2 gene), antisense	O00370	409	9e-158	LINE-1 retrotransposable element ORF2 protein	.	.	.	.	pfam13900	GVQW	Putative binding domain. This short domain is often found nested inside other longer domains. The function is not known, but the domain carries a highly conserved GVQW motif. The members are rich in proline and cysteine. This may be a binding domain.	GO:0006310|DNA recombination;GO:0090305|nucleic acid phosphodiester bond hydrolysis;GO:0032199|reverse transcription involved in RNA-mediated transposition;GO:0032197|transposition, RNA-mediated;	.	GO:0046872|metal ion binding;GO:0003964|RNA-directed DNA polymerase activity;GO:0009036|Type II site-specific deoxyribonuclease activity;	.	.
ENSG00000224114	2.59777	1.37727	0.0231396	up	yes	RP11-343H5.4	processed_pseudogene	chr1:206695837-206696269:-	gi|558099121|ref|XP_006082244.1|	PREDICTED: 40S ribosomal protein S14-like [Myotis lucifugus]	gi|342837712|ref|NG_029640.1|	Homo sapiens mitogen-activated protein kinase-activated protein kinase 2 (MAPKAPK2), RefSeqGene on chromosome 1	P62264	30.8	6e-54	40S ribosomal protein S14	YCR031c	89.4	4e-36	COG0100	pfam00411	Ribosomal_S11	Ribosomal protein S11.	GO:0030218|erythrocyte differentiation;GO:0030490|maturation of SSU-rRNA;GO:0000462|maturation of SSU-rRNA from tricistronic rRNA transcript (SSU-rRNA, 5.8S rRNA, LSU-rRNA);GO:0000122|negative regulation of transcription from RNA polymerase II promoter;GO:0000028|ribosomal small subunit assembly;GO:0006412|translation;	GO:0005737|cytoplasm;GO:0022627|cytosolic small ribosomal subunit;GO:0070062|extracellular exosome;GO:0031012|extracellular matrix;GO:0005925|focal adhesion;GO:0016020|membrane;GO:0005739|mitochondrion;GO:0005730|nucleolus;	GO:0048027|mRNA 5'-UTR binding;GO:0044822|poly(A) RNA binding;GO:0003723|RNA binding;GO:0070181|small ribosomal subunit rRNA binding;GO:0003735|structural constituent of ribosome;GO:0045182|translation regulator activity;	K02955	RP-S14e, RPS14; small subunit ribosomal protein S14e
ENSG00000224185	0.36087	-1.47045	0.0368305	down	yes	SNX18P9	processed_pseudogene	chr9:64439346-64440180:+	gi|545199695|ref|XP_005614793.1|	PREDICTED: LOW QUALITY PROTEIN: sorting nexin 18, partial [Equus caballus]	gi|149944412|ref|NG_006123.3|	Homo sapiens sorting nexin 18 pseudogene 9 (SNX18P9) on chromosome 9	Q91ZR2	186	8e-56	Sorting nexin-18	.	.	.	.	pfam10456	BAR_3_WASP_bdg	WASP-binding domain of Sorting nexin protein. The C-terminal region of the Sorting nexin group of proteins appears to carry a BAR-like (Bin/amphiphysin/Rvs) domain. This domain is very diverse and the similarities with other BAR domains are few. In the Sorting nexins it is associated with family PX, pfam00787.13, and in combination with PX appears to be necessary to bind WASP along with p85 to fo…	GO:0036089|cleavage furrow formation;GO:0006897|endocytosis;GO:0016197|endosomal transport;GO:0006886|intracellular protein transport;GO:0000281|mitotic cytokinesis;GO:0007067|mitotic nuclear division;GO:0043547|positive regulation of GTPase activity;GO:0016050|vesicle organization;	GO:0030659|cytoplasmic vesicle membrane;GO:0016023|cytoplasmic membrane-bounded vesicle;GO:0005768|endosome;GO:0010008|endosome membrane;GO:0070062|extracellular exosome;GO:0031234|extrinsic component of cytoplasmic side of plasma membrane;GO:0019898|extrinsic component of membrane;GO:0030426|growth cone;GO:0043231|intracellular membrane-bounded organelle;GO:0043025|neuronal cell body;GO:0005654|…	GO:0035091|phosphatidylinositol binding;GO:0005546|phosphatidylinositol-4,5-bisphosphate binding;	.	.
ENSG00000224316	0.616321	-0.698247	0.0140256	down	yes	GTF2IP5	unprocessed_pseudogene	chr7:65773620-65802067:+	gi|795223594|ref|XP_011850619.1|	PREDICTED: general transcription factor II-I isoform X1 [Mandrillus leucophaeus]	gi|635139324|ref|XM_008018314.1|	PREDICTED: Chlorocebus sabaeus general transcription factor IIi (GTF2I), mRNA	P78347	70.1	2e-12	General transcription factor II-I	.	.	.	.	pfam02946	GTF2I	GTF2I-like repeat. This region of sequence similarity is found up to six times in a variety of proteins including GTF2I. It has been suggested that this may be a DNA binding domain.	GO:0016525|negative regulation of angiogenesis;GO:0051481|negative regulation of cytosolic calcium ion concentration;GO:0007165|signal transduction;GO:0006366|transcription from RNA polymerase II promoter;GO:0006367|transcription initiation from RNA polymerase II promoter;GO:0014886|transition between slow and fast fiber;	GO:0042995|cell projection;GO:0005737|cytoplasm;GO:0016020|membrane;GO:0043025|neuronal cell body;GO:0005654|nucleoplasm;GO:0005634|nucleus;	GO:0003677|DNA binding;GO:0000981|RNA polymerase II transcription factor activity, sequence-specific DNA binding;GO:0003700|transcription factor activity, sequence-specific DNA binding;	K03121	TFII-I, GTF2I; transcription initiation factor TFII-I
ENSG00000224330	6.06457	2.60041	0.0391933	up	yes	AC005019.3	lincRNA	chr7:13854355-13859025:-	.	.	gi|551861164|tpe|HG500018.1|	TPA: Homo sapiens long non-coding RNA OTTHUMT00000326000.1 (AC005019.3 gene), lincRNA	.	.	.	.	.	.	.	.	pfam13491	DUF4117	Domain of unknown function (DUF4117). This family is frequently found on DNA-translocase FtsK proteins at the N-terminus. The function is not known but might well be enzymatic.	.	.	.	.	.
ENSG00000224417	0.151859	-2.7192	0.0312588	down	yes	RP11-503C24.6	sense_intronic	chr6:168298069-168302114:-	.	.	gi|551860860|tpe|HG499891.1|	TPA: Homo sapiens long non-coding RNA OTTHUMT00000043192.2 (RP11-503C24.6 gene), sense_intronic	.	.	.	.	.	.	.	.	pfam03164	Mon1	Trafficking protein Mon1. Members of this family have been called SAND proteins although these proteins do not contain a SAND domain. In Saccharomyces cerevisiae a protein complex of Mon1 and Ccz1 functions with the small GTPase Ypt7 to mediate vesicle trafficking to the vacuole. The Mon1/Ccz1 complex is conserved in eukaryotic evolution and members of this family (previously known as DUF254) are…	.	.	.	.	.
ENSG00000224655	0.475526	-1.07241	0.0313082	down	yes	AC018737.3	lincRNA	chr2:121790444-121796702:+	gi|119615670|gb|EAW95264.1|	hCG2045614 [Homo sapiens]	gi|551846848|tpe|HG494571.1|	TPA: Homo sapiens long non-coding RNA OTTHUMT00000330765.1 (AC018737.3 gene), lincRNA	.	.	.	.	.	.	.	.	pfam14225	MOR2-PAG1_C	Cell morphogenesis C-terminal. This family is the conserved C-terminal region of proteins that are involved in cell morphogenesis.	.	.	.	.	.
ENSG00000224885	0.21966	-2.18665	0.0103804	down	yes	TSSC1-IT1	sense_intronic	chr2:3298341-3301465:-	.	.	gi|551899958|tpe|HG493500.1|	TPA: Homo sapiens long non-coding RNA OTTHUMT00000322622.1 (AC073502.1 gene), sense_intronic	.	.	.	.	.	.	.	.	pfam13920	zf-C3HC4_3	Zinc finger, C3HC4 type (RING finger).	.	.	.	.	.
ENSG00000224969	0.59162	-0.757256	0.00244438	down	yes	RP11-54O7.11	antisense	chr1:1011997-1013193:-	gi|119631623|gb|EAX11218.1|	hCG2041711, partial [Homo sapiens]	gi|551894951|tpe|HG491577.1|	TPA: Homo sapiens long non-coding RNA OTTHUMT00000097998.1 (RP11-54O7.11 gene), antisense	Q9UJ41	52.8	2e-07	Rab5 GDP/GTP exchange factor	.	.	.	.	pfam13900	GVQW	Putative binding domain. This short domain is often found nested inside other longer domains. The function is not known, but the domain carries a highly conserved GVQW motif. The members are rich in proline and cysteine. This may be a binding domain.	GO:0006897|endocytosis;GO:0050728|negative regulation of inflammatory response;GO:1900165|negative regulation of interleukin-6 secretion;GO:1900235|negative regulation of Kit signaling pathway;GO:0002686|negative regulation of leukocyte migration;GO:0043305|negative regulation of mast cell degranulation;GO:0001933|negative regulation of protein phosphorylation;GO:0046580|negative regulation of Ra…	GO:0005769|early endosome;GO:0055037|recycling endosome;GO:0031982|vesicle;	GO:0003677|DNA binding;GO:0017137|Rab GTPase binding;GO:0017112|Rab guanyl-nucleotide exchange factor activity;GO:0061630|ubiquitin protein ligase activity;GO:0008270|zinc ion binding;	.	.
ENSG00000225098	0.349121	-1.5182	0.0406813	down	yes	BCRP1	unprocessed_pseudogene	chr22:24259929-24263764:-	gi|426393667|ref|XP_004063135.1|	PREDICTED: breakpoint cluster region protein-like [Gorilla gorilla gorilla]	gi|426393666|ref|XM_004063087.1|	PREDICTED: Gorilla gorilla gorilla breakpoint cluster region protein-like (LOC101132434), mRNA	P11274	267	4e-84	Breakpoint cluster region protein	.	.	.	.	pfam00620	RhoGAP	RhoGAP domain. GTPase activator proteins towards Rho/Rac/Cdc42-like small GTPases.	GO:0030036|actin cytoskeleton organization;GO:0007420|brain development;GO:0042472|inner ear morphogenesis;GO:0035556|intracellular signal transduction;GO:0060313|negative regulation of blood vessel remodeling;GO:0002692|negative regulation of cellular extravasation;GO:0050728|negative regulation of inflammatory response;GO:0043314|negative regulation of neutrophil degranulation;GO:0050885|neurom…	GO:0030054|cell junction;GO:0005829|cytosol;GO:0070062|extracellular exosome;GO:0016020|membrane;GO:0014069|postsynaptic density;GO:0045211|postsynaptic membrane;GO:0043234|protein complex;	GO:0005524|ATP binding;GO:0005096|GTPase activator activity;GO:0016301|kinase activity;GO:0004674|protein serine/threonine kinase activity;GO:0004713|protein tyrosine kinase activity;GO:0005089|Rho guanyl-nucleotide exchange factor activity;	K08878	BCR1, BCR; breakpoint cluster region protein [EC:2.7.11.1]
ENSG00000225111	8.70852	3.12243	0.0425648	up	yes	AC083900.1	sense_intronic	chr2:207868582-207869915:-	.	.	gi|551848383|tpe|HG495168.1|	TPA: Homo sapiens long non-coding RNA OTTHUMT00000337085.1 (AC083900.1 gene), sense_intronic	.	.	.	.	.	.	.	.	pfam04790	Sarcoglycan_1	Sarcoglycan complex subunit protein. The dystrophin glycoprotein complex (DGC) is a membrane-spanning complex that links the interior cytoskeleton to the extracellular matrix in muscle. The sarcoglycan complex is a subcomplex within the DGC and is composed of several muscle-specific, transmembrane proteins (alpha-, beta-, gamma-, delta- and zeta-sarcoglycan). The sarcoglycans are asparagine-linke…	.	.	.	.	.
ENSG00000225434	1.92543	0.945178	0.0484422	up	yes	LINC01504	lincRNA	chr9:72305430-72343210:+	gi|119582936|gb|EAW62532.1|	hCG2038076, partial [Homo sapiens]	gi|594191234|ref|NR_110952.1|	Homo sapiens long intergenic non-protein coding RNA 1504 (LINC01504), transcript variant 1, long non-coding RNA	Q8N9U9	53.1	7e-07	Putative uncharacterized protein SPANXA2-OT1	.	.	.	.	pfam13900	GVQW	Putative binding domain. This short domain is often found nested inside other longer domains. The function is not known, but the domain carries a highly conserved GVQW motif. The members are rich in proline and cysteine. This may be a binding domain.	.	.	.	.	.
ENSG00000226007	0.543577	-0.879444	0.0128498	down	yes	RP11-211N8.2	lincRNA	chr9:62532337-62534724:+	gi|795342935|ref|XP_011782879.1|	PREDICTED: uncharacterized protein LOC105501504 isoform X2 [Colobus angolensis palliatus]	gi|551866743|tpe|HG502065.1|	TPA: Homo sapiens long non-coding RNA OTTHUMT00000036978.2 (RP11-211N8.2 gene), lincRNA	Q5XG85	155	3e-43	Putative UPF0633 protein LOC554249	.	.	.	.	pfam06469	DUF1088	Domain of Unknown Function (DUF1088). This family is found in the neurobeachins. The function of this region is not known.	.	.	.	.	.
ENSG00000226352	0.472484	-1.08166	0.0467388	down	yes	RP11-523H24.3	antisense	chr13:19674624-19675884:+	.	.	gi|551875535|tpe|HG505442.1|	TPA: Homo sapiens long non-coding RNA OTTHUMT00000044033.2 (RP11-523H24.3 gene), antisense	.	.	.	.	.	.	.	.	pfam03313	SDH_alpha	Serine dehydratase alpha chain. L-serine dehydratase (EC:4.2.1.13) is a found as a heterodimer of alpha and beta chain or as a fusion of the two chains in a single protein. This enzyme catalyses the deamination of serine to form pyruvate. This enzyme is part of the gluconeogenesis pathway.	.	.	.	.	.
ENSG00000226393	0.572416	-0.804864	0.0397833	down	yes	IFNA20P	unprocessed_pseudogene	chr9:21321300-21321827:+	gi|742190838|ref|XP_010855390.1|	PREDICTED: interferon alpha-2-like [Bison bison bison]	gi|311082818|ref|NG_027867.1|	Homo sapiens interferon, alpha 20, pseudogene (IFNA20P) on chromosome 9	P01568	48.9	2e-14	Interferon alpha-21	.	.	.	.	pfam00143	Interferon	Interferon alpha/beta domain.	GO:0002250|adaptive immune response;GO:0030183|B cell differentiation;GO:0042100|B cell proliferation;GO:0007596|blood coagulation;GO:0019221|cytokine-mediated signaling pathway;GO:0051607|defense response to virus;GO:0006959|humoral immune response;GO:0045087|innate immune response;GO:0002323|natural killer cell activation involved in immune response;GO:0033141|positive regulation of peptidyl-se…	GO:0005576|extracellular region;GO:0005615|extracellular space;	GO:0005125|cytokine activity;GO:0005126|cytokine receptor binding;GO:0005132|type I interferon receptor binding;	K05414	IFNA; interferon alpha
ENSG00000226979	0.549854	-0.862878	0.000468983	down	yes	LTA	protein_coding	chr6:31572054-31574324:+	gi|6806893|ref|NP_000586.2|	lymphotoxin-alpha precursor [Homo sapiens]	gi|426352384|ref|XM_004043645.1|	PREDICTED: Gorilla gorilla gorilla lymphotoxin alpha (TNF superfamily, member 1), transcript variant 2 (LTA), mRNA	P01374	350	1e-117	Lymphotoxin-alpha	.	.	.	.	pfam00229	TNF	TNF(tumor Necrosis Factor) family.	GO:0006915|apoptotic process;GO:0007267|cell-cell signaling;GO:0050830|defense response to Gram-positive bacterium;GO:0006959|humoral immune response;GO:0048535|lymph node development;GO:0048147|negative regulation of fibroblast proliferation;GO:0044130|negative regulation of growth of symbiont in host;GO:0043065|positive regulation of apoptotic process;GO:0002876|positive regulation of chronic i…	GO:0005615|extracellular space;GO:0005886|plasma membrane;	GO:0005102|receptor binding;	K05468	LTA, TNFB; lymphotoxin alpha (TNF superfamily, member 1)
ENSG00000227245	9.94736	3.31431	0.0210336	up	yes	RP11-136C24.2	lincRNA	chr3:43087479-43088068:+	.	.	gi|551849580|tpe|HG495627.1|	TPA: Homo sapiens long non-coding RNA OTTHUMT00000344281.1 (RP11-136C24.2 gene), lincRNA	.	.	.	.	.	.	.	.	pfam05142	DUF702	Domain of unknown function (DUF702). Members of this family are found in various putative zinc finger proteins.	.	.	.	.	.
ENSG00000227582	0.560678	-0.834755	0.0431519	down	yes	ADGRF5P1	transcribed_processed_pseudogene	chr9:62860873-62864957:-	gi|675674916|ref|XP_008974796.1|	PREDICTED: LOW QUALITY PROTEIN: probable G-protein coupled receptor 116 [Pan paniscus]	gi|211971147|gb|AC229652.2|	Homo sapiens FOSMID clone ABC14-1145222D12 from chromosome unknown, complete sequence	Q8IZF2	223	1e-62	Adhesion G protein-coupled receptor F5	.	.	.	.	pfam01825	GPS	Latrophilin/CL-1-like GPS domain. Domain present in latrophilin/CL-1, sea urchin REJ and polycystin.	GO:0007166|cell surface receptor signaling pathway;GO:0006112|energy reserve metabolic process;GO:0045444|fat cell differentiation;GO:0007186|G-protein coupled receptor signaling pathway;GO:0042593|glucose homeostasis;GO:0043031|negative regulation of macrophage activation;GO:0071073|positive regulation of phospholipid biosynthetic process;GO:0043129|surfactant homeostasis;	GO:0045177|apical part of cell;GO:0009986|cell surface;GO:0031410|cytoplasmic vesicle;GO:0016021|integral component of membrane;GO:0005886|plasma membrane;	GO:0004930|G-protein coupled receptor activity;	K08458	GPR116; G protein-coupled receptor 116
ENSG00000227755	8.01699	3.00306	0.0373232	up	yes	AP000344.4	transcribed_processed_pseudogene	chr22:23446598-23460833:+	gi|426393788|ref|XP_004063193.1|	PREDICTED: uncharacterized protein LOC101138966 [Gorilla gorilla gorilla]	gi|426393787|ref|XM_004063145.1|	PREDICTED: Gorilla gorilla gorilla uncharacterized LOC101138966 (LOC101138966), mRNA	Q9Y6D9	77.4	6e-15	Mitotic spindle assembly checkpoint protein MAD1	.	.	.	.	pfam05557	MAD	Mitotic checkpoint protein. This family consists of several eukaryotic mitotic checkpoint (Mitotic arrest deficient or MAD) proteins. The mitotic spindle checkpoint monitors proper attachment of the bipolar spindle to the kinetochores of aligned sister chromatids and causes a cell cycle arrest in prometaphase when failures occur. Multiple components of the mitotic spindle checkpoint have been ide…	GO:0051315|attachment of mitotic spindle microtubules to kinetochore;GO:0051301|cell division;GO:0007093|mitotic cell cycle checkpoint;GO:0007094|mitotic spindle assembly checkpoint;GO:0042130|negative regulation of T cell proliferation;GO:0090235|regulation of metaphase plate congression;GO:0007062|sister chromatid cohesion;GO:0048538|thymus development;	GO:0015629|actin cytoskeleton;GO:0005813|centrosome;GO:0000777|condensed chromosome kinetochore;GO:0005737|cytoplasm;GO:0005829|cytosol;GO:0000776|kinetochore;GO:0072686|mitotic spindle;GO:0005634|nucleus;GO:0005819|spindle;GO:0000922|spindle pole;	.	K06638	MAD1L; mitotic spindle assembly checkpoint protein MAD1
ENSG00000227962	4.89121	2.29019	0.020495	up	yes	RP11-382D8.3	processed_pseudogene	chr1:235336806-235337087:+	gi|119610849|gb|EAW90443.1|	ubiquitin-conjugating enzyme E2G 1 (UBC7 homolog, yeast), isoform CRA_c [Homo sapiens]	gi|22138872|emb|AL391994.28|	Human DNA sequence from clone RP11-382D8 on chromosome 1, complete sequence	P62255	82.4	2e-19	Ubiquitin-conjugating enzyme E2 G1	.	.	.	.	pfam00179	UQ_con	Ubiquitin-conjugating enzyme. Proteins destined for proteasome-mediated degradation may be ubiquitinated. Ubiquitination follows conjugation of ubiquitin to a conserved cysteine residue of UBC homologues. TSG101 is one of several UBC homologues that lacks this active site cysteine.	GO:0070936|protein K48-linked ubiquitination;GO:0070534|protein K63-linked ubiquitination;GO:0000209|protein polyubiquitination;GO:0016567|protein ubiquitination;GO:0006511|ubiquitin-dependent protein catabolic process;	GO:0005737|cytoplasm;GO:0070062|extracellular exosome;	GO:0005524|ATP binding;GO:0061631|ubiquitin conjugating enzyme activity;GO:0061630|ubiquitin protein ligase activity;GO:0031625|ubiquitin protein ligase binding;GO:0004842|ubiquitin-protein transferase activity;	K10575	UBE2G1, UBC7; ubiquitin-conjugating enzyme E2 G1 [EC:2.3.2.23]
ENSG00000228022	2.16949	1.11735	0.0472554	up	yes	HCG20	lincRNA	chr6:30766825-30792250:+	gi|355747488|gb|EHH51985.1|	hypothetical protein EGM_12341, partial [Macaca fascicularis]	gi|551858985|tpe|HG499126.1|	TPA: Homo sapiens long non-coding RNA OTTHUMT00000076389.2 (HCG20 gene), lincRNA	Q8N2A0	94.4	2e-21	Putative uncharacterized protein encoded by LINC00269	.	.	.	.	pfam13900	GVQW	Putative binding domain. This short domain is often found nested inside other longer domains. The function is not known, but the domain carries a highly conserved GVQW motif. The members are rich in proline and cysteine. This may be a binding domain.	.	.	.	.	.
ENSG00000228293	0.318456	-1.65083	0.0361577	down	yes	RP4-686C3.7	antisense	chr20:2664352-2665874:+	gi|119590843|gb|EAW70437.1|	hCG1641896, isoform CRA_b [Homo sapiens]	gi|551890316|tpe|HG511137.1|	TPA: Homo sapiens long non-coding RNA OTTHUMT00000077588.1 (RP4-686C3.7 gene), antisense	Q8NHA8	55.5	2e-07	Olfactory receptor 1F12	.	.	.	.	pfam13900	GVQW	Putative binding domain. This short domain is often found nested inside other longer domains. The function is not known, but the domain carries a highly conserved GVQW motif. The members are rich in proline and cysteine. This may be a binding domain.	GO:0007186|G-protein coupled receptor signaling pathway;	GO:0016021|integral component of membrane;GO:0005886|plasma membrane;	GO:0004930|G-protein coupled receptor activity;GO:0004984|olfactory receptor activity;	.	.
ENSG00000228323	4.25683	2.08978	0.048499	up	yes	AC008753.6	antisense	chr19:53854581-53869107:-	gi|355562626|gb|EHH19220.1|	hypothetical protein EGK_19893, partial [Macaca mulatta]	gi|551889981|tpe|HG511010.1|	TPA: Homo sapiens long non-coding RNA OTTHUMT00000134347.2 (AC008753.6 gene), antisense	Q6NY19	52.4	3e-07	KN motif and ankyrin repeat domain-containing protein 3	.	.	.	.	pfam13900	GVQW	Putative binding domain. This short domain is often found nested inside other longer domains. The function is not known, but the domain carries a highly conserved GVQW motif. The members are rich in proline and cysteine. This may be a binding domain.	.	.	.	.	.
ENSG00000228360	0.294519	-1.76357	0.00872866	down	yes	RP11-365F18.1	processed_pseudogene	chr7:139227537-139227828:-	gi|795299024|ref|XP_011815604.1|	PREDICTED: putative 60S ribosomal protein L37a [Colobus angolensis palliatus]	gi|426214120|ref|NG_010341.2|	Homo sapiens ribosomal protein L37a pseudogene 5 (RPL37AP5) on chromosome 7	P61515	84.3	8e-21	Putative 60S ribosomal protein L37a	YPR043w	53.5	1e-09	COG1997	pfam01780	Ribosomal_L37ae	Ribosomal L37ae protein family. This ribosomal protein is found in archaebacteria and eukaryotes. It contains four conserved cysteine residues that may bind to zinc.	GO:0006412|translation;	GO:0005840|ribosome;	GO:0046872|metal ion binding;GO:0003735|structural constituent of ribosome;	.	.
ENSG00000228492	0.395902	-1.33678	0.018809	down	yes	RAB11FIP1P1	processed_pseudogene	chrX:74202834-74204595:+	gi|507668811|ref|XP_004637316.1|	PREDICTED: rab11 family-interacting protein 1 isoform X2 [Octodon degus]	gi|157954539|ref|NG_007008.1|	Homo sapiens RAB11 family interacting protein 1 (class I) pseudogene 1 (RAB11FIP1P1) on chromosome X	Q6WKZ4	90.5	3e-22	Rab11 family-interacting protein 1	.	.	.	.	pfam13914	Phostensin	Phostensin PP1-binding and SH3-binding region. Phostensin has been identified as a PP1 regulatory protein binding PP1 at the KISF motif. The domain also appears to carry an incomplete incomplete SH3-binding domain PxRxP further upstream. It is likely that Phostensin targets PP1 to the F-actin cytoskeleton. Phostensin binds to actin and decreases the elongation and depolymerization rates of actin …	GO:0070164|negative regulation of adiponectin secretion;GO:0015031|protein transport;GO:0045055|regulated secretory pathway;	GO:0005737|cytoplasm;GO:0043231|intracellular membrane-bounded organelle;GO:0030670|phagocytic vesicle membrane;GO:0055037|recycling endosome;	GO:0017137|Rab GTPase binding;	K12484	RAB11FIP1_2_5; Rab11 family-interacting protein 1/2/5
ENSG00000228539	0.0913228	-3.45288	0.00826456	down	yes	RP11-526K17.2	antisense	chr20:24491472-24502345:-	.	.	gi|551890640|tpe|HG511275.1|	TPA: Homo sapiens long non-coding RNA OTTHUMT00000078373.1 (RP11-526K17.2 gene), antisense	.	.	.	.	.	.	.	.	pfam12803	G-7-MTase	mRNA (guanine-7-)methyltransferase (G-7-MTase). The Sendai virus RNA-dependent RNA polymerase complex, which consists of L and P proteins, participates in the synthesis of viral mRNAs that possess a methylated cap structure. The N-terminal of the L protein acts as the RNA-dependent RNA polymerase part of the molecule, family Paramyx_RNA_pol, pfam00946. This domain is the C-terminal part of the L …	.	.	.	.	.
ENSG00000228817	5.23959	2.38945	0.0237239	up	yes	BACH1-IT2	lincRNA	chr21:29370497-29373709:+	.	.	gi|551891665|tpe|HG511710.1|	TPA: Homo sapiens long non-coding RNA OTTHUMT00000171987.3 (AP000240.6 gene), lincRNA	.	.	.	.	.	.	.	.	pfam10395	Utp8	Utp8 family. Utp8 is an essential component of the nuclear tRNA export machinery in Saccharomyces cerevisiae. It is a tRNA binding protein that acts at a step between tRNA maturation /aminoacylation, and translocation of the tRNA across the nuclear pore complex.	.	.	.	.	.
ENSG00000229089	0.645188	-0.632208	0.0144092	down	yes	ANKRD20A8P	transcribed_unprocessed_pseudogene	chr2:94811046-94857282:-	gi|182627628|sp|Q5CZ79.2|AN20B_HUMAN	RecName: Full=Ankyrin repeat domain-containing protein 20B; AltName: Full=Ankyrin repeat domain-containing protein 20A pseudogene	gi|60219552|emb|CR936649.1|	Homo sapiens mRNA; cDNA DKFZp686H1631 (from clone DKFZp686H1631)	Q5CZ79	1025	0	Ankyrin repeat domain-containing protein 20B	all2748	87.4	4e-17	COG0666	pfam14915	CCDC144C	CCDC144C protein coiled-coil region. This family includes the human protein CCDC144C and the ankyrin repeat domain-containing protein 26-like 1 found in eukaryotes. Its function remains unknown, however, it is known to contain a coiled-coil domain which corresponds to this region. The ankyrin repeat which features in this protein is a common amino acid motif.	.	.	.	.	.
ENSG00000229635	0.342034	-1.54779	0.0261306	down	yes	RP4-713B5.2	processed_pseudogene	chr1:93384487-93384998:-	gi|528491926|ref|XP_005155351.1|	PREDICTED: F-box and WD repeat domain containing 11b isoform X1 [Danio rerio]	gi|302486225|ref|NG_026960.1|	Homo sapiens F-box and WD repeat domain containing 11 pseudogene (LOC100421273) on chromosome 1	Q9UKB1	149	6e-41	F-box/WD repeat-containing protein 11	.	.	.	.	pfam12125	Beta-TrCP_D	D domain of beta-TrCP. This domain is found in eukaryotes, and is approximately 40 amino acids in length. It is found associated with pfam00646, pfam00400. The protein that contains this domain functions as a ubiquitin ligase. Ubiquitination is required to direct proteins towards the proteasome for degradation. This protein is part of the WD40 class of F box proteins. The D domain of these F box …	GO:0038095|Fc-epsilon receptor signaling pathway;GO:0000086|G2/M transition of mitotic cell cycle;GO:0042347|negative regulation of NF-kappaB import into nucleus;GO:0045892|negative regulation of transcription, DNA-templated;GO:0038061|NIK/NF-kappaB signaling;GO:0042753|positive regulation of circadian rhythm;GO:0045862|positive regulation of proteolysis;GO:0045893|positive regulation of transcri…	GO:0005813|centrosome;GO:0005829|cytosol;GO:0005634|nucleus;GO:0019005|SCF ubiquitin ligase complex;GO:0000151|ubiquitin ligase complex;	GO:0061630|ubiquitin protein ligase activity;GO:0004842|ubiquitin-protein transferase activity;	K03362	FBXW1_11, BTRC, beta-TRCP; F-box and WD-40 domain protein 1/11
ENSG00000229893	0.102926	-3.28032	0.00792769	down	yes	AC004549.6	antisense	chr7:27733064-27740395:-	gi|426355786|ref|XP_004045288.1|	PREDICTED: uncharacterized protein LOC101130771 [Gorilla gorilla gorilla]	gi|551861484|tpe|HG500141.1|	TPA: Homo sapiens long non-coding RNA OTTHUMT00000327509.1 (AC004549.6 gene), antisense	.	.	.	.	.	.	.	.	pfam03251	Tymo_45kd_70kd	Tymovirus 45/70Kd protein. Tymoviruses are single stranded RNA viruses. This family includes a protein of unknown function that has been named based on its molecular weight. Tymoviruses such as the ononis yellow mosaic tymovirus encode only three proteins. Of these two are overlapping this protein overlaps a larger ORF that is thought to be the polymerase.	.	.	.	.	.
ENSG00000230021	0.423721	-1.23881	0.0453972	down	yes	RP5-857K21.4	lincRNA	chr1:585989-827796:-	gi|768042075|ref|XP_011544574.1|	PREDICTED: uncharacterized protein LOC105379561 isoform X4 [Homo sapiens]	gi|551894813|tpe|HG491529.1|	TPA: Homo sapiens long non-coding RNA OTTHUMT00000006453.1 (RP5-857K21.1 gene), lincRNA	Q6ZU15	61.2	3e-10	Septin-14	.	.	.	.	pfam13900	GVQW	Putative binding domain. This short domain is often found nested inside other longer domains. The function is not known, but the domain carries a highly conserved GVQW motif. The members are rich in proline and cysteine. This may be a binding domain.	GO:0006355|regulation of transcription, DNA-templated;GO:0006351|transcription, DNA-templated;	GO:0005634|nucleus;	GO:0003677|DNA binding;GO:0046872|metal ion binding;	K16941	SEPT14; septin 14
ENSG00000230113	0.0918039	-3.4453	0.0420819	down	yes	AC091177.1	antisense	chr17:30956280-30956961:-	gi|694967679|ref|XP_009430727.1|	PREDICTED: arf-GAP with dual PH domain-containing protein 2 isoform X7 [Pan troglodytes]	gi|551884801|tpe|HG508911.1|	TPA: Homo sapiens long non-coding RNA OTTHUMT00000256216.1 (AC091177.1 gene), antisense	Q9NPF8	134	6e-36	Arf-GAP with dual PH domain-containing protein 2	.	.	.	.	pfam00169	PH	PH domain. PH stands for pleckstrin homology.	GO:0007507|heart development;	GO:0005737|cytoplasm;GO:0005740|mitochondrial envelope;GO:0005886|plasma membrane;	GO:0005096|GTPase activator activity;GO:0043533|inositol 1,3,4,5 tetrakisphosphate binding;GO:0046872|metal ion binding;GO:0005547|phosphatidylinositol-3,4,5-trisphosphate binding;GO:0043325|phosphatidylinositol-3,4-bisphosphate binding;GO:0005546|phosphatidylinositol-4,5-bisphosphate binding;GO:0030674|protein binding, bridging;	.	.
ENSG00000230131	0.639122	-0.645837	0.0365771	down	yes	RP11-282I1.1	lincRNA	chr10:123356450-123517708:+	.	.	gi|551870296|tpe|HG503321.1|	TPA: Homo sapiens long non-coding RNA OTTHUMT00000050847.1 (RP11-282I1.1 gene), lincRNA	.	.	.	.	.	.	.	.	pfam14106	DUF4279	Domain of unknown function (DUF4279). This family of proteins is functionally uncharacterized. This family of proteins is found in bacteria. Proteins in this family are typically between 134 and 145 amino acids in length.	.	.	.	.	.
ENSG00000230183	1.70541	0.770118	0.04135	up	yes	CNOT6LP1	processed_pseudogene	chr15:56005715-56007176:-	gi|532103448|ref|XP_005337325.1|	PREDICTED: CCR4-NOT transcription complex subunit 6-like isoform X1 [Ictidomys tridecemlineatus]	gi|222144339|ref|NG_009481.1|	Homo sapiens CCR4-NOT transcription complex, subunit 6-like pseudogene 1 (CNOT6LP1) on chromosome 15	Q96LI5	868	0	CCR4-NOT transcription complex subunit 6-like	SPCC31H12.08c_2	262	1e-81	COG5239	pfam03372	Exo_endo_phos	Endonuclease/Exonuclease/phosphatase family. This large family of proteins includes magnesium dependent endonucleases and a large number of phosphatases involved in intracellular signalling. This family includes: AP endonuclease proteins EC:4.2.99.18, DNase I proteins EC:3.1.21.1, Synaptojanin an inositol-1,4,5-trisphosphate phosphatase EC:3.1.3.56, Sphingomyelinase EC:3.1.4.12 and Nocturnin.	GO:0006977|DNA damage response, signal transduction by p53 class mediator resulting in cell cycle arrest;GO:0031047|gene silencing by RNA;GO:0061157|mRNA destabilization;GO:0006397|mRNA processing;GO:0000289|nuclear-transcribed mRNA poly(A) tail shortening;GO:0008284|positive regulation of cell proliferation;GO:0010606|positive regulation of cytoplasmic mRNA processing body assembly;GO:0006355|re…	GO:0030014|CCR4-NOT complex;GO:0005737|cytoplasm;GO:0005829|cytosol;GO:0005634|nucleus;	GO:0046872|metal ion binding;GO:0004535|poly(A)-specific ribonuclease activity;	K12603	CNOT6, CCR4; CCR4-NOT transcription complex subunit 6 [EC:3.1.13.4]
ENSG00000230409	1.57925	0.659244	0.00173245	up	yes	TCEA1P2	processed_pseudogene	chr3:37275693-37276598:+	gi|313223|emb|CAA51940.1|	transcription elongation factor [Homo sapiens]	gi|575010726|ref|NG_003186.4|	Homo sapiens transcription elongation factor A (SII), 1 pseudogene 2 (TCEA1P2) on chromosome 3	P23193	614	0	Transcription elongation factor A protein 1	SPAC20H4.03c	152	2e-42	COG1594	pfam07500	TFIIS_M	Transcription factor S-II (TFIIS), central domain. Transcription elongation by RNA polymerase II is regulated by the general elongation factor TFIIS. This factor stimulates RNA polymerase II to transcribe through regions of DNA that promote the formation of stalled ternary complexes. TFIIS is composed of three structural domains, termed I, II, and III. The two C-terminal domains (II and III), thi…	GO:0032784|regulation of DNA-templated transcription, elongation;GO:0006357|regulation of transcription from RNA polymerase II promoter;GO:0006368|transcription elongation from RNA polymerase II promoter;GO:0006366|transcription from RNA polymerase II promoter;GO:0006283|transcription-coupled nucleotide-excision repair;	GO:0005730|nucleolus;GO:0005654|nucleoplasm;GO:0005634|nucleus;	GO:0003677|DNA binding;GO:0008270|zinc ion binding;	K03145	TFIIS; transcription elongation factor S-II
ENSG00000230433	7.98164	2.99669	0.034974	up	yes	RP1-20B11.2	antisense	chr6:524171-525581:+	.	.	gi|551858389|tpe|HG498882.1|	TPA: Homo sapiens long non-coding RNA OTTHUMT00000039623.1 (RP1-20B11.2 gene), antisense	.	.	.	.	.	.	.	.	pfam11765	Hyphal_reg_CWP	Hyphally regulated cell wall protein N-terminal. The proteins in this family are all fungal and largely annotated as being hyphally regulated cell wall proteins, and several are listed as the enzyme EC:3.2.1.18. This enzyme is acetylneuraminyl hydrolase or exo-alpha-sialidase, that hydrolyses glycosidic linkages of terminal sialic acid residues in oligosaccharides, glycoproteins, glycolipids, col…	.	.	.	.	.
ENSG00000230498	0.246397	-2.02094	0.0358501	down	yes	RP4-564M11.2	antisense	chr1:77067920-77078482:+	.	.	gi|551896738|tpe|HG492193.1|	TPA: Homo sapiens long non-coding RNA OTTHUMT00000026695.1 (RP4-564M11.2 gene), antisense	.	.	.	.	.	.	.	.	pfam02267	Rib_hydrolayse	ADP-ribosyl cyclase. ADP-ribosyl cyclase EC:3.2.2.5 (also know as cyclic ADP-ribose hydrolase or CD38) synthesizes cyclic-ADP ribose, a second messenger for glucose-induced insulin secretion.	.	.	.	.	.
ENSG00000230729	0.149201	-2.74467	0.0387384	down	yes	RP11-296L22.8	antisense	chr9:34521527-34524241:+	gi|119578854|gb|EAW58450.1|	hCG2041306, partial [Homo sapiens]	gi|551866269|tpe|HG501979.1|	TPA: Homo sapiens long non-coding RNA OTTHUMT00000001106.1 (RP11-296L22.8 gene), antisense	Q8K1D8	53.9	1e-08	Adropin	.	.	.	.	pfam03154	Atrophin-1	Atrophin-1 family. Atrophin-1 is the protein product of the dentatorubral-pallidoluysian atrophy (DRPLA) gene. DRPLA OMIM:125370 is a progressive neurodegenerative disorder. It is caused by the expansion of a CAG repeat in the DRPLA gene on chromosome 12p. This results in an extended polyglutamine region in atrophin-1, that is thought to confer toxicity to the protein, possibly through altering i…	.	GO:0005576|extracellular region;	.	.	.
ENSG00000230804	0.267152	-1.90427	0.043007	down	yes	C2orf27AP3	unprocessed_pseudogene	chr9:40121962-40122540:+	gi|675674730|ref|XP_008969645.1|	PREDICTED: LOW QUALITY PROTEIN: uncharacterized protein C2orf27-like, partial [Pan paniscus]	gi|625180327|ref|NG_023900.2|	Homo sapiens chromosome 2 open reading frame 27A pseudogene 3 (C2orf27AP3) on chromosome 9	Q580R0	111	5e-58	Uncharacterized protein C2orf27	.	.	.	.	pfam01413	C4	C-terminal tandem repeated domain in type 4 procollagen. Duplicated domain in C-terminus of type 4 collagens. Mutations in alpha-5 collagen IV are associated with X-linked Alport syndrome.	.	.	.	.	.
ENSG00000230911	0.246122	-2.02256	0.0313383	down	yes	PPIHP1	processed_pseudogene	chr11:112029858-112030367:-	gi|5454154|ref|NP_006338.1|	peptidyl-prolyl cis-trans isomerase H [Homo sapiens]	gi|426214173|ref|NG_001586.5|	Homo sapiens peptidylprolyl isomerase H (cyclophilin H) pseudogene 1 (PPIHP1) on chromosome 11	O43447	299	1e-102	Peptidyl-prolyl cis-trans isomerase H	SPBC1709.04c	179	6e-56	COG0652	pfam00160	Pro_isomerase	Cyclophilin type peptidyl-prolyl cis-trans isomerase/CLD. The peptidyl-prolyl cis-trans isomerases, also known as cyclophilins, share this domain of about 109 amino acids. Cyclophilins have been found in all organisms studied so far and catalyse peptidyl-prolyl isomerization during which the peptide bond preceding proline (the peptidyl-prolyl bond) is stabilized in the cis conformation. Mammalian…	GO:0000398|mRNA splicing, via spliceosome;GO:0045070|positive regulation of viral genome replication;GO:0006461|protein complex assembly;GO:0006457|protein folding;	GO:0005737|cytoplasm;GO:0016607|nuclear speck;GO:0005654|nucleoplasm;GO:0005681|spliceosomal complex;GO:0071001|U4/U6 snRNP;GO:0046540|U4/U6 x U5 tri-snRNP complex;	GO:0016018|cyclosporin A binding;GO:0003755|peptidyl-prolyl cis-trans isomerase activity;GO:0043021|ribonucleoprotein complex binding;	K09567	PPIH, CYPH; peptidyl-prolyl isomerase H (cyclophilin H) [EC:5.2.1.8]
ENSG00000231057	0.552759	-0.855277	0.0476286	down	yes	RP11-122M14.1	antisense	chr1:211675762-211690103:+	gi|119613815|gb|EAW93409.1|	hCG2039073, partial [Homo sapiens]	gi|551899148|tpe|HG493161.1|	TPA: Homo sapiens long non-coding RNA OTTHUMT00000090161.1 (RP11-122M14.1 gene), antisense	K7EIQ3	46.6	3e-06	Uncharacterized protein ZNF561-AS1	.	.	.	.	pfam13900	GVQW	Putative binding domain. This short domain is often found nested inside other longer domains. The function is not known, but the domain carries a highly conserved GVQW motif. The members are rich in proline and cysteine. This may be a binding domain.	.	GO:0005829|cytosol;GO:0070062|extracellular exosome;GO:0016020|membrane;	GO:0042803|protein homodimerization activity;	.	.
ENSG00000231162	0.526632	-0.925134	0.0078681	down	yes	COX11P1	processed_pseudogene	chr6:28446973-28447807:+	gi|426347443|ref|XP_004041359.1|	PREDICTED: cytochrome c oxidase assembly protein COX11, mitochondrial-like isoform 1 [Gorilla gorilla gorilla]	gi|4156137|gb|AC005678.1|AC005678	Homo sapiens PAC clone RP11-569I24 from 7, complete sequence	Q9Y6N1	136	2e-130	Cytochrome c oxidase assembly protein COX11, mitochondrial	SPAC1420.04c_2	200	2e-62	COG3175	pfam04442	CtaG_Cox11	Cytochrome c oxidase assembly protein CtaG/Cox11. Cytochrome c oxidase assembly protein is essential for the assembly of functional cytochrome oxidase protein. In eukaryotes it is an integral protein of the mitochondrial inner membrane. Cox11 is essential for the insertion of Cu(I) ions to form the CuB site. This is essential for the stability of other structures in subunit I, for example haems a…	GO:0009060|aerobic respiration;GO:0033132|negative regulation of glucokinase activity;GO:0008535|respiratory chain complex IV assembly;GO:0007585|respiratory gaseous exchange;	GO:0016021|integral component of membrane;GO:0005743|mitochondrial inner membrane;GO:0005739|mitochondrion;	GO:0005507|copper ion binding;GO:0004129|cytochrome-c oxidase activity;GO:0009055|electron carrier activity;	K02258	COX11; cytochrome c oxidase assembly protein subunit 11
ENSG00000231196	0.29128	-1.77952	0.0186941	down	yes	RP11-495P10.7	processed_transcript	chr1:148290889-148297271:-	gi|694887827|ref|XP_009425944.1|	PREDICTED: LOW QUALITY PROTEIN: putative uncharacterized protein FLJ35883 [Pan troglodytes]	gi|551898060|tpe|HG492701.1|	TPA: Homo sapiens long non-coding RNA OTTHUMT00000039545.1 (RP11-495P10.7 gene), lincRNA	.	.	.	.	.	.	.	.	pfam01409	tRNA-synt_2d	tRNA synthetases class II core domain (F). Other tRNA synthetase sub-families are too dissimilar to be included. This family includes only phenylalanyl-tRNA synthetases. This is the core catalytic domain.	.	.	.	.	.
ENSG00000231605	0.188913	-2.40421	0.0148508	down	yes	LINC01363	antisense	chr1:167175917-167195792:-	gi|119611191|gb|EAW90785.1|	hCG1658700 [Homo sapiens]	gi|551898520|tpe|HG492890.1|	TPA: Homo sapiens long non-coding RNA OTTHUMT00000083235.1 (RP11-277B15.2 gene), antisense	.	.	.	.	.	.	.	.	pfam07823	CPDase	Cyclic phosphodiesterase-like protein. Cyclic phosphodiesterase (CPDase) is involved in the tRNA splicing pathway. This protein exhibits a bilobal arrangement of two alpha-beta modules. Two antiparallel helices are found on the outer side of each lobe and frame an antiparallel beta-sheet that is wrapped around an accessible cleft. Moreover, the beta-strands of each lobe interact with the other lo…	.	.	.	.	.
ENSG00000232046	0.308262	-1.69777	0.032022	down	yes	AC007392.3	lincRNA	chr2:66574030-66730157:+	gi|149044735|gb|EDL97921.1|	rCG23237 [Rattus norvegicus]	gi|571330822|ref|NR_110156.1|	Homo sapiens uncharacterized LOC100507073 (LOC100507073), long non-coding RNA	.	.	.	.	.	.	.	.	pfam13900	GVQW	Putative binding domain. This short domain is often found nested inside other longer domains. The function is not known, but the domain carries a highly conserved GVQW motif. The members are rich in proline and cysteine. This may be a binding domain.	.	.	.	.	.
ENSG00000232518	0.266775	-1.9063	0.0427751	down	yes	AC074366.3	antisense	chr2:38668202-38671421:-	gi|355693348|gb|EHH27951.1|	hypothetical protein EGK_18274, partial [Macaca mulatta]	gi|15277359|gb|AC074366.6|	Homo sapiens BAC clone RP11-255N19 from 2, complete sequence	.	.	.	.	.	.	.	.	pfam13900	GVQW	Putative binding domain. This short domain is often found nested inside other longer domains. The function is not known, but the domain carries a highly conserved GVQW motif. The members are rich in proline and cysteine. This may be a binding domain.	.	.	.	.	.
ENSG00000232818	0.46683	-1.09903	0.0240022	down	yes	RPS2P32	processed_pseudogene	chr7:23490473-23491364:+	gi|48734721|gb|AAH71673.1|	Ribosomal protein S2 [Homo sapiens]	gi|221307604|ref|NR_026676.1|	Homo sapiens ribosomal protein S2 pseudogene 32 (RPS2P32), non-coding RNA	P15880	203	1e-108	40S ribosomal protein S2	SPCC576.08c	149	1e-61	COG0098	pfam03719	Ribosomal_S5_C	Ribosomal protein S5, C-terminal domain.	GO:0000184|nuclear-transcribed mRNA catabolic process, nonsense-mediated decay;GO:0051347|positive regulation of transferase activity;GO:0006364|rRNA processing;GO:0006614|SRP-dependent cotranslational protein targeting to membrane;GO:0006412|translation;GO:0006413|translational initiation;GO:0019083|viral transcription;	GO:0005913|cell-cell adherens junction;GO:0005737|cytoplasm;GO:0005829|cytosol;GO:0022627|cytosolic small ribosomal subunit;GO:0070062|extracellular exosome;GO:0005925|focal adhesion;GO:0016020|membrane;GO:0005654|nucleoplasm;GO:0005634|nucleus;	GO:0098641|cadherin binding involved in cell-cell adhesion;GO:0019899|enzyme binding;GO:0017134|fibroblast growth factor binding;GO:0003729|mRNA binding;GO:0044822|poly(A) RNA binding;GO:0003735|structural constituent of ribosome;	K02981	RP-S2e, RPS2; small subunit ribosomal protein S2e
ENSG00000232835	5.39283	2.43104	0.039818	up	yes	AC107057.1	lincRNA	chr2:5549780-5556031:-	.	.	gi|551900023|tpe|HG493529.1|	TPA: Homo sapiens long non-coding RNA OTTHUMT00000322559.1 (AC107057.1 gene), lincRNA	.	.	.	.	.	.	.	.	pfam05208	ALG3	ALG3 protein. The formation of N-glycosidic linkages of glycoproteins involves the ordered assembly of the common Glc3Man9GlcNAc2 core-oligosaccharide on the lipid carrier dolichyl pyrophosphate. Whereas early mannosylation steps occur on the cytoplasmic side of the endoplasmic reticulum with GDP-Man as donor, the final reactions from Man5GlcNAc2-PP-Dol to Man9GlcNAc2-PP-Dol on the lumenal side u…	.	.	.	.	.
ENSG00000233030	0.491329	-1.02524	4.97529e-05	down	yes	RP11-196G18.3	antisense	chr1:149785659-149793020:-	gi|530365833|ref|XP_005245759.1|	PREDICTED: uncharacterized protein LOC101927767 [Homo sapiens]	gi|551898154|tpe|HG492740.1|	TPA: Homo sapiens long non-coding RNA OTTHUMT00000033450.1 (RP11-196G18.3 gene), antisense	.	.	.	.	.	.	.	.	pfam01151	ELO	GNS1/SUR4 family. Members of this family are involved in long chain fatty acid elongation systems that produce the 26-carbon precursors for ceramide and sphingolipid synthesis. Predicted to be integral membrane proteins, in eukaryotes they are probably located on the endoplasmic reticulum. Yeast ELO3 affects plasma membrane H+-ATPase activity, and may act on a glucose-signaling pathway that contr…	.	.	.	.	.
ENSG00000233155	1.50863	0.593235	0.0495127	up	yes	HMGA1P8	processed_pseudogene	chr2:74418122-74418442:-	gi|119624169|gb|EAX03764.1|	high mobility group AT-hook 1, isoform CRA_c, partial [Homo sapiens]	gi|390979653|ref|NG_032791.1|	Homo sapiens high mobility group AT-hook 1 pseudogene 8 (functional) (HMGA1P8) on chromosome 2	.	.	.	.	.	.	.	.	pfam15446	zf-PHD-like	PHD/FYVE-zinc-finger like domain. This family appears to be a combination domain of several consecutive zinc-binding regions.	.	.	.	.	.
ENSG00000233297	0.637769	-0.648894	0.0395508	down	yes	RASA4DP	unprocessed_pseudogene	chr7:102681836-102690469:-	gi|299829175|ref|NP_001073346.2|	ras GTPase-activating protein 4 isoform 2 [Homo sapiens]	gi|299829174|ref|NM_001079877.2|	Homo sapiens RAS p21 protein activator 4 (RASA4), transcript variant 2, mRNA	O43374	763	0	Ras GTPase-activating protein 4	.	.	.	.	pfam00616	RasGAP	GTPase-activator protein for Ras-like GTPase. All alpha-helical domain that accelerates the GTPase activity of Ras, thereby "switching" it into an "off" position.	GO:0071277|cellular response to calcium ion;GO:0000165|MAPK cascade;GO:0034260|negative regulation of GTPase activity;GO:0046580|negative regulation of Ras protein signal transduction;	GO:0005829|cytosol;GO:0031235|intrinsic component of the cytoplasmic side of the plasma membrane;	GO:0005096|GTPase activator activity;GO:0046872|metal ion binding;	K17630	RASA4, CAPRI; Ras GTPase-activating protein 4
ENSG00000233588	1.72396	0.785725	0.0164398	up	yes	CYP51A1P2	processed_pseudogene	chr13:28722386-28724021:-	gi|795325267|ref|XP_011818622.1|	PREDICTED: lanosterol 14-alpha demethylase isoform X1 [Colobus angolensis palliatus]	gi|594111157|ref|XM_006078347.1|	PREDICTED: Bubalus bubalis lanosterol 14-alpha demethylase-like (LOC102410939), mRNA	Q5RE72	755	0	Lanosterol 14-alpha demethylase	SPAC13A11.02c	257	6e-78	COG2124	pfam00067	p450	Cytochrome P450. Cytochrome P450s are haem-thiolate proteins involved in the oxidative degradation of various compounds. They are particularly well known for their role in the degradation of environmental toxins and mutagens. They can be divided into 4 classes, according to the method by which electrons from NAD(P)H are delivered to the catalytic site. Sequence conservation is relatively low with…	GO:0006695|cholesterol biosynthetic process;	GO:0005789|endoplasmic reticulum membrane;GO:0016021|integral component of membrane;GO:0031090|organelle membrane;	GO:0020037|heme binding;GO:0005506|iron ion binding;GO:0008398|sterol 14-demethylase activity;	K05917	CYP51; sterol 14-demethylase [EC:1.14.13.70]
ENSG00000233589	0.597516	-0.742951	0.0386496	down	yes	RP4-694A7.2	antisense	chr1:68479129-68483539:+	gi|7020615|dbj|BAA91201.1|	unnamed protein product [Homo sapiens]	gi|551896589|tpe|HG492151.1|	TPA: Homo sapiens long non-coding RNA OTTHUMT00000025505.1 (RP4-694A7.2 gene), antisense	Q5TB30	100	7e-22	DEP domain-containing protein 1A	.	.	.	.	pfam09815	XK-related	XK-related protein. Members of this family comprise various XK-related proteins, that are involved in sodium-dependent transport of neutral amino acids or oligopeptides. These proteins are responsible for the Kx blood group system - defects results in McLeod syndrome, an X-linked multi-system disorder characterized by late onset abnormalities in the neuromuscular and hematopoietic systems.	GO:0035556|intracellular signal transduction;GO:0045892|negative regulation of transcription, DNA-templated;GO:0006351|transcription, DNA-templated;	GO:0005654|nucleoplasm;GO:0005634|nucleus;GO:0017053|transcriptional repressor complex;	GO:0005096|GTPase activator activity;	.	.
ENSG00000233622	0.615507	-0.700154	0.0354489	down	yes	CYP2T1P	unitary_pseudogene	chr19:40808525-40811390:-	gi|795073242|ref|XP_011839602.1|	PREDICTED: LOW QUALITY PROTEIN: cytochrome P450 2F2-like [Mandrillus leucophaeus]	gi|426388806|ref|XR_176865.1|	PREDICTED: Gorilla gorilla gorilla cytochrome P450 2F2-like (LOC101150224), misc_RNA	P24903	172	4e-80	Cytochrome P450 2F1	.	.	.	.	pfam00067	p450	Cytochrome P450. Cytochrome P450s are haem-thiolate proteins involved in the oxidative degradation of various compounds. They are particularly well known for their role in the degradation of environmental toxins and mutagens. They can be divided into 4 classes, according to the method by which electrons from NAD(P)H are delivered to the catalytic site. Sequence conservation is relatively low with…	GO:0019373|epoxygenase P450 pathway;GO:0018931|naphthalene metabolic process;GO:0009636|response to toxic substance;GO:0018979|trichloroethylene metabolic process;GO:0006805|xenobiotic metabolic process;	GO:0005789|endoplasmic reticulum membrane;GO:0043231|intracellular membrane-bounded organelle;GO:0031090|organelle membrane;	GO:0008392|arachidonic acid epoxygenase activity;GO:0070330|aromatase activity;GO:0020037|heme binding;GO:0005506|iron ion binding;GO:0004497|monooxygenase activity;GO:0016712|oxidoreductase activity, acting on paired donors, with incorporation or reduction of molecular oxygen, reduced flavin or flavoprotein as one donor, and incorporation of one atom of oxygen;GO:0019825|oxygen binding;GO:000839…	K07416	CYP2F; cytochrome P450, family 2, subfamily F [EC:1.14.14.1]
ENSG00000233926	4.6212	2.20827	0.0328923	up	yes	RP11-154D17.1	lincRNA	chr9:81689713-81776900:+	gi|594096877|ref|XP_006071691.1|	PREDICTED: uncharacterized protein DKFZp434B061-like [Bubalus bubalis]	gi|564473428|ref|NR_109772.1|	Homo sapiens uncharacterized LOC101927502 (LOC101927502), long non-coding RNA	.	.	.	.	.	.	.	.	pfam05212	DUF707	Protein of unknown function (DUF707). This family consists of several uncharacterized proteins from Arabidopsis thaliana.	.	.	.	.	.
ENSG00000233930	0.491712	-1.02412	3.69697e-07	down	yes	KRTAP5-AS1	antisense	chr11:1571353-1599184:+	gi|16549806|dbj|BAB70862.1|	unnamed protein product [Homo sapiens]	gi|551870466|tpe|HG503433.1|	TPA: Homo sapiens long non-coding RNA OTTHUMT00000384772.1 (RP13-25N22.1 gene), antisense	.	.	.	.	.	.	.	.	pfam09421	FRQ	Frequency clock protein. The frequency clock protein, is the central component of the frq-based circadian negative feedback loop, regulates various aspects of the circadian clock in Neurospora crassa. This protein has been shown to interact with itself via a coiled-coil.	.	.	.	.	.
ENSG00000234005	0.428658	-1.2221	0.0425058	down	yes	GAPDHP22	processed_pseudogene	chr13:99190579-99190991:-	gi|297274736|ref|XP_001091567.2|	PREDICTED: glyceraldehyde-3-phosphate dehydrogenase [Macaca mulatta]	gi|224500866|ref|NG_011332.1|	Homo sapiens glyceraldehyde 3 phosphate dehydrogenase pseudogene 22 (GAPDHP22) on chromosome 13	Q5RAB4	186	5e-57	Glyceraldehyde-3-phosphate dehydrogenase	SPBC354.12	122	4e-33	COG0057	pfam00044	Gp_dh_N	Glyceraldehyde 3-phosphate dehydrogenase, NAD binding domain. GAPDH is a tetrameric NAD-binding enzyme involved in glycolysis and glyconeogenesis. N-terminal domain is a Rossmann NAD(P) binding fold.	GO:0006006|glucose metabolic process;GO:0006096|glycolytic process;GO:0000226|microtubule cytoskeleton organization;GO:0051402|neuron apoptotic process;GO:0035606|peptidyl-cysteine S-trans-nitrosylation;GO:0050821|protein stabilization;GO:0006417|regulation of translation;	GO:0005737|cytoplasm;GO:0005829|cytosol;GO:0097452|GAIT complex;GO:0015630|microtubule cytoskeleton;GO:0005634|nucleus;	GO:0004365|glyceraldehyde-3-phosphate dehydrogenase (NAD+) (phosphorylating) activity;GO:0008017|microtubule binding;GO:0051287|NAD binding;GO:0050661|NADP binding;GO:0035605|peptidyl-cysteine S-nitrosylase activity;	K00134	GAPDH, gapA; glyceraldehyde 3-phosphate dehydrogenase [EC:1.2.1.12]
ENSG00000234336	0.343995	-1.53954	0.0331983	down	yes	JAZF1-AS1	antisense	chr7:28180322-28243917:+	gi|221039528|dbj|BAH11527.1|	unnamed protein product [Homo sapiens]	gi|551861491|tpe|HG500144.1|	TPA: Homo sapiens long non-coding RNA OTTHUMT00000327760.2 (AC005017.1 gene), antisense	Q80ZQ5	60.8	3e-10	Juxtaposed with another zinc finger protein 1	.	.	.	.	pfam13900	GVQW	Putative binding domain. This short domain is often found nested inside other longer domains. The function is not known, but the domain carries a highly conserved GVQW motif. The members are rich in proline and cysteine. This may be a binding domain.	GO:0006629|lipid metabolic process;GO:0000122|negative regulation of transcription from RNA polymerase II promoter;GO:0006351|transcription, DNA-templated;	GO:0005737|cytoplasm;GO:0005730|nucleolus;GO:0005634|nucleus;GO:0017053|transcriptional repressor complex;	GO:0046872|metal ion binding;GO:0003676|nucleic acid binding;GO:0003714|transcription corepressor activity;	K19495	JAZF1; juxtaposed with another zinc finger protein 1
ENSG00000234690	1.92723	0.946531	0.0359727	up	yes	AC073283.4	lincRNA	chr2:47192405-47345074:-	gi|821027361|ref|XP_012356877.1|	PREDICTED: uncharacterized protein LOC105738624 [Nomascus leucogenys]	gi|571330810|ref|NR_110207.1|	Homo sapiens uncharacterized LOC101927043 (LOC101927043), transcript variant 1, long non-coding RNA	E7EU14	64.7	4e-11	Protein PPP5D1	.	.	.	.	pfam13900	GVQW	Putative binding domain. This short domain is often found nested inside other longer domains. The function is not known, but the domain carries a highly conserved GVQW motif. The members are rich in proline and cysteine. This may be a binding domain.	.	.	.	.	.
ENSG00000235043	0.59708	-0.744004	0.0169656	down	yes	TECRP1	processed_pseudogene	chr4:86949669-86950113:-	gi|119626380|gb|EAX05975.1|	hCG16318, isoform CRA_a [Homo sapiens]	gi|198041908|ref|NG_005327.4|	Homo sapiens trans-2,3-enoyl-CoA reductase pseudogene 1 (TECRP1) on chromosome 4	Q9NZ01	308	1e-104	Very-long-chain enoyl-CoA reductase	.	.	.	.	pfam02544	Steroid_dh	3-oxo-5-alpha-steroid 4-dehydrogenase. This family consists of 3-oxo-5-alpha-steroid 4-dehydrogenases, EC:1.3.99.5 Also known as Steroid 5-alpha-reductase, the reaction catalysed by this enzyme is: 3-oxo-5-alpha-steroid + acceptor <=> 3-oxo-delta(4)-steroid + reduced acceptor. The Steroid 5-alpha-reductase enzyme is responsible for the formation of dihydrotestosterone, this hormone promotes the d…	GO:0030497|fatty acid elongation;GO:0035338|long-chain fatty-acyl-CoA biosynthetic process;GO:0042761|very long-chain fatty acid biosynthetic process;	GO:0005783|endoplasmic reticulum;GO:0005789|endoplasmic reticulum membrane;GO:0030176|integral component of endoplasmic reticulum membrane;GO:0005634|nucleus;	GO:0017099|very-long-chain-acyl-CoA dehydrogenase activity;	K10258	TER, TSC13, CER10; very-long-chain enoyl-CoA reductase [EC:1.3.1.93]
ENSG00000235052	0.575111	-0.798088	0.0372019	down	yes	RP1-150O5.3	lincRNA	chr1:23549139-23550915:-	gi|119615465|gb|EAW95059.1|	hCG2041905, partial [Homo sapiens]	gi|551895657|tpe|HG491778.1|	TPA: Homo sapiens long non-coding RNA OTTHUMT00000091258.1 (RP1-150O5.3 gene), lincRNA	.	.	.	.	.	.	.	.	pfam15453	Pilt	Protein incorporated later into Tight Junctions. Pilt is a family of eukaryotic tight junction-proteins that binds to guanylate-kinase. Pilt is a component of TJs (Tight junctions) rather than AJs (Adhesin junctions). The protein is incorporated into TJs after TJ strands are formed, thereby suggesting the name Pilt for 'protein incorporated later into TJs'. Pilt binds to the guanylate-kinase regi…	.	.	.	.	.
ENSG00000235081	2.1965	1.13521	0.0241691	up	yes	AC010492.2	processed_pseudogene	chr19:54229036-54230213:+	gi|403292717|ref|XP_003937378.1|	PREDICTED: protein LSM14 homolog A [Saimiri boliviensis boliviensis]	gi|95147532|gb|AC163770.3|	Pan troglodytes BAC clone CH251-4E4 from chromosome unknown, complete sequence	Q8ND56	191	2e-97	Protein LSM14 homolog A	.	.	.	.	pfam09532	FDF	FDF domain. The FDF domain, so called because of the conserved FDF at its N termini, is an entirely alpha-helical domain with multiple exposed hydrophilic loops. It is found at the C terminus of Scd6p-like SM domains. It is also found with other divergent Sm domains and in proteins such as Dcp3p and FLJ21128, where it is found N terminal to the YjeF-N domain, a novel Rossmann fold domain.	GO:0033962|cytoplasmic mRNA processing body assembly;GO:0007275|multicellular organismal development;GO:0060340|positive regulation of type I interferon-mediated signaling pathway;GO:0006417|regulation of translation;GO:0039529|RIG-I signaling pathway;	GO:0005737|cytoplasm;GO:0000932|cytoplasmic mRNA processing body;GO:0010494|cytoplasmic stress granule;GO:0043231|intracellular membrane-bounded organelle;	GO:0003690|double-stranded DNA binding;GO:0003725|double-stranded RNA binding;GO:0044822|poly(A) RNA binding;GO:0003727|single-stranded RNA binding;	K18749	LSM14, RAP55, SCD6; protein LSM14
ENSG00000235213	0.47042	-1.08798	0.0485051	down	yes	OR6E1P	unprocessed_pseudogene	chr14:22702143-22703065:+	gi|694955692|ref|XP_009425914.1|	PREDICTED: LOW QUALITY PROTEIN: olfactory receptor 49-like [Pan troglodytes]	gi|300793631|ref|NG_002244.3|	Homo sapiens olfactory receptor, family 6, subfamily E, member 1 pseudogene (OR6E1P) on chromosome 14	Q9Z1V0	99.8	1e-22	Olfactory receptor 49	.	.	.	.	pfam13853	7tm_4	Olfactory receptor. The members of this family are transmembrane olfactory receptors.	GO:0007186|G-protein coupled receptor signaling pathway;GO:0007608|sensory perception of smell;	GO:0016021|integral component of membrane;GO:0005886|plasma membrane;	GO:0004930|G-protein coupled receptor activity;GO:0019840|isoprenoid binding;GO:0004984|olfactory receptor activity;	K04257	OLFR; olfactory receptor
ENSG00000235332	0.19799	-2.3365	0.0386811	down	yes	RPSAP76	processed_pseudogene	chr9:125194649-125195821:-	gi|593761957|ref|XP_007119636.1|	PREDICTED: 40S ribosomal protein SA-like [Physeter catodon]	gi|635083136|ref|XM_007971703.1|	PREDICTED: Chlorocebus sabaeus ribosomal protein SA (RPSA), transcript variant X4, mRNA	A3RLT6	23.5	4e-71	40S ribosomal protein SA	SPAPJ698.02c	114	1e-52	COG0052	pfam00318	Ribosomal_S2	Ribosomal protein S2.	GO:0000028|ribosomal small subunit assembly;GO:0006412|translation;	GO:0022627|cytosolic small ribosomal subunit;	GO:0003735|structural constituent of ribosome;	.	.
ENSG00000235413	3.11988	1.64149	0.0248572	up	yes	KRT18P63	processed_pseudogene	chr4:17911674-17912976:+	gi|795603391|ref|XP_011727312.1|	PREDICTED: keratin, type I cytoskeletal 18 [Macaca nemestrina]	gi|298358973|ref|NG_022049.1|	Homo sapiens keratin 18 pseudogene 63 (KRT18P63) on chromosome 4	P05783	327	1e-107	Keratin, type I cytoskeletal 18	.	.	.	.	pfam00038	Filament	Intermediate filament protein.	GO:0009653|anatomical structure morphogenesis;GO:0007049|cell cycle;GO:0097191|extrinsic apoptotic signaling pathway;GO:0043000|Golgi to plasma membrane CFTR protein transport;GO:0097284|hepatocyte apoptotic process;GO:0045104|intermediate filament cytoskeleton organization;GO:0043066|negative regulation of apoptotic process;GO:0033209|tumor necrosis factor-mediated signaling pathway;GO:0016032|v…	GO:0071944|cell periphery;GO:0005913|cell-cell adherens junction;GO:0034451|centriolar satellite;GO:0005737|cytoplasm;GO:0070062|extracellular exosome;GO:0005882|intermediate filament;GO:0045095|keratin filament;GO:0005815|microtubule organizing center;GO:0005730|nucleolus;GO:0048471|perinuclear region of cytoplasm;	GO:0098641|cadherin binding involved in cell-cell adhesion;GO:0044822|poly(A) RNA binding;GO:0097110|scaffold protein binding;GO:0005198|structural molecule activity;	K07604	KRT1; type I keratin, acidic
ENSG00000235949	0.506951	-0.980083	0.0465314	down	yes	AC061961.2	antisense	chr2:154696462-154697817:-	gi|635057984|ref|XP_007963183.1|	PREDICTED: uncharacterized protein LOC103217113 [Chlorocebus sabaeus]	gi|551847352|tpe|HG494769.1|	TPA: Homo sapiens long non-coding RNA OTTHUMT00000332538.1 (AC061961.2 gene), antisense	.	.	.	.	.	.	.	.	pfam06317	Arena_RNA_pol	Arenavirus RNA polymerase. This family consists of several Arenavirus RNA polymerase proteins (EC:2.7.7.48).	.	.	.	.	.
ENSG00000236480	0.578569	-0.78944	0.0139277	down	yes	PKMP1	processed_pseudogene	chr1:114535995-114537840:+	gi|821008891|ref|XP_012355849.1|	PREDICTED: LOW QUALITY PROTEIN: pyruvate kinase PKM-like [Nomascus leucogenys]	gi|586800755|ref|NG_022800.2|	Homo sapiens pyruvate kinase, muscle pseudogene 1 (PKMP1) on chromosome 1	P52480	638	0	Pyruvate kinase PKM	SPAC4H3.10c	313	6e-103	COG0469	pfam00224	PK	Pyruvate kinase, barrel domain. This domain of the is actually a small beta-barrel domain nested within a larger TIM barrel. The active site is found in a cleft between the two domains.	GO:0006096|glycolytic process;GO:0012501|programmed cell death;	GO:0005913|cell-cell adherens junction;GO:0005929|cilium;GO:0005737|cytoplasm;GO:0070062|extracellular exosome;GO:0031012|extracellular matrix;GO:1903561|extracellular vesicle;GO:0005739|mitochondrion;GO:0043209|myelin sheath;GO:0005634|nucleus;GO:0005886|plasma membrane;GO:0031982|vesicle;	GO:0005524|ATP binding;GO:0098641|cadherin binding involved in cell-cell adhesion;GO:0016301|kinase activity;GO:0000287|magnesium ion binding;GO:0023026|MHC class II protein complex binding;GO:0044822|poly(A) RNA binding;GO:0030955|potassium ion binding;GO:0004743|pyruvate kinase activity;	K00873	PK, pyk; pyruvate kinase [EC:2.7.1.40]
ENSG00000236512	0.445856	-1.16535	0.0400174	down	yes	RP3-336K20__B.2	processed_pseudogene	chr6:7620422-7620878:+	gi|528767520|gb|EPY87179.1|	hypothetical protein CB1_000261035 [Camelus ferus]	gi|300795335|ref|NG_003155.3|	Homo sapiens ribosomal protein L29 pseudogene 1 (RPL29P1) on chromosome 6	Q8HXB8	57.4	4e-15	60S ribosomal protein L29	.	.	.	.	pfam01779	Ribosomal_L29e	Ribosomal L29e protein family.	GO:0006412|translation;	GO:0005840|ribosome;	GO:0003735|structural constituent of ribosome;	.	.
ENSG00000236544	2.01937	1.01391	0.0288458	up	yes	AC008060.8	lincRNA	chr7:155421206-155457099:-	gi|119624939|gb|EAX04534.1|	hCG2041227, partial [Homo sapiens]	gi|551863157|tpe|HG500764.1|	TPA: Homo sapiens long non-coding RNA OTTHUMT00000322326.1 (AC008060.8 gene), lincRNA	.	.	.	.	.	.	.	.	pfam05904	DUF863	Plant protein of unknown function (DUF863). This family consists of a number of hypothetical proteins from Arabidopsis thaliana and Oryza sativa. The function of this family is unknown.	.	.	.	.	.
ENSG00000237417	1.62826	0.703333	0.00453771	up	yes	XRCC6P1	processed_pseudogene	chr10:93206857-93209627:-	gi|426394618|ref|XP_004063588.1|	PREDICTED: X-ray repair cross-complementing protein 6 isoform 2 [Gorilla gorilla gorilla]	gi|297301509|ref|XR_011123.2|	PREDICTED: Macaca mulatta x-ray repair cross-complementing protein 6-like (XRCC6), miscRNA	P12956	795	0	X-ray repair cross-complementing protein 6	.	.	.	.	pfam02735	Ku	Ku70/Ku80 beta-barrel domain. The Ku heterodimer (composed of Ku70 and Ku80) contributes to genomic integrity through its ability to bind DNA double-strand breaks and facilitate repair by the non-homologous end-joining pathway. This is the central DNA-binding beta-barrel domain. This domain is found in both the Ku70 and Ku80 proteins that form a DNA binding heterodimer.	GO:0007420|brain development;GO:0071475|cellular hyperosmotic salinity response;GO:0071480|cellular response to gamma radiation;GO:0071481|cellular response to X-ray;GO:0006266|DNA ligation;GO:0006310|DNA recombination;GO:0097680|double-strand break repair via classical nonhomologous end joining;GO:0006303|double-strand break repair via nonhomologous end joining;GO:0075713|establishment of integr…	GO:0005829|cytosol;GO:0043564|Ku70:Ku80 complex;GO:0016020|membrane;GO:0070419|nonhomologous end joining complex;GO:0000784|nuclear chromosome, telomeric region;GO:0000783|nuclear telomere cap complex;GO:0005730|nucleolus;GO:0005654|nucleoplasm;GO:0005634|nucleus;GO:0005667|transcription factor complex;	GO:0051575|5'-deoxyribose-5-phosphate lyase activity;GO:0005524|ATP binding;GO:0004003|ATP-dependent DNA helicase activity;GO:0003684|damaged DNA binding;GO:0003677|DNA binding;GO:0003690|double-stranded DNA binding;GO:0044877|macromolecular complex binding;GO:0044822|poly(A) RNA binding;GO:0008022|protein C-terminus binding;GO:0042162|telomeric DNA binding;GO:0044212|transcription regulatory reg…	K10884	XRCC6, KU70, G22P1; ATP-dependent DNA helicase 2 subunit 1
ENSG00000237461	0.408936	-1.29005	0.0330564	down	yes	RP11-554F20.1	lincRNA	chr9:99585786-99819889:-	.	.	gi|565324250|ref|NR_109802.1|	Homo sapiens uncharacterized LOC101928438 (LOC101928438), long non-coding RNA	.	.	.	.	.	.	.	.	pfam11635	Med16	Mediator complex subunit 16. Mediator is a large complex of up to 33 proteins that is conserved from plants through fungi to humans - the number and representation of individual subunits varying with species. It is arranged into four different sections, a core, a head, a tail and a kinase-activity part, and the number of subunits within each of these is what varies with species. Overall, Mediator…	.	.	.	.	.
ENSG00000237501	0.14654	-2.77063	0.0388815	down	yes	RP11-816B4.1	processed_pseudogene	chr3:172830981-172831229:-	gi|755753882|ref|XP_011282947.1|	PREDICTED: methylmalonic aciduria and homocystinuria type C protein isoform X2 [Felis catus]	gi|22549655|gb|AC108667.9|	Homo sapiens 3 BAC RP11-816B4 (Roswell Park Cancer Institute Human BAC Library) complete sequence	Q5E9C8	86.3	2e-20	Methylmalonic aciduria and homocystinuria type C protein homolog	.	.	.	.	pfam15449	Retinal	Retinal protein. This family of proteins is found in the photoreceptor cells of the retina. Mutations of the gene encoding this protein have been associated with retinal disorders such as retinitis pigmentosa and late-onset progressive retinal atrophy. The function of this family of proteins is unknown, but it is likely to be important in the development and function of the retina.	GO:0009236|cobalamin biosynthetic process;GO:0009235|cobalamin metabolic process;GO:0070988|demethylation;GO:0006749|glutathione metabolic process;GO:0055114|oxidation-reduction process;	GO:0005739|mitochondrion;	GO:0031419|cobalamin binding;GO:0033787|cyanocobalamin reductase (cyanide-eliminating) activity;GO:0032451|demethylase activity;GO:0071949|FAD binding;GO:0043295|glutathione binding;GO:0016491|oxidoreductase activity;	.	.
ENSG00000238279	8.68576	3.11865	0.0269875	up	yes	BX470102.3	antisense	chr1:153533603-153535115:+	.	.	gi|551898241|tpe|HG492777.1|	TPA: Homo sapiens long non-coding RNA OTTHUMT00000037721.1 (BX470102.3 gene), antisense	.	.	.	.	.	.	.	.	pfam10326	7TM_GPCR_Str	Serpentine type 7TM GPCR chemoreceptor Str. Chemoreception is mediated in Caenorhabditis elegans by members of the seven-transmembrane G-protein-coupled receptor class (7TM GPCRs) of proteins which are of the serpentine type. Str is a member of the Str superfamily of chemoreceptors. Almost a quarter (22.5%) of str and srj family genes and pseudogenes in C. elegans appear to have been newly formed…	.	.	.	.	.
ENSG00000239462	0.307226	-1.70263	0.0278127	down	yes	CTD-2021J15.1	antisense	chr3:98902424-99018562:+	.	.	gi|551850164|tpe|HG495847.1|	TPA: Homo sapiens long non-coding RNA OTTHUMT00000353103.1 (CTD-2021J15.1 gene), antisense	.	.	.	.	.	.	.	.	pfam01976	DUF116	Protein of unknown function DUF116. This archaebacterial protein has no known function. The protein contains seven conserved cysteines and may also be an integral membrane protein.	.	.	.	.	.
ENSG00000240038	0.665975	-0.586459	0.00320325	down	yes	AMY2B	protein_coding	chr1:103553815-103579534:+	gi|10280622|ref|NP_066188.1|	alpha-amylase 2B precursor [Homo sapiens]	gi|19807869|gb|AC105272.2|	Homo sapiens chromosome 1 clone RP5-1108M17, complete sequence	P04746	94.7	5e-22	Pancreatic alpha-amylase	CAP0168	99	3e-20	COG0366	pfam00022	Actin	Actin.	GO:0005975|carbohydrate metabolic process;GO:0007586|digestion;	GO:0070062|extracellular exosome;	GO:0004556|alpha-amylase activity;GO:0046872|metal ion binding;	K01176	E3.2.1.1, amyA, malS; alpha-amylase [EC:3.2.1.1]
ENSG00000240219	0.641042	-0.641509	0.0411946	down	yes	RP11-430C7.5	lincRNA	chr1:204626775-204629712:+	gi|13358650|dbj|BAB33050.1|	hypothetical protein [Macaca fascicularis]	gi|551899014|tpe|HG493105.1|	TPA: Homo sapiens long non-coding RNA OTTHUMT00000097796.1 (RP11-430C7.5 gene), lincRNA	.	.	.	.	.	.	.	.	pfam14589	NrfD_2	Polysulfide reductase. Bacterial polysulfide reductase is an integral membrane protein complex responsible for quinone-coupled reduction of polysulfide, a process important in extreme environments such as deep-sea vents and hot springs. Polysulfides are a class of compounds composed of chains of sulfur atoms, which in their simplest form are present as an anion with general formula Sn(2-). In nat…	.	.	.	.	.
ENSG00000241362	0.49055	-1.02753	0.0415925	down	yes	RPL36AP43	processed_pseudogene	chr15:89687937-89688243:-	gi|795149430|ref|XP_011838203.1|	PREDICTED: 60S ribosomal protein L36a-like [Mandrillus leucophaeus]	gi|224494068|ref|NG_010155.1|	Homo sapiens ribosomal protein L36a pseudogene 43 (RPL36AP43) on chromosome 15	P83883	99.4	4e-31	60S ribosomal protein L36a	YNL162w	69.3	5e-18	COG1631	pfam00935	Ribosomal_L44	Ribosomal protein L44.	GO:0032526|response to retinoic acid;GO:0006412|translation;	GO:0022625|cytosolic large ribosomal subunit;	GO:0003735|structural constituent of ribosome;	K02929	RP-L44e, RPL44; large subunit ribosomal protein L44e
ENSG00000241907	6.0717	2.6021	0.0420922	up	yes	RPS20P4	processed_pseudogene	chr5:150021567-150021921:-	gi|696960694|ref|XP_009568757.1|	PREDICTED: 40S ribosomal protein S20 [Cuculus canorus]	gi|297307098|ref|NG_021389.1|	Homo sapiens HMG box domain containing 3 (HMGXB3), RefSeqGene on chromosome 5	P60868	113	1e-44	40S ribosomal protein S20	SPCC576.09	99	6e-29	COG0051	pfam00338	Ribosomal_S10	Ribosomal protein S10p/S20e. This family includes small ribosomal subunit S10 from prokaryotes and S20 from eukaryotes.	GO:0006412|translation;	GO:0022627|cytosolic small ribosomal subunit;	GO:0003723|RNA binding;GO:0003735|structural constituent of ribosome;	K02969	RP-S20e, RPS20; small subunit ribosomal protein S20e
ENSG00000243137	1.5067	0.591394	0.0289329	up	yes	PSG4	protein_coding	chr19:43192702-43207299:-	gi|42560235|ref|NP_002771.2|	pregnancy-specific beta-1-glycoprotein 4 isoform 1 precursor [Homo sapiens]	gi|23958881|gb|BC035419.1|	Homo sapiens pregnancy specific beta-1-glycoprotein 4, mRNA (cDNA clone IMAGE:4821419), with apparent retained intron	P11465	54.7	6e-08	Pregnancy-specific beta-1-glycoprotein 2	.	.	.	.	pfam13895	Ig_2	Immunoglobulin domain. This domain contains immunoglobulin-like domains.	GO:0007565|female pregnancy;	GO:0005576|extracellular region;	.	K06500	PSG; pregnancy specific beta-1-glycoprotein
ENSG00000243648	0.297492	-1.74907	0.0422137	down	yes	RP11-215P8.1	processed_pseudogene	chr5:134422838-134423335:+	gi|507531076|ref|XP_004649621.1|	PREDICTED: 40S ribosomal protein S10 isoform X2 [Jaculus jaculus]	gi|19747165|gb|AC109454.3|	Homo sapiens chromosome 5 clone RP11-215P8, complete sequence	P46783	259	3e-87	40S ribosomal protein S10	SPAC31G5.17c	119	4e-33	COG5045	pfam03501	S10_plectin	Plectin/S10 domain. This presumed domain is found at the N-terminus of some isoforms of the cytoskeletal muscle protein plectin as well as the ribosomal S10 protein. This domain may be involved in RNA binding.	GO:0000184|nuclear-transcribed mRNA catabolic process, nonsense-mediated decay;GO:0000028|ribosomal small subunit assembly;GO:0006364|rRNA processing;GO:0006614|SRP-dependent cotranslational protein targeting to membrane;GO:0006412|translation;GO:0006413|translational initiation;GO:0019083|viral transcription;	GO:0005829|cytosol;GO:0022627|cytosolic small ribosomal subunit;GO:0070062|extracellular exosome;GO:0031012|extracellular matrix;GO:0005925|focal adhesion;GO:0016020|membrane;GO:0005730|nucleolus;GO:0005654|nucleoplasm;GO:0005840|ribosome;	GO:0044822|poly(A) RNA binding;GO:0003735|structural constituent of ribosome;	K02947	RP-S10e, RPS10; small subunit ribosomal protein S10e
ENSG00000243710	0.571077	-0.808243	0.000695042	down	yes	CFAP57	protein_coding	chr1:43172149-43254358:+	gi|345199335|ref|NP_001182760.2|	cilia- and flagella-associated protein 57 isoform a [Homo sapiens]	gi|345199334|ref|NM_001195831.2|	Homo sapiens cilia and flagella associated protein 57 (CFAP57), transcript variant 5, mRNA	Q96MR6	2513	0	Cilia- and flagella-associated protein 57	.	.	.	.	pfam05557	MAD	Mitotic checkpoint protein. This family consists of several eukaryotic mitotic checkpoint (Mitotic arrest deficient or MAD) proteins. The mitotic spindle checkpoint monitors proper attachment of the bipolar spindle to the kinetochores of aligned sister chromatids and causes a cell cycle arrest in prometaphase when failures occur. Multiple components of the mitotic spindle checkpoint have been ide…	.	.	.	.	.
ENSG00000243738	0.424295	-1.23686	0.0264297	down	yes	RN7SL181P	misc_RNA	chr9:121203159-121203435:+	gi|594691438|ref|XP_007193055.1|	PREDICTED: uncharacterized protein LOC103017900 [Balaenoptera acutorostrata scammoni]	gi|11120983|emb|AL137068.10|	Human DNA sequence from clone RP11-165P4 on chromosome 9q34.11-34.13, complete sequence	.	.	.	.	.	.	.	.	pfam08450	SGL	SMP-30/Gluconolaconase/LRE-like region. This family describes a region that is found in proteins expressed by a variety of eukaryotic and prokaryotic species. These proteins include various enzymes, such as senescence marker protein 30 (SMP-30), gluconolactonase and luciferin-regenerating enzyme (LRE). SMP-30 is known to hydrolyse diisopropyl phosphorofluoridate in the liver, and has been noted a…	.	.	.	.	.
ENSG00000243926	0.475787	-1.07161	0.0455568	down	yes	TIPARP-AS1	antisense	chr3:156671862-156674378:-	gi|397521244|ref|XP_003830707.1|	PREDICTED: uncharacterized protein LOC100993800 [Pan paniscus]	gi|551851178|tpe|HG496222.1|	TPA: Homo sapiens long non-coding RNA OTTHUMT00000351612.1 (RP11-791I24.4 gene), antisense	.	.	.	.	.	.	.	.	pfam05999	Herpes_U5	Herpesvirus U5-like family. This family of Herpesvirus includes U4, U5 and UL27.	.	.	.	.	.
ENSG00000244061	0.152834	-2.70996	0.0201497	down	yes	RP11-389C8.1	processed_pseudogene	chr5:72381794-72382393:+	gi|640801927|ref|XP_008057269.1|	PREDICTED: 60S ribosomal protein L10a [Tarsius syrichta]	gi|224494585|ref|NG_010309.1|	Homo sapiens ribosomal protein L10a pseudogene 8 (RPL10AP8) on chromosome 5	P62907	76.3	2e-31	60S ribosomal protein L10a	SPCC1183.08c	60.5	1e-18	COG0081	pfam00687	Ribosomal_L1	Ribosomal protein L1p/L10e family. This family includes prokaryotic L1 and eukaryotic L10.	GO:0000470|maturation of LSU-rRNA;GO:0045471|response to ethanol;GO:0006412|translation;	GO:0022625|cytosolic large ribosomal subunit;GO:0070062|extracellular exosome;GO:0005925|focal adhesion;GO:0016020|membrane;GO:0005730|nucleolus;	GO:0044822|poly(A) RNA binding;GO:0003723|RNA binding;GO:0003735|structural constituent of ribosome;	K02865	RP-L10Ae, RPL10A; large subunit ribosomal protein L10Ae
ENSG00000244119	0.653448	-0.613855	0.0269479	down	yes	PDCL3P4	processed_pseudogene	chr3:101712472-101713191:+	gi|114579202|ref|XP_525834.2|	PREDICTED: phosducin-like protein 3 [Pan troglodytes]	gi|197382349|ref|NR_002941.2|	Homo sapiens phosducin-like 3 pseudogene 4 (PDCL3P4), non-coding RNA	Q9H2J4	43.1	3e-95	Phosducin-like protein 3	.	.	.	.	pfam02114	Phosducin	Phosducin.	GO:0001525|angiogenesis;GO:0006915|apoptotic process;GO:2000059|negative regulation of protein ubiquitination involved in ubiquitin-dependent protein catabolic process;GO:0045766|positive regulation of angiogenesis;GO:0001938|positive regulation of endothelial cell proliferation;GO:0008616|queuosine biosynthetic process;GO:0050730|regulation of peptidyl-tyrosine phosphorylation;GO:0016032|viral p…	GO:0005737|cytoplasm;GO:0005634|nucleus;	GO:0044183|protein binding involved in protein folding;	.	.
ENSG00000244328	0.169074	-2.56427	0.0371744	down	yes	RN7SL845P	misc_RNA	chr7:152757662-152757951:+	gi|743741691|ref|XP_010965357.1|	PREDICTED: uncharacterized protein LOC105078493 [Camelus bactrianus]	gi|18693596|gb|AC092180.5|	Homo sapiens BAC clone RP11-1375C19 from 7, complete sequence	.	.	.	.	.	.	.	.	pfam13900	GVQW	Putative binding domain. This short domain is often found nested inside other longer domains. The function is not known, but the domain carries a highly conserved GVQW motif. The members are rich in proline and cysteine. This may be a binding domain.	.	.	.	.	.
ENSG00000244468	1.59863	0.67684	0.0112203	up	yes	RP11-206M11.7	antisense	chr3:149284782-149333653:+	gi|119584862|gb|EAW64458.1|	hCG2038441, partial [Homo sapiens]	gi|551851041|tpe|HG496166.1|	TPA: Homo sapiens long non-coding RNA OTTHUMT00000356331.1 (RP11-206M11.7 gene), antisense	.	.	.	.	.	.	.	.	pfam00475	IGPD	Imidazoleglycerol-phosphate dehydratase.	.	.	.	.	.
ENSG00000248196	8.09205	3.01651	0.0223668	up	yes	RP11-476C8.2	processed_pseudogene	chr4:87166844-87167734:+	gi|403281719|ref|XP_003932325.1|	PREDICTED: uracil-DNA glycosylase [Saimiri boliviensis boliviensis]	gi|15638861|gb|AC092658.2|	Homo sapiens BAC clone RP11-476C8 from 4, complete sequence	P13051	247	2e-78	Uracil-DNA glycosylase	DR0689	137	2e-37	COG0692	pfam03167	UDG	Uracil DNA glycosylase superfamily.	GO:0006284|base-excision repair;GO:0097510|base-excision repair, AP site formation via deaminated base removal;GO:0045008|depyrimidination;GO:0006281|DNA repair;GO:0043066|negative regulation of apoptotic process;GO:0045830|positive regulation of isotype switching;GO:0016446|somatic hypermutation of immunoglobulin genes;GO:0016447|somatic recombination of immunoglobulin gene segments;GO:0016032|v…	GO:0005654|nucleoplasm;GO:0005634|nucleus;	GO:0003684|damaged DNA binding;GO:0019899|enzyme binding;GO:0004844|uracil DNA N-glycosylase activity;	K03648	UNG, UDG; uracil-DNA glycosylase [EC:3.2.2.27]
ENSG00000248206	2.40602	1.26665	0.0440571	up	yes	RP11-739P1.2	sense_intronic	chr4:183987678-183988750:+	.	.	gi|551854976|tpe|HG497584.1|	TPA: Homo sapiens long non-coding RNA OTTHUMT00000361438.1 (RP11-739P1.2 gene), sense_intronic	.	.	.	.	.	.	.	.	pfam10113	Fibrillarin_2	Fibrillarin-like archaeal protein. Members of this family of proteins include archaeal fibrillarin homologs.	.	.	.	.	.
ENSG00000248367	1.56617	0.647241	0.0291255	up	yes	CTB-129O4.1	antisense	chr5:180293245-180295253:+	gi|635125997|ref|XP_008013821.1|	PREDICTED: uncharacterized protein LOC103245204 [Chlorocebus sabaeus]	gi|551858306|tpe|HG498846.1|	TPA: Homo sapiens long non-coding RNA OTTHUMT00000372565.1 (CTB-129O4.1 gene), antisense	.	.	.	.	.	.	.	.	pfam15449	Retinal	Retinal protein. This family of proteins is found in the photoreceptor cells of the retina. Mutations of the gene encoding this protein have been associated with retinal disorders such as retinitis pigmentosa and late-onset progressive retinal atrophy. The function of this family of proteins is unknown, but it is likely to be important in the development and function of the retina.	.	.	.	.	.
ENSG00000248927	7.663	2.93791	0.0253755	up	yes	CTD-2334D19.1	lincRNA	chr5:120781218-120790778:+	.	.	gi|551857103|tpe|HG498391.1|	TPA: Homo sapiens long non-coding RNA OTTHUMT00000371063.1 (CTD-2334D19.1 gene), lincRNA	.	.	.	.	.	.	.	.	pfam09771	Tmemb_18A	Transmembrane protein 188. The function of this family of transmembrane proteins has not, as yet, been determined.	.	.	.	.	.
ENSG00000249378	7.67059	2.93934	0.0263678	up	yes	LINC01060	lincRNA	chr4:188400736-188681051:+	gi|119625010|gb|EAX04605.1|	hCG1659014 [Homo sapiens]	gi|551855098|tpe|HG497634.1|	TPA: Homo sapiens long non-coding RNA OTTHUMT00000359857.1 (RP11-219G10.3 gene), lincRNA	.	.	.	.	.	.	.	.	pfam08083	PROCN	PROCN (NUC071) domain. The PROCN domain is the central domain in pre-mRNA splicing factors of PRO8 family.	.	.	.	.	.
ENSG00000249850	0.289447	-1.78863	0.0485941	down	yes	KRT18P31	processed_pseudogene	chr5:36885206-36886497:+	gi|694911532|ref|XP_009447580.1|	PREDICTED: LOW QUALITY PROTEIN: keratin, type I cytoskeletal 20-like [Pan troglodytes]	gi|426214663|ref|NG_007924.2|	Homo sapiens keratin 18 pseudogene 31 (KRT18P31) on chromosome 5	P05783	456	5e-176	Keratin, type I cytoskeletal 18	.	.	.	.	pfam00038	Filament	Intermediate filament protein.	GO:0009653|anatomical structure morphogenesis;GO:0007049|cell cycle;GO:0097191|extrinsic apoptotic signaling pathway;GO:0043000|Golgi to plasma membrane CFTR protein transport;GO:0097284|hepatocyte apoptotic process;GO:0045104|intermediate filament cytoskeleton organization;GO:0043066|negative regulation of apoptotic process;GO:0033209|tumor necrosis factor-mediated signaling pathway;GO:0016032|v…	GO:0071944|cell periphery;GO:0005913|cell-cell adherens junction;GO:0034451|centriolar satellite;GO:0005737|cytoplasm;GO:0070062|extracellular exosome;GO:0005882|intermediate filament;GO:0045095|keratin filament;GO:0005815|microtubule organizing center;GO:0005730|nucleolus;GO:0048471|perinuclear region of cytoplasm;	GO:0098641|cadherin binding involved in cell-cell adhesion;GO:0044822|poly(A) RNA binding;GO:0097110|scaffold protein binding;GO:0005198|structural molecule activity;	K07604	KRT1; type I keratin, acidic
ENSG00000250071	0.43707	-1.19406	0.0472389	down	yes	CTD-2060C23.1	processed_pseudogene	chr5:74798994-74800100:+	gi|676270067|gb|KFO25310.1|	Actin-related protein 2/3 complex subunit 1A [Fukomys damarensis]	gi|172088128|ref|NG_002354.4|	Homo sapiens actin related protein 2/3 complex subunit 1A pseudogene (LOC260421) on chromosome 5	Q92747	152	2e-151	Actin-related protein 2/3 complex subunit 1A	.	.	.	.	pfam00400	WD40	WD domain, G-beta repeat.	GO:0030036|actin cytoskeleton organization;GO:0034314|Arp2/3 complex-mediated actin nucleation;GO:0048013|ephrin receptor signaling pathway;GO:0038096|Fc-gamma receptor signaling pathway involved in phagocytosis;	GO:0015629|actin cytoskeleton;GO:0005885|Arp2/3 protein complex;GO:0005829|cytosol;GO:0070062|extracellular exosome;GO:0036195|muscle cell projection membrane;	GO:0003779|actin binding;GO:0051015|actin filament binding;	K05757	ARPC1A_B; actin related protein 2/3 complex, subunit 1A/1B
ENSG00000250138	0.439149	-1.18722	0.0397536	down	yes	RP11-848G14.5	unprocessed_pseudogene	chr5:69631963-69636399:+	gi|767937464|ref|XP_011542090.1|	PREDICTED: LOW QUALITY PROTEIN: putative POM121-like protein 1-like isoform X1 [Homo sapiens]	gi|38016034|gb|AC139495.2|	Homo sapiens chromosome 5 clone RP11-848G14, complete sequence	A6NNC1	1197	0	Putative POM121-like protein 1-like	.	.	.	.	pfam15229	POM121	POM121 family.	.	GO:0016021|integral component of membrane;	.	.	.
ENSG00000250324	0.0911069	-3.4563	0.0398542	down	yes	MRPL22P1	processed_pseudogene	chr4:56320719-56321334:-	gi|591301419|ref|XP_007077640.1|	PREDICTED: 39S ribosomal protein L22, mitochondrial isoform X2 [Panthera tigris altaica]	gi|223942057|ref|NG_002854.2|	Homo sapiens mitochondrial ribosomal protein L22 pseudogene 1 (MRPL22P1) on chromosome 4	Q9NWU5	74.7	2e-41	39S ribosomal protein L22, mitochondrial	.	.	.	.	pfam04177	TAP42	TAP42-like family. The TOR signalling pathway activates a cell-growth program in response to nutrients. TIP41 (pfam04176) interacts with TAP42 and negatively regulates the TOR signaling pathway.	GO:0070125|mitochondrial translational elongation;GO:0070126|mitochondrial translational termination;	GO:0005743|mitochondrial inner membrane;GO:0005762|mitochondrial large ribosomal subunit;GO:0005739|mitochondrion;	GO:0044822|poly(A) RNA binding;GO:0003735|structural constituent of ribosome;	K02890	RP-L22, MRPL22, rplV; large subunit ribosomal protein L22
ENSG00000250569	3.14402	1.65261	0.0378988	up	yes	NTAN1P2	processed_pseudogene	chr8:86481754-86483002:-	gi|402907742|ref|XP_003916625.1|	PREDICTED: protein N-terminal asparagine amidohydrolase isoform X1 [Papio anubis]	gi|426360112|ref|XR_175332.1|	PREDICTED: Gorilla gorilla gorilla protein N-terminal asparagine amidohydrolase-like (LOC101148819), misc_RNA	Q64311	87	2e-138	Protein N-terminal asparagine amidohydrolase	.	.	.	.	pfam14736	N_Asn_amidohyd	Protein N-terminal asparagine amidohydrolase. This family of enzymes catalyse the deamindation of N-terminal asparagines in peptides and proteins to aspartic acid.	GO:0008344|adult locomotory behavior;GO:0007613|memory;	GO:0005737|cytoplasm;GO:0005634|nucleus;	GO:0008418|protein-N-terminal asparagine amidohydrolase activity;	K14662	NTAN1; protein N-terminal asparagine amidohydrolase [EC:3.5.1.-]
ENSG00000250790	2.64066	1.4009	0.0370127	up	yes	RP11-46H11.3	lincRNA	chr12:132911470-132914732:+	gi|355560594|gb|EHH17280.1|	hypothetical protein EGK_13646, partial [Macaca mulatta]	gi|23343648|gb|AC127070.10|	Homo sapiens 12 BAC RP11-46H11 (Roswell Park Cancer Institute Human BAC Library) complete sequence	Q6B4Z3	57.8	8e-17	Histone demethylase UTY	.	.	.	.	pfam13900	GVQW	Putative binding domain. This short domain is often found nested inside other longer domains. The function is not known, but the domain carries a highly conserved GVQW motif. The members are rich in proline and cysteine. This may be a binding domain.	GO:0010468|regulation of gene expression;	GO:0005634|nucleus;	GO:0051213|dioxygenase activity;GO:0071558|histone demethylase activity (H3-K27 specific);GO:0046872|metal ion binding;	K11447	UTX, UTY; histone demethylase [EC:1.14.11.-]
ENSG00000250920	8.70321	3.12155	0.0308532	up	yes	RP11-297P16.4	lincRNA	chr4:103550927-103559127:-	gi|717649095|gb|AIW81554.1|	embryonic stem cell related protein, partial [Homo sapiens]	gi|551853593|tpe|HG497126.1|	TPA: Homo sapiens long non-coding RNA OTTHUMT00000363302.2 (RP11-297P16.4 gene), lincRNA	Q1W209	136	6e-37	Embryonic stem cell-related gene protein	.	.	.	.	pfam13900	GVQW	Putative binding domain. This short domain is often found nested inside other longer domains. The function is not known, but the domain carries a highly conserved GVQW motif. The members are rich in proline and cysteine. This may be a binding domain.	.	GO:0005634|nucleus;	.	.	.
ENSG00000250988	1.59579	0.674273	0.0402498	up	yes	SNHG21	antisense	chr15:82750564-82757206:+	gi|119582845|gb|EAW62441.1|	hCG2036541, isoform CRA_a [Homo sapiens]	gi|571026724|ref|NR_110096.1|	Homo sapiens small nucleolar RNA host gene 21 (SNHG21), transcript variant 1, long non-coding RNA	.	.	.	.	.	.	.	.	pfam15349	DCA16	DDB1- and CUL4-associated factor 16. DCA16 is a family of eukaryotic proteins that interacts with DDB1 and CUL4A. The family may function as a substrate receptor for the CUL4-DDB1 E3 ubiquitin-protein ligase complex.	.	.	.	.	.
ENSG00000253616	2.60512	1.38135	0.0358509	up	yes	RP11-875O11.3	antisense	chr8:23071377-23074488:-	gi|685557187|ref|XP_009210971.1|	PREDICTED: LOW QUALITY PROTEIN: tumor necrosis factor receptor superfamily member 10D-like [Papio anubis]	gi|551863680|tpe|HG500968.1|	TPA: Homo sapiens long non-coding RNA OTTHUMT00000375319.1 (RP11-875O11.3 gene), antisense	.	.	.	.	.	.	.	.	pfam14722	KRAP_IP3R_bind	Ki-ras-induced actin-interacting protein-IP3R-interacting domain. This family includes the N-terminus of the actin-interacting protein sperm-specific antigen 2, or KRAP (Ki-ras-induced actin-interacting protein). This region is found to be the residues that interact with inositol 1,4,5-trisphosphate receptor (IP3R). KRAP was first localized as a membrane-bound form with extracellular regions sugg…	.	.	.	.	.
ENSG00000253910	1.91271	0.935616	0.0407819	up	yes	PCDHGB2	protein_coding	chr5:141360042-141512979:+	gi|11128035|ref|NP_061746.1|	protocadherin gamma-B2 isoform 1 precursor [Homo sapiens]	gi|14270491|ref|NM_018923.2|	Homo sapiens protocadherin gamma subfamily B, 2 (PCDHGB2), transcript variant 1, mRNA	Q9Y5G2	1581	0	Protocadherin gamma-B2	.	.	.	.	pfam08266	Cadherin_2	Cadherin-like. This cadherin domain is usually the most N-terminal copy of the domain.	GO:0007156|homophilic cell adhesion via plasma membrane adhesion molecules;	GO:0016021|integral component of membrane;GO:0005886|plasma membrane;	GO:0005509|calcium ion binding;	K16496	PCDHGB; protocadherin gamma subfamily B
ENSG00000254348	0.612895	-0.706289	0.0420653	down	yes	RP11-1134I14.4	processed_pseudogene	chr8:47189305-47189560:+	gi|119607077|gb|EAW86671.1|	hCG2040393 [Homo sapiens]	gi|195972981|gb|AC226631.3|	Homo sapiens FOSMID clone ABC10-44488900L11 from chromosome unknown, complete sequence	Q13635	72.8	1e-14	Protein patched homolog 1	.	.	.	.	pfam01534	Frizzled	Frizzled/Smoothened family membrane region. This family contains the membrane spanning region of frizzled and smoothened receptors. This membrane region is predicted to contain seven transmembrane alpha helices. Proteins related to Drosophila frizzled are receptors for Wnt (mediating the beta-catenin signalling pathway), but also the planar cell polarity (PCP) pathway and the Wnt/calcium pathway.…	GO:0009887|organ morphogenesis;GO:0007420|brain development;GO:0001658|branching involved in ureteric bud morphogenesis;GO:0061005|cell differentiation involved in kidney development;GO:0001709|cell fate determination;GO:0072203|cell proliferation involved in metanephros development;GO:0071397|cellular response to cholesterol;GO:0009953|dorsal/ventral pattern formation;GO:0030326|embryonic limb m…	GO:0044295|axonal growth cone;GO:0005901|caveola;GO:0060170|ciliary membrane;GO:0044294|dendritic growth cone;GO:0030666|endocytic vesicle membrane;GO:0016021|integral component of membrane;GO:0043231|intracellular membrane-bounded organelle;GO:0030496|midbody;GO:0048471|perinuclear region of cytoplasm;GO:0005886|plasma membrane;GO:0014069|postsynaptic density;GO:0072372|primary cilium;	GO:0015485|cholesterol binding;GO:0030332|cyclin binding;GO:0097108|hedgehog family protein binding;GO:0008158|hedgehog receptor activity;GO:0008201|heparin binding;GO:0005119|smoothened binding;	K06225	PTCH1; patched 1
ENSG00000254532	0.134259	-2.89691	0.0310553	down	yes	RP11-624D11.2	lincRNA	chr11:30044058-30084343:-	.	.	gi|551870903|tpe|HG503648.1|	TPA: Homo sapiens long non-coding RNA OTTHUMT00000388076.1 (RP11-624D11.2 gene), lincRNA	.	.	.	.	.	.	.	.	pfam14499	DUF4437	Domain of unknown function (DUF4437). This family of proteins is found in bacteria. Proteins in this family are typically between 152 and 283 amino acids in length.	.	.	.	.	.
ENSG00000255222	0.169149	-2.56363	0.0435314	down	yes	SETP17	processed_pseudogene	chr11:86294760-86295576:+	gi|567757558|ref|NP_001274666.1|	protein SETSIP [Homo sapiens]	gi|298357903|ref|NG_021827.1|	Homo sapiens SET pseudogene 17 (SETP17) on chromosome 11	P0DME0	225	3e-74	Protein SETSIP	.	.	.	.	pfam00956	NAP	Nucleosome assembly protein (NAP). NAP proteins are involved in moving histones into the nucleus, nucleosome assembly and chromatin fluidity. They affect the transcription of many genes.	GO:0045446|endothelial cell differentiation;GO:0006334|nucleosome assembly;GO:0045944|positive regulation of transcription from RNA polymerase II promoter;GO:0006351|transcription, DNA-templated;	GO:0005737|cytoplasm;GO:0005654|nucleoplasm;GO:0005634|nucleus;	GO:0003682|chromatin binding;	.	.
ENSG00000255277	0.585468	-0.772337	0.0231818	down	yes	ABCC6P2	transcribed_unprocessed_pseudogene	chr16:14820792-14824702:-	gi|767896671|ref|XP_011506849.1|	PREDICTED: multidrug resistance-associated protein 6 isoform X1 [Homo sapiens]	gi|190341053|ref|NR_023387.1|	Homo sapiens ATP-binding cassette, sub-family C, member 6 pseudogene 2 (ABCC6P2), non-coding RNA	O95255	172	6e-83	Multidrug resistance-associated protein 6	.	.	.	.	pfam11086	DUF2878	Protein of unknown function (DUF2878). This bacterial family of proteins has no known function. Some members annotate the proteins as the permease component of a Mn2+/Zn2+ transport system however this cannot be confirmed.	GO:0042493|response to drug;GO:0055085|transmembrane transport;GO:0006810|transport;GO:0007601|visual perception;	GO:0016324|apical plasma membrane;GO:0016323|basolateral plasma membrane;GO:0005789|endoplasmic reticulum membrane;GO:0016021|integral component of membrane;GO:0016328|lateral plasma membrane;GO:0005634|nucleus;GO:0005886|plasma membrane;	GO:0005524|ATP binding;GO:0042626|ATPase activity, coupled to transmembrane movement of substances;GO:0043225|anion transmembrane-transporting ATPase activity;GO:0005215|transporter activity;	K05669	ABCC6; ATP-binding cassette, subfamily C (CFTR/MRP), member 6
ENSG00000257346	0.318525	-1.65052	0.0457246	down	yes	RP11-386G11.8	antisense	chr12:49090208-49093312:+	gi|189066613|dbj|BAG36160.1|	unnamed protein product [Homo sapiens]	gi|551874010|tpe|HG504729.1|	TPA: Homo sapiens long non-coding RNA OTTHUMT00000408974.1 (RP11-386G11.8 gene), antisense	O43323	179	4e-52	Desert hedgehog protein	.	.	.	.	pfam01079	Hint	Hint module. This is an alignment of the Hint module in the Hedgehog proteins. It does not include any Inteins which also possess the Hint module.	GO:0007267|cell-cell signaling;GO:0033327|Leydig cell differentiation;GO:0030238|male sex determination;GO:0042552|myelination;GO:0050810|regulation of steroid biosynthetic process;GO:0032355|response to estradiol;GO:0043627|response to estrogen;GO:0007286|spermatid development;	GO:0005615|extracellular space;GO:0005886|plasma membrane;	GO:0005509|calcium ion binding;GO:0008233|peptidase activity;GO:0008270|zinc ion binding;	K11990	DHH; desert hedgehog
ENSG00000257489	0.584283	-0.775261	0.0169134	down	yes	RP11-175P13.3	transcribed_unprocessed_pseudogene	chr12:100173196-100199783:-	gi|685574514|ref|XP_009179768.1|	PREDICTED: TBC1 domain family member 2B-like [Papio anubis]	gi|27877127|gb|AC010203.14|	Homo sapiens 12 BAC RP11-175P13 (Roswell Park Cancer Institute Human BAC Library) complete sequence	Q3U0J8	107	7e-26	TBC1 domain family member 2B	.	.	.	.	pfam13900	GVQW	Putative binding domain. This short domain is often found nested inside other longer domains. The function is not known, but the domain carries a highly conserved GVQW motif. The members are rich in proline and cysteine. This may be a binding domain.	GO:0090630|activation of GTPase activity;GO:0006886|intracellular protein transport;GO:0031338|regulation of vesicle fusion;	GO:0012505|endomembrane system;GO:0005622|intracellular;	GO:0005096|GTPase activator activity;GO:0017137|Rab GTPase binding;	.	.
ENSG00000257511	0.645045	-0.632529	0.00410522	down	yes	RP11-278C7.1	processed_pseudogene	chr12:32726383-32727387:-	gi|594695698|ref|XP_007195056.1|	PREDICTED: nucleosome assembly protein 1-like 1 isoform X1 [Balaenoptera acutorostrata scammoni]	gi|238018119|ref|NG_012219.1|	Homo sapiens dynamin 1-like (DNM1L), RefSeqGene on chromosome 12	A6H767	365	1e-122	Nucleosome assembly protein 1-like 1	.	.	.	.	pfam00956	NAP	Nucleosome assembly protein (NAP). NAP proteins are involved in moving histones into the nucleus, nucleosome assembly and chromatin fluidity. They affect the transcription of many genes.	GO:0006334|nucleosome assembly;	GO:0042470|melanosome;GO:0005634|nucleus;	.	K11279	NAP1L1, NRP; nucleosome assembly protein 1-like 1
ENSG00000257743	0.508634	-0.975301	7.98094e-08	down	yes	MGAM2	protein_coding	chr7:142111749-142222324:+	gi|651164871|ref|NP_001280555.1|	putative maltase-glucoamylase-like protein FLJ16351 [Homo sapiens]	gi|544423314|ref|XM_005550999.1|	PREDICTED: Macaca fascicularis maltase-glucoamylase (alpha-glucosidase) (MGAM), transcript variant X1, mRNA	Q2M2H8	196	3e-49	Probable maltase-glucoamylase 2	SPAPB24D3.10c	178	8e-47	COG1501	pfam01055	Glyco_hydro_31	Glycosyl hydrolases family 31. Glycosyl hydrolases are key enzymes of carbohydrate metabolizm. Family 31 comprises of enzymes that are, or similar to, alpha- galactosidases.	GO:0005975|carbohydrate metabolic process;	GO:0016021|integral component of membrane;	GO:0030246|carbohydrate binding;GO:0004339|glucan 1,4-alpha-glucosidase activity;	K12047	MGAM; maltase-glucoamylase [EC:3.2.1.20 3.2.1.3]
ENSG00000257905	0.148568	-2.7508	0.0344471	down	yes	RP3-432I18.1	processed_pseudogene	chr12:47593208-47593440:+	gi|658876821|ref|XP_008421423.1|	PREDICTED: polyubiquitin-like isoform X1 [Poecilia reticulata]	gi|95147499|gb|AC183964.3|	Pan troglodytes BAC clone CH251-654L7 from chromosome 12, complete sequence	P62975	86.3	5e-22	Ubiquitin	ECU02g0740i	85.1	5e-22	COG5272	pfam00240	ubiquitin	Ubiquitin family. This family contains a number of ubiquitin-like proteins: SUMO (smt3 homologue) Nedd8, Elongin B, Rub1, and Parkin. A number of them are thought to carry a distinctive five-residue motif termed the proteasome-interacting motif (PIM), which may have a biologically significant role in protein delivery to proteasomes and recruitment of proteasomes to transcription sites.	.	GO:0005737|cytoplasm;GO:0005634|nucleus;	.	.	.
ENSG00000258439	10.6848	3.41749	0.00839558	up	yes	RP11-173A8.2	processed_pseudogene	chr14:74658049-74658590:+	gi|554586956|ref|XP_005884889.1|	PREDICTED: 40S ribosomal protein S2-like [Myotis brandtii]	gi|589908559|ref|NG_027390.2|	Homo sapiens ribosomal protein S2 pseudogene (LOC100419503) on chromosome 14	Q90YS3	72	3e-14	40S ribosomal protein S2	.	.	.	.	pfam03719	Ribosomal_S5_C	Ribosomal protein S5, C-terminal domain.	GO:0006412|translation;	GO:0015935|small ribosomal subunit;	GO:0003723|RNA binding;GO:0003735|structural constituent of ribosome;	.	.
ENSG00000258670	0.191156	-2.38718	0.0385427	down	yes	RP11-1042B17.3	antisense	chr14:60515119-60554916:+	gi|440909262|gb|ELR59187.1|	hypothetical protein M91_00785, partial [Bos mutus]	gi|551877519|tpe|HG506282.1|	TPA: Homo sapiens long non-coding RNA OTTHUMT00000412194.1 (RP11-1042B17.3 gene), antisense	O00370	103	6e-23	LINE-1 retrotransposable element ORF2 protein	.	.	.	.	pfam09773	Meckelin	Meckelin (Transmembrane protein 67). Members of this family are thought to be related to the ciliary basal body. Defects result in Meckel syndrome type 3, an autosomal recessive disorder characterized by a combination of renal cysts and variably associated features including developmental anomalies of the central nervous system (typically encephalocele), hepatic ductal dysplasia and cysts, and po…	GO:0006310|DNA recombination;GO:0090305|nucleic acid phosphodiester bond hydrolysis;GO:0032199|reverse transcription involved in RNA-mediated transposition;GO:0032197|transposition, RNA-mediated;	.	GO:0046872|metal ion binding;GO:0003964|RNA-directed DNA polymerase activity;GO:0009036|Type II site-specific deoxyribonuclease activity;	.	.
ENSG00000258884	0.575474	-0.797177	0.0015652	down	yes	CTD-3035D6.2	lincRNA	chr14:90822365-90828128:-	gi|10437752|dbj|BAB15100.1|	unnamed protein product [Homo sapiens]	gi|551878546|tpe|HG506487.1|	TPA: Homo sapiens long non-coding RNA OTTHUMT00000411417.1 (CTD-3035D6.2 gene), lincRNA	P51957	56.2	2e-08	Serine/threonine-protein kinase Nek4	.	.	.	.	pfam13900	GVQW	Putative binding domain. This short domain is often found nested inside other longer domains. The function is not known, but the domain carries a highly conserved GVQW motif. The members are rich in proline and cysteine. This may be a binding domain.	GO:0051301|cell division;GO:0006974|cellular response to DNA damage stimulus;GO:0000278|mitotic cell cycle;GO:0007067|mitotic nuclear division;GO:0045893|positive regulation of transcription, DNA-templated;GO:0006468|protein phosphorylation;GO:2000772|regulation of cellular senescence;GO:1900062|regulation of replicative cell aging;GO:2001020|regulation of response to DNA damage stimulus;	GO:0005929|cilium;GO:0005737|cytoplasm;	GO:0005524|ATP binding;GO:0030145|manganese ion binding;GO:0004674|protein serine/threonine kinase activity;GO:0004702|receptor signaling protein serine/threonine kinase activity;	K08857	NEK; NIMA (never in mitosis gene a)-related kinase [EC:2.7.11.1]
ENSG00000259017	0.368718	-1.43941	0.0462646	down	yes	RP11-561B11.6	lincRNA	chr14:35447003-35447625:-	gi|332843270|ref|XP_003314600.1|	PREDICTED: uncharacterized protein LOC100611144 isoform X2 [Pan troglodytes]	gi|551877719|tpe|HG506097.1|	TPA: Homo sapiens long non-coding RNA OTTHUMT00000411500.1 (RP11-561B11.6 gene), lincRNA	Q6W349	53.9	8e-09	Putative uncharacterized protein encoded by LINC00575	.	.	.	.	pfam13900	GVQW	Putative binding domain. This short domain is often found nested inside other longer domains. The function is not known, but the domain carries a highly conserved GVQW motif. The members are rich in proline and cysteine. This may be a binding domain.	.	.	.	.	.
ENSG00000259146	0.421029	-1.24801	0.0139673	down	yes	RP1-261D10.2	antisense	chr14:71292729-71321814:-	gi|119601463|gb|EAW81057.1|	hCG2040454, partial [Homo sapiens]	gi|551877565|tpe|HG506354.1|	TPA: Homo sapiens long non-coding RNA OTTHUMT00000413051.1 (RP1-261D10.2 gene), antisense	Q8IUI4	47.8	8e-06	Putative protein SNX29P2	.	.	.	.	pfam13900	GVQW	Putative binding domain. This short domain is often found nested inside other longer domains. The function is not known, but the domain carries a highly conserved GVQW motif. The members are rich in proline and cysteine. This may be a binding domain.	.	.	.	.	.
ENSG00000259236	0.398894	-1.32592	0.0387859	down	yes	GOLGA8VP	unprocessed_pseudogene	chr15:101771758-101781989:-	gi|675676526|ref|XP_008960223.1|	PREDICTED: LOW QUALITY PROTEIN: golgin subfamily A member 8H-like, partial [Pan paniscus]	gi|225703131|ref|NM_001023567.4|	Homo sapiens golgin A8 family, member B (GOLGA8B), transcript variant 1, mRNA	A6NN73	76.3	3e-13	Golgin subfamily A member 8C	.	.	.	.	pfam15070	GOLGA2L5	Putative golgin subfamily A member 2-like protein 5. The function of the GOLGA2L5 protein family remains unknown. This family of proteins is thought to be found in the Golgi apparatus of eukaryotes. Proteins in this family are typically between and 840 amino acids in length.	.	GO:0005794|Golgi apparatus;	.	.	.
ENSG00000259298	0.323558	-1.6279	0.0204223	down	yes	RP11-562A8.4	antisense	chr15:50497195-50498744:-	gi|826307432|ref|XP_012504607.1|	PREDICTED: ubiquitin carboxyl-terminal hydrolase 8 [Propithecus coquereli]	gi|551878936|tpe|HG507019.1|	TPA: Homo sapiens long non-coding RNA OTTHUMT00000418600.1 (RP11-562A8.4 gene), antisense	P40818	94.7	2e-20	Ubiquitin carboxyl-terminal hydrolase 8	.	.	.	.	pfam00443	UCH	Ubiquitin carboxyl-terminal hydrolase.	GO:0008283|cell proliferation;GO:0007032|endosome organization;GO:0038128|ERBB2 signaling pathway;GO:0000281|mitotic cytokinesis;GO:0016579|protein deubiquitination;GO:0071108|protein K48-linked deubiquitination;GO:0070536|protein K63-linked deubiquitination;GO:0006511|ubiquitin-dependent protein catabolic process;	GO:0005913|cell-cell adherens junction;GO:0005737|cytoplasm;GO:0005829|cytosol;GO:0005769|early endosome;GO:0031313|extrinsic component of endosome membrane;GO:0019897|extrinsic component of plasma membrane;GO:0005794|Golgi apparatus;GO:0030496|midbody;GO:0005654|nucleoplasm;	GO:0098641|cadherin binding involved in cell-cell adhesion;GO:0004197|cysteine-type endopeptidase activity;GO:0004843|ubiquitin-specific protease activity;	K11839	USP8, UBP5; ubiquitin carboxyl-terminal hydrolase 8 [EC:3.4.19.12]
ENSG00000259321	2.26557	1.17987	0.0410946	up	yes	RP11-468E2.5	lincRNA	chr14:24139445-24140444:+	gi|821030474|ref|XP_012353467.1|	PREDICTED: ER membrane protein complex subunit 9 isoform X1 [Nomascus leucogenys]	gi|551876346|tpe|HG506031.1|	TPA: Homo sapiens long non-coding RNA OTTHUMT00000416167.1 (RP11-468E2.5 gene), lincRNA	Q96CB5	37	2e-06	Putative uncharacterized protein C8orf44	.	.	.	.	pfam13900	GVQW	Putative binding domain. This short domain is often found nested inside other longer domains. The function is not known, but the domain carries a highly conserved GVQW motif. The members are rich in proline and cysteine. This may be a binding domain.	.	GO:0005654|nucleoplasm;	.	.	.
ENSG00000259426	0.599098	-0.739137	0.00280787	down	yes	RP11-253M7.1	antisense	chr15:69396904-69415029:-	gi|119598246|gb|EAW77840.1|	hCG2045338 [Homo sapiens]	gi|551880873|tpe|HG507171.1|	TPA: Homo sapiens long non-coding RNA OTTHUMT00000416786.1 (RP11-253M7.1 gene), antisense	Q9NXK6	70.5	8e-12	Membrane progestin receptor gamma	.	.	.	.	pfam15483	DUF4641	Domain of unknown function (DUF4641). This family of proteins is found in eukaryotes. Proteins in this family are typically between 201 and 519 amino acids in length.	GO:0007275|multicellular organismal development;GO:0048477|oogenesis;GO:0048545|response to steroid hormone;	GO:0016021|integral component of membrane;GO:0005886|plasma membrane;	GO:0005496|steroid binding;GO:0003707|steroid hormone receptor activity;	.	.
ENSG00000259583	0.623589	-0.681332	0.0395124	down	yes	RP11-66B24.4	antisense	chr15:100892859-100919283:-	gi|767896488|ref|XP_011506835.1|	PREDICTED: E3 ubiquitin-protein ligase RING1-like isoform X1 [Homo sapiens]	gi|551881083|tpe|HG507543.1|	TPA: Homo sapiens long non-coding RNA OTTHUMT00000416701.1 (RP11-66B24.4 gene), antisense	P47895	96.3	4e-19	Aldehyde dehydrogenase family 1 member A3	BH0539	72.4	4e-12	COG1012	pfam13900	GVQW	Putative binding domain. This short domain is often found nested inside other longer domains. The function is not known, but the domain carries a highly conserved GVQW motif. The members are rich in proline and cysteine. This may be a binding domain.	GO:0048048|embryonic eye morphogenesis;GO:0060324|face development;GO:0042472|inner ear morphogenesis;GO:0007626|locomotory behavior;GO:0050885|neuromuscular process controlling balance;GO:0021768|nucleus accumbens development;GO:0060166|olfactory pit development;GO:0002072|optic cup morphogenesis involved in camera-type eye development;GO:0043065|positive regulation of apoptotic process;GO:00425…	GO:0005737|cytoplasm;GO:0005829|cytosol;GO:0070062|extracellular exosome;	GO:0004029|aldehyde dehydrogenase (NAD) activity;GO:0004030|aldehyde dehydrogenase [NAD(P)+] activity;GO:0070403|NAD+ binding;GO:0042803|protein homodimerization activity;GO:0001758|retinal dehydrogenase activity;GO:0070324|thyroid hormone binding;	K00129	E1.2.1.5; aldehyde dehydrogenase (NAD(P)+) [EC:1.2.1.5]
ENSG00000259605	0.547813	-0.868246	0.0118817	down	yes	AC074212.5	processed_transcript	chr19:45764785-45769806:+	gi|297277382|ref|XP_002801357.1|	PREDICTED: hypothetical protein LOC100428582 [Macaca mulatta]	gi|256221146|ref|NG_012745.1|	Homo sapiens SIX homeobox 5 (SIX5), RefSeqGene on chromosome 19	Q8N196	167	2e-43	Homeobox protein SIX5	.	.	.	.	pfam13429	TPR_15	Tetratricopeptide repeat.	GO:0002088|lens development in camera-type eye;GO:1902723|negative regulation of skeletal muscle satellite cell proliferation;GO:0045892|negative regulation of transcription, DNA-templated;GO:0045944|positive regulation of transcription from RNA polymerase II promoter;GO:0007286|spermatid development;GO:0006351|transcription, DNA-templated;	GO:0005737|cytoplasm;GO:0005794|Golgi apparatus;GO:0043231|intracellular membrane-bounded organelle;GO:0005654|nucleoplasm;	GO:0000978|RNA polymerase II core promoter proximal region sequence-specific DNA binding;	K19474	SIX5; homeobox protein SIX5
ENSG00000260314	0.57482	-0.798817	0.00270916	down	yes	MRC1	protein_coding	chr10:17809344-17911170:+	gi|4505245|ref|NP_002429.1|	macrophage mannose receptor 1 precursor [Homo sapiens]	gi|471270251|ref|NM_002438.3|	Homo sapiens mannose receptor, C type 1 (MRC1), mRNA	P22897	2912	0	Macrophage mannose receptor 1	.	.	.	.	pfam00059	Lectin_C	Lectin C-type domain. This family includes both long and short form C-type	GO:0071346|cellular response to interferon-gamma;GO:0071353|cellular response to interleukin-4;GO:0071222|cellular response to lipopolysaccharide;GO:0006898|receptor-mediated endocytosis;	GO:0009986|cell surface;GO:0010008|endosome membrane;GO:0005887|integral component of plasma membrane;GO:0005886|plasma membrane;	GO:0005537|mannose binding;GO:0004872|receptor activity;GO:0004888|transmembrane signaling receptor activity;GO:0001618|virus receptor activity;	K06560	MRC; mannose receptor, C type
ENSG00000260423	0.633634	-0.658279	0.0384759	down	yes	RP13-735L24.1	lincRNA	chr12:9367464-9397617:+	gi|119608981|gb|EAW88575.1|	hCG2045490 [Homo sapiens]	gi|635574632|ref|NR_120479.1|	Homo sapiens uncharacterized LOC101930452 (LOC101930452), long non-coding RNA	.	.	.	.	.	.	.	.	pfam01900	RNase_P_Rpp14	Rpp14/Pop5 family. tRNA processing enzyme ribonuclease P (RNase P) consists of an RNA molecule associated with at least eight protein subunits, hPop1, Rpp14, Rpp20, Rpp25, Rpp29, Rpp30, Rpp38, and Rpp40. This protein is known as Pop5 in eukaryotes.	.	.	.	.	.
ENSG00000260456	0.66595	-0.586514	0.03181	down	yes	C16orf95	protein_coding	chr16:87083562-87317420:-	gi|304376255|ref|NP_001182053.1|	uncharacterized protein C16orf95 isoform 1 [Homo sapiens]	gi|34531953|dbj|AK125749.1|	Homo sapiens cDNA FLJ43761 fis, clone TESTI2048109	Q8N2A0	65.5	1e-13	Putative uncharacterized protein encoded by LINC00269	.	.	.	.	pfam15132	DUF4568	Domain of unknown function (DUF4568). This family of proteins is functionally uncharacterized. This family of proteins is found in eukaryotes.	.	.	.	.	.
ENSG00000260500	0.250656	-1.99622	0.0407588	down	yes	CTD-3193O13.1	antisense	chr19:7918652-7919157:-	gi|297275999|ref|XP_002801100.1|	PREDICTED: hypothetical protein LOC100428514 [Macaca mulatta]	gi|551888296|tpe|HG510318.1|	TPA: Homo sapiens long non-coding RNA OTTHUMT00000430897.1 (CTD-3193O13.1 gene), antisense	.	.	.	.	.	.	.	.	pfam09502	HrpB4	Bacterial type III secretion protein (HrpB4). This entry represents proteins encoded by genes which are found in type III secretion operons in a narrow range of species including Xanthomonas, Burkholderia and Ralstonia.	.	.	.	.	.
ENSG00000260757	1.51234	0.59678	0.0469433	up	yes	RP11-120K18.2	sense_overlapping	chr16:31402565-31404699:+	gi|21756834|dbj|BAC04967.1|	unnamed protein product [Homo sapiens]	gi|551882277|tpe|HG507951.1|	TPA: Homo sapiens long non-coding RNA OTTHUMT00000432840.1 (RP11-120K18.2 gene), sense_overlapping	Q13349	100	2e-20	Integrin alpha-D	.	.	.	.	pfam13900	GVQW	Putative binding domain. This short domain is often found nested inside other longer domains. The function is not known, but the domain carries a highly conserved GVQW motif. The members are rich in proline and cysteine. This may be a binding domain.	GO:0030198|extracellular matrix organization;GO:0034113|heterotypic cell-cell adhesion;GO:0006955|immune response;GO:0007229|integrin-mediated signaling pathway;	GO:0009986|cell surface;GO:0008305|integrin complex;GO:0005886|plasma membrane;	GO:0046872|metal ion binding;	K06594	ITGAD; integrin alpha D
ENSG00000260874	2.0133	1.00956	0.0228034	up	yes	RP11-715J22.4	lincRNA	chr16:2456252-2459979:-	gi|67971640|dbj|BAE02162.1|	unnamed protein product [Macaca fascicularis]	gi|551881780|tpe|HG507620.1|	TPA: Homo sapiens long non-coding RNA OTTHUMT00000435101.2 (RP11-715J22.4 gene), lincRNA	P41002	61.6	6e-10	Cyclin-F	.	.	.	.	pfam02711	Pap_E4	E4 protein. This is is a family of Papillomavirus proteins, E4, coded for by ORF4. A splice variant, E1--E4, exists but neither the function of E4 or E1--E4 is known.	GO:0051301|cell division;GO:0007067|mitotic nuclear division;GO:0010826|negative regulation of centrosome duplication;GO:0001890|placenta development;GO:0016567|protein ubiquitination;GO:0000320|re-entry into mitotic cell cycle;GO:0031146|SCF-dependent proteasomal ubiquitin-dependent protein catabolic process;	GO:0005814|centriole;GO:0005634|nucleus;GO:0019005|SCF ubiquitin ligase complex;	.	K10289	CCNF, FBXO1; F-box protein 1 (cyclin F)
ENSG00000260911	0.376356	-1.40983	0.0413868	down	yes	RP11-196G11.2	lincRNA	chr16:31043150-31049868:+	gi|194379866|dbj|BAG58285.1|	unnamed protein product [Homo sapiens]	gi|544516603|ref|XR_286908.1|	PREDICTED: Macaca fascicularis uncharacterized LOC102135654 (LOC102135654), misc_RNA	Q9P1C3	54.3	2e-09	Putative uncharacterized protein PRO2829	.	.	.	.	pfam13900	GVQW	Putative binding domain. This short domain is often found nested inside other longer domains. The function is not known, but the domain carries a highly conserved GVQW motif. The members are rich in proline and cysteine. This may be a binding domain.	.	GO:0005576|extracellular region;	.	.	.
ENSG00000261037	0.507957	-0.977221	0.0456677	down	yes	CTC-471C19.1	lincRNA	chr5:6019029-6022283:-	.	.	gi|551855293|tpe|HG497707.1|	TPA: Homo sapiens long non-coding RNA OTTHUMT00000423121.1 (CTC-471C19.1 gene), lincRNA	.	.	.	.	.	.	.	.	pfam04647	AgrB	Accessory gene regulator B. The arg locus consists of two transcripts: RNAII and RNAIII. RNAII encodes four genes (agrA, B, C, and D) whose gene products assemble a quorum sensing system. AgrB and AgrD are essential for the production of the autoinducing peptide which functions as a signal for quorum sensing. AgrB is a transmembrane protein.	.	.	.	.	.
ENSG00000261159	0.643527	-0.635927	0.00144759	down	yes	RP11-723O4.9	lincRNA	chr3:128859716-128860526:-	gi|119599707|gb|EAW79301.1|	hCG1820791 [Homo sapiens]	gi|551850658|tpe|HG496040.1|	TPA: Homo sapiens long non-coding RNA OTTHUMT00000431061.1 (RP11-723O4.9 gene), lincRNA	.	.	.	.	.	.	.	.	pfam12714	TILa	TILa domain. This cysteine rich domain occurs along side the TIL pfam01826 domain and is likely to be a distantly related relative.	.	.	.	.	.
ENSG00000261438	0.131544	-2.92638	0.0325934	down	yes	RP11-399O19.9	sense_overlapping	chr10:89015836-89017059:+	gi|634822597|ref|XP_007936241.1|	PREDICTED: G-protein coupled receptor 39 [Orycteropus afer afer]	gi|551869643|tpe|HG503127.1|	TPA: Homo sapiens long non-coding RNA OTTHUMT00000473186.1 (RP11-399O19.9 gene), sense_overlapping	B2ZHY2	53.9	9e-11	G-protein coupled receptor 39	.	.	.	.	pfam11496	HDA2-3	Class II histone deacetylase complex subunits 2 and 3. This family of class II histone deacetylase complex subunits HDA2 and HDA3 is found in fungi, The member from S. pombe is referred to as Ccq1. These proteins associate with HDA1 to generate the activity of the HDA1 histone deacetylase complex. HDA1 interacts with itself and with the HDA2-HDA3 subcomplex to form a probable tetramer and these i…	.	GO:0016021|integral component of membrane;GO:0005886|plasma membrane;	GO:0004930|G-protein coupled receptor activity;GO:0046872|metal ion binding;	K08412	GPR39; G protein-coupled receptor 39
ENSG00000261476	0.226958	-2.13951	0.0497146	down	yes	RP11-77K12.3	sense_intronic	chr16:75458252-75460017:-	.	.	gi|551883163|tpe|HG508293.1|	TPA: Homo sapiens long non-coding RNA OTTHUMT00000435197.1 (RP11-77K12.3 gene), sense_intronic	.	.	.	.	.	.	.	.	pfam13900	GVQW	Putative binding domain. This short domain is often found nested inside other longer domains. The function is not known, but the domain carries a highly conserved GVQW motif. The members are rich in proline and cysteine. This may be a binding domain.	.	.	.	.	.
ENSG00000261485	0.580435	-0.784795	0.00243892	down	yes	PAN3-AS1	antisense	chr13:28136843-28138193:-	gi|426375055|ref|XP_004054365.1|	PREDICTED: uncharacterized protein LOC101136455 [Gorilla gorilla gorilla]	gi|551875220|tpe|HG505483.1|	TPA: Homo sapiens long non-coding RNA OTTHUMT00000431330.1 (RP11-179F17.5 gene), antisense	.	.	.	.	.	.	.	.	pfam10325	7TM_GPCR_Srz	Serpentine type 7TM GPCR chemoreceptor Srz. Chemoreception is mediated in Caenorhabditis elegans by members of the seven-transmembrane G-protein-coupled receptor class (7TM GPCRs) of proteins which are of the serpentine type. Srz is a solo families amongst the superfamilies of chemoreceptors. Chemoperception is one of the central senses of soil nematodes like C. elegans which are otherwise 'blind…	.	.	.	.	.
ENSG00000261587	0.57891	-0.788589	0.0327483	down	yes	TMEM249	protein_coding	chr8:144352219-144354914:-	gi|357394956|ref|NP_001239331.1|	transmembrane protein 249 isoform 1 [Homo sapiens]	gi|34367619|emb|BX648457.1|	Homo sapiens mRNA; cDNA DKFZp686A13273 (from clone DKFZp686A13273)	Q2WGJ8	405	4e-141	Transmembrane protein 249	.	.	.	.	pfam15158	DUF4579	Domain of unknown function (DUF4579). This family of proteins is found in eukaryotes. Proteins in this family are typically between 192 and 239 amino acids in length. The human member of this family is C8orfK29.	.	GO:0016021|integral component of membrane;	.	.	.
ENSG00000261716	0.544113	-0.878023	3.4601e-20	down	yes	RP11-196G18.22	sense_overlapping	chr1:149844498-149849024:-	gi|11493483|gb|AAG35515.1|AF130117_48	PRO2550 [Homo sapiens]	gi|551898159|tpe|HG492742.1|	TPA: Homo sapiens long non-coding RNA OTTHUMT00000431487.2 (RP11-196G18.22 gene), sense_overlapping	Q8N7I0	105	2e-23	Protein GVQW1	.	.	.	.	pfam13900	GVQW	Putative binding domain. This short domain is often found nested inside other longer domains. The function is not known, but the domain carries a highly conserved GVQW motif. The members are rich in proline and cysteine. This may be a binding domain.	.	.	.	.	.
ENSG00000261924	0.633727	-0.658066	0.0235198	down	yes	CTD-2561B21.5	antisense	chr17:80966239-80971213:-	gi|34535042|dbj|BAC87191.1|	unnamed protein product [Homo sapiens]	gi|551885228|tpe|HG509530.1|	TPA: Homo sapiens long non-coding RNA OTTHUMT00000438212.1 (CTD-2561B21.5 gene), antisense	Q8N2A0	122	1e-29	Putative uncharacterized protein encoded by LINC00269	.	.	.	.	pfam13900	GVQW	Putative binding domain. This short domain is often found nested inside other longer domains. The function is not known, but the domain carries a highly conserved GVQW motif. The members are rich in proline and cysteine. This may be a binding domain.	.	.	.	.	.
ENSG00000261934	2.57284	1.36336	0.0321736	up	yes	PCDHGA9	protein_coding	chr5:141402932-141512979:+	gi|11128043|ref|NP_061744.1|	protocadherin gamma-A9 isoform 1 precursor [Homo sapiens]	gi|14270485|ref|NM_018921.2|	Homo sapiens protocadherin gamma subfamily A, 9 (PCDHGA9), transcript variant 1, mRNA	Q9Y5G4	1549	0	Protocadherin gamma-A9	.	.	.	.	pfam08266	Cadherin_2	Cadherin-like. This cadherin domain is usually the most N-terminal copy of the domain.	GO:0007156|homophilic cell adhesion via plasma membrane adhesion molecules;	GO:0016021|integral component of membrane;GO:0005886|plasma membrane;	GO:0005509|calcium ion binding;GO:0044822|poly(A) RNA binding;	K16495	PCDHGA; protocadherin gamma subfamily A
ENSG00000261996	0.648722	-0.624328	0.0374098	down	yes	CTC-281F24.1	lincRNA	chr17:6653464-6655009:-	gi|795240591|ref|XP_011909494.1|	PREDICTED: uncharacterized protein LOC105582960 [Cercocebus atys]	gi|551884013|tpe|HG508621.1|	TPA: Homo sapiens long non-coding RNA OTTHUMT00000439308.1 (CTC-281F24.1 gene), lincRNA	.	.	.	.	.	.	.	.	pfam06057	VirJ	Bacterial virulence protein (VirJ). This family consists of several bacterial VirJ virulence proteins. VirJ is thought to be involved in the type IV secretion system. It is thought that the substrate proteins localized to the periplasm may associate with the pilus in a manner that is mediated by VirJ, and suggest a two-step process for type IV secretion in Agrobacterium.	.	.	.	.	.
ENSG00000262434	0.429015	-1.2209	0.00260309	down	yes	RP11-676J12.8	antisense	chr17:789744-790525:-	.	.	gi|551883315|tpe|HG508535.1|	TPA: Homo sapiens long non-coding RNA OTTHUMT00000437243.1 (RP11-676J12.8 gene), antisense	.	.	.	.	.	.	.	.	pfam11959	DUF3473	Domain of unknown function (DUF3473). This presumed domain is functionally uncharacterized. This domain is found in bacteria and archaea. This domain is about 130 amino acids in length. This domain is found associated with pfam01522. This domain has two completely conserved residues (P and H) that may be functionally important.	.	.	.	.	.
ENSG00000262874	0.245201	-2.02796	0.0448038	down	yes	C19orf84	protein_coding	chr19:51388289-51390574:-	gi|302318916|ref|NP_001180552.1|	uncharacterized protein C19orf84 [Homo sapiens]	gi|302318915|ref|NM_001193623.1|	Homo sapiens chromosome 19 open reading frame 84 (C19orf84), transcript variant 1, mRNA	I3L1E1	181	1e-52	Uncharacterized protein C19orf84	.	.	.	.	pfam15449	Retinal	Retinal protein. This family of proteins is found in the photoreceptor cells of the retina. Mutations of the gene encoding this protein have been associated with retinal disorders such as retinitis pigmentosa and late-onset progressive retinal atrophy. The function of this family of proteins is unknown, but it is likely to be important in the development and function of the retina.	.	.	.	.	.
ENSG00000262943	0.349442	-1.51688	0.043421	down	yes	ALOX12P2	transcribed_unprocessed_pseudogene	chr17:6853861-6954107:+	gi|426383841|ref|XP_004058485.1|	PREDICTED: LOW QUALITY PROTEIN: arachidonate 12-lipoxygenase, epidermal-type-like [Gorilla gorilla gorilla]	gi|21733350|emb|AL832768.1|	Homo sapiens mRNA; cDNA DKFZp686C1432 (from clone DKFZp686C1432)	D3ZQF9	80.9	3e-16	Arachidonate 12-lipoxygenase, epidermal-type	.	.	.	.	pfam00305	Lipoxygenase	Lipoxygenase.	GO:0019369|arachidonic acid metabolic process;GO:0019372|lipoxygenase pathway;	GO:0005737|cytoplasm;	GO:0004052|arachidonate 12-lipoxygenase activity;GO:0005506|iron ion binding;	K00458	ALOX12; arachidonate 12-lipoxygenase [EC:1.13.11.31]
ENSG00000263567	1.64438	0.717546	0.0215203	up	yes	RP11-805L22.3	lincRNA	chr17:31762440-31769048:+	gi|119584862|gb|EAW64458.1|	hCG2038441, partial [Homo sapiens]	gi|551883839|tpe|HG508918.1|	TPA: Homo sapiens long non-coding RNA OTTHUMT00000445590.1 (RP11-805L22.3 gene), lincRNA	.	.	.	.	.	.	.	.	pfam02667	SCFA_trans	Short chain fatty acid transporter. This family consists of two sequences annotated as short chain fatty acid transporters, however, there are no references giving details of experimental characterisation of this function.	.	.	.	.	.
ENSG00000263745	3.67989	1.87966	0.0428958	up	yes	RP11-161I6.2	lincRNA	chr18:1883524-2240847:-	gi|119622107|gb|EAX01702.1|	hCG2039879, partial [Homo sapiens]	gi|551887355|tpe|HG509643.1|	TPA: Homo sapiens long non-coding RNA OTTHUMT00000441770.1 (RP11-161I6.2 gene), lincRNA	.	.	.	.	.	.	.	.	pfam04916	Phospholip_B	Phospholipase B. Phospholipase B (PLB) catalyses the hydrolytic cleavage of both acylester bonds of glycerophospholipids. This family of PLB enzymes has been identified in mammals, flies and nematodes but not in yeast. In Drosophila this protein was named LAMA for laminin ancestor since it is expressed in the neuronal and glial precursors that surround the lamina.	.	.	.	.	.
ENSG00000263818	2.40353	1.26515	0.0449284	up	yes	CTD-2206N4.4	transcribed_processed_pseudogene	chr17:39057019-39113190:+	gi|34529963|dbj|BAC85811.1|	unnamed protein product [Homo sapiens]	gi|304307766|ref|NR_036551.1|	Homo sapiens RAD52 motif containing 1 pseudogene (LOC100131347), non-coding RNA	Q05481	64.3	3e-09	Zinc finger protein 91	.	.	.	.	pfam13900	GVQW	Putative binding domain. This short domain is often found nested inside other longer domains. The function is not known, but the domain carries a highly conserved GVQW motif. The members are rich in proline and cysteine. This may be a binding domain.	GO:0045892|negative regulation of transcription, DNA-templated;GO:0070895|negative regulation of transposon integration;GO:0006351|transcription, DNA-templated;	GO:0005634|nucleus;	GO:0003677|DNA binding;GO:0003700|transcription factor activity, sequence-specific DNA binding;GO:0008270|zinc ion binding;	K09228	KRAB; KRAB domain-containing zinc finger protein
ENSG00000263860	0.224736	-2.1537	0.026309	down	yes	RP11-218M11.3	lincRNA	chr17:30550493-30551189:-	gi|119571621|gb|EAW51236.1|	hCG2042020, partial [Homo sapiens]	gi|551884249|tpe|HG508901.1|	TPA: Homo sapiens long non-coding RNA OTTHUMT00000443629.1 (RP11-218M11.3 gene), lincRNA	.	.	.	.	.	.	.	.	pfam14650	FAM75	FAM75 family.	.	.	.	.	.
ENSG00000264049	2.35834	1.23777	0.0415059	up	yes	MIR4737	miRNA	chr17:60043025-60043105:-	.	.	gi|385137166|gb|AC245758.3|	Homo sapiens BAC clone CH17-415B15 from chromosome 17, complete sequence	.	.	.	.	.	.	.	.	pfam02199	SapA	Saposin A-type domain.	.	.	.	.	.
ENSG00000264057	0.371181	-1.42981	0.00393743	down	yes	RP11-583F2.1	transcribed_unprocessed_pseudogene	chr17:64927634-64934203:+	gi|30046988|gb|AAH50566.1|	BPTF protein, partial [Homo sapiens]	gi|530411793|ref|XM_005257160.1|	PREDICTED: Homo sapiens bromodomain PHD finger transcription factor (BPTF), transcript variant X15, mRNA	Q12830	64.7	9e-11	Nucleosome-remodeling factor subunit BPTF	.	.	.	.	pfam00628	PHD	PHD-finger. PHD folds into an interleaved type of Zn-finger chelating 2 Zn ions in a similar manner to that of the RING and FYVE domains. Several PHD fingers have been identified as binding modules of methylated histone H3.	GO:0016569|covalent chromatin modification;GO:0006325|chromatin organization;GO:0006338|chromatin remodeling;GO:0048813|dendrite morphogenesis;GO:0035076|ecdysone receptor-mediated signaling pathway;GO:0030097|hemopoiesis;GO:0046331|lateral inhibition;GO:0007095|mitotic G2 DNA damage checkpoint;GO:0045824|negative regulation of innate immune response;GO:0046426|negative regulation of JAK-STAT cas…	GO:0016589|NURF complex;	GO:0003677|DNA binding;GO:0016922|ligand-dependent nuclear receptor binding;GO:0070577|lysine-acetylated histone binding;GO:0035064|methylated histone binding;GO:0008270|zinc ion binding;	K11728	BPTF, E(bx); nucleosome-remodeling factor subunit BPTF
ENSG00000264451	2.82804	1.4998	0.0475064	up	yes	RP11-433M22.2	lincRNA	chr17:48460370-48466040:+	gi|355757016|gb|EHH60624.1|	hypothetical protein EGM_12020, partial [Macaca fascicularis]	gi|551885955|tpe|HG509171.1|	TPA: Homo sapiens long non-coding RNA OTTHUMT00000443444.1 (RP11-433M22.2 gene), lincRNA	Q8WTZ3	80.1	9e-17	Zinc finger protein ENSP00000375192	.	.	.	.	pfam13900	GVQW	Putative binding domain. This short domain is often found nested inside other longer domains. The function is not known, but the domain carries a highly conserved GVQW motif. The members are rich in proline and cysteine. This may be a binding domain.	GO:0006355|regulation of transcription, DNA-templated;GO:0006351|transcription, DNA-templated;	GO:0005634|nucleus;	GO:0003677|DNA binding;GO:0046872|metal ion binding;	.	.
ENSG00000264548	1.98762	0.991041	0.0234032	up	yes	RP13-516M14.2	antisense	chr17:82214227-82217352:+	gi|355561739|gb|EHH18371.1|	hypothetical protein EGK_14950, partial [Macaca mulatta]	gi|551886288|tpe|HG509574.1|	TPA: Homo sapiens long non-coding RNA OTTHUMT00000442627.1 (RP13-516M14.2 gene), antisense	Q8N7I0	120	2e-29	Protein GVQW1	.	.	.	.	pfam13900	GVQW	Putative binding domain. This short domain is often found nested inside other longer domains. The function is not known, but the domain carries a highly conserved GVQW motif. The members are rich in proline and cysteine. This may be a binding domain.	.	.	.	.	.
ENSG00000265386	0.258084	-1.95408	0.00582962	down	yes	RN7SL219P	misc_RNA	chr16:2013181-2013476:+	gi|594691438|ref|XP_007193055.1|	PREDICTED: uncharacterized protein LOC103017900 [Balaenoptera acutorostrata scammoni]	gi|425854838|ref|NG_032989.1|	Homo sapiens zinc finger protein 598 (ZNF598), RefSeqGene on chromosome 16	.	.	.	.	.	.	.	.	pfam13900	GVQW	Putative binding domain. This short domain is often found nested inside other longer domains. The function is not known, but the domain carries a highly conserved GVQW motif. The members are rich in proline and cysteine. This may be a binding domain.	.	.	.	.	.
ENSG00000265413	0.149422	-2.74253	0.0388371	down	yes	RP11-789C17.1	sense_intronic	chr18:8402847-8405161:+	gi|833494892|ref|XP_012770489.1|	hypothetical protein, conserved [Babesia bigemina]	gi|551886390|tpe|HG509726.1|	TPA: Homo sapiens long non-coding RNA OTTHUMT00000443934.1 (RP11-789C17.1 gene), sense_intronic	P11369	62	2e-08	LINE-1 retrotransposable element ORF2 protein	.	.	.	.	pfam13900	GVQW	Putative binding domain. This short domain is often found nested inside other longer domains. The function is not known, but the domain carries a highly conserved GVQW motif. The members are rich in proline and cysteine. This may be a binding domain.	GO:0006310|DNA recombination;	.	GO:0004519|endonuclease activity;GO:0046872|metal ion binding;GO:0003964|RNA-directed DNA polymerase activity;	.	.
ENSG00000265787	0.222612	-2.16739	0.0345875	down	yes	CYP4F35P	transcribed_unprocessed_pseudogene	chr18:14337423-14342524:+	gi|119621898|gb|EAX01493.1|	hCG1996875, isoform CRA_b [Homo sapiens]	gi|223029450|ref|NR_026756.1|	Homo sapiens cytochrome P450, family 4, subfamily F, polypeptide 35, pseudogene (CYP4F35P), non-coding RNA	Q08477	77	3e-13	Docosahexaenoic acid omega-hydroxylase CYP4F3	.	.	.	.	pfam03678	Adeno_hexon_C	Hexon, adenovirus major coat protein, C-terminal domain. Hexon is the major coat protein from adenovirus type 2. Hexon forms a homo-trimer. The 240 copies of the hexon trimer are organized so that 12 lie on each of the 20 facets. The central 9 hexons in a facet are cemented together by 12 copies of polypeptide IX. The penton complex, formed by the peripentonal hexons and base hexon (holding in pl…	GO:0006690|icosanoid metabolic process;GO:0006691|leukotriene metabolic process;	GO:0005789|endoplasmic reticulum membrane;GO:0016021|integral component of membrane;GO:0031090|organelle membrane;	GO:0097259|20-aldehyde-leukotriene B4 20-monooxygenase activity;GO:0097258|20-hydroxy-leukotriene B4 omega oxidase activity;GO:0052871|alpha-tocopherol omega-hydroxylase activity;GO:0020037|heme binding;GO:0005506|iron ion binding;GO:0050051|leukotriene-B4 20-monooxygenase activity;GO:0004497|monooxygenase activity;GO:0019825|oxygen binding;	K17726	CYP4F2_3; leukotriene-B4 20-monooxygenase / phylloquinone omega-hydroxylase [EC:1.14.13.30 1.14.13.194]
ENSG00000265939	0.506597	-0.981089	0.0368083	down	yes	UBE2CP2	processed_pseudogene	chr18:22900486-22900995:-	gi|826274401|ref|XP_012521140.1|	PREDICTED: ubiquitin-conjugating enzyme E2 C-like isoform X1 [Propithecus coquereli]	gi|298358725|ref|NG_022483.1|	Homo sapiens ubiquitin-conjugating enzyme E2C pseudogene 2 (UBE2CP2) on chromosome 18	Q4R9D1	152	7e-45	Ubiquitin-conjugating enzyme E2 C	.	.	.	.	pfam00179	UQ_con	Ubiquitin-conjugating enzyme. Proteins destined for proteasome-mediated degradation may be ubiquitinated. Ubiquitination follows conjugation of ubiquitin to a conserved cysteine residue of UBC homologues. TSG101 is one of several UBC homologues that lacks this active site cysteine.	GO:0031145|anaphase-promoting complex-dependent proteasomal ubiquitin-dependent protein catabolic process;GO:0051301|cell division;GO:0010458|exit from mitosis;GO:0010994|free ubiquitin chain polymerization;GO:0070979|protein K11-linked ubiquitination;GO:0070936|protein K48-linked ubiquitination;GO:0006511|ubiquitin-dependent protein catabolic process;	GO:0005680|anaphase-promoting complex;	GO:0005524|ATP binding;GO:0004842|ubiquitin-protein transferase activity;	K06688	UBE2C, UBC11; ubiquitin-conjugating enzyme E2 C [EC:2.3.2.23]
ENSG00000266473	0.615829	-0.699398	0.0317963	down	yes	RP11-401F2.3	antisense	chr17:67244837-67245806:+	gi|402913558|ref|XP_003919251.1|	PREDICTED: collagen alpha-2(VIII) chain-like [Papio anubis]	gi|551885125|tpe|HG509354.1|	TPA: Homo sapiens long non-coding RNA OTTHUMT00000447080.1 (RP11-401F2.3 gene), antisense	.	.	.	.	.	.	.	.	pfam09839	DUF2066	Uncharacterized protein conserved in bacteria (DUF2066). This domain, found in various prokaryotic proteins, has no known function.	.	.	.	.	.
ENSG00000267731	3.79114	1.92263	0.0401502	up	yes	RP11-147L13.8	lincRNA	chr17:68189884-68192802:+	gi|355746258|gb|EHH50883.1|	hypothetical protein EGM_01778, partial [Macaca fascicularis]	gi|551885802|tpe|HG509360.1|	TPA: Homo sapiens long non-coding RNA OTTHUMT00000450105.1 (RP11-147L13.8 gene), lincRNA	Q8N2A0	81.6	7e-16	Putative uncharacterized protein encoded by LINC00269	.	.	.	.	pfam13900	GVQW	Putative binding domain. This short domain is often found nested inside other longer domains. The function is not known, but the domain carries a highly conserved GVQW motif. The members are rich in proline and cysteine. This may be a binding domain.	.	.	.	.	.
ENSG00000267890	0.399287	-1.3245	0.0217532	down	yes	CTD-2126E3.4	lincRNA	chr19:50075123-50075902:+	.	.	gi|551889834|tpe|HG510947.1|	TPA: Homo sapiens long non-coding RNA OTTHUMT00000465243.1 (CTD-2126E3.4 gene), lincRNA	.	.	.	.	.	.	.	.	pfam15316	MDFI	MyoD family inhibitor. Members of this family inhibits the transactivation activity of the MyoD family of myogenic factors. They affect axin-mediated regulation of the Wnt and JNK signaling pathways, and regulate expression from viral promoters.	.	.	.	.	.
ENSG00000268047	0.460192	-1.11969	0.0259221	down	yes	AC018766.6	antisense	chr19:49852887-49854967:-	gi|355756048|gb|EHH59795.1|	hypothetical protein EGM_09989, partial [Macaca fascicularis]	gi|551889817|tpe|HG510939.1|	TPA: Homo sapiens long non-coding RNA OTTHUMT00000465823.1 (AC018766.6 gene), antisense	Q86YD1	63.5	6e-11	Prostate tumor-overexpressed gene 1 protein	.	.	.	.	pfam11232	Med25	Mediator complex subunit 25 PTOV activation and synapsin 2. Mediator is a large complex of up to 33 proteins that is conserved from plants to fungi to humans - the number and representation of individual subunits varying with species. It is arranged into four different sections, a core, a head, a tail and a kinase-active part, and the number of subunits within each of these is what varies with sp…	GO:0006355|regulation of transcription, DNA-templated;GO:0006351|transcription, DNA-templated;	GO:0005634|nucleus;GO:0048471|perinuclear region of cytoplasm;GO:0005886|plasma membrane;	.	.	.
ENSG00000268896	2.94147	1.55654	0.0442653	up	yes	RP11-256I23.1	antisense	chr2:219547211-219547658:-	gi|795610872|ref|XP_011918139.1|	PREDICTED: transmembrane protein 198 isoform X2 [Cercocebus atys]	gi|551848584|tpe|HG495248.1|	TPA: Homo sapiens long non-coding RNA OTTHUMT00000464656.1 (RP11-256I23.1 gene), antisense	Q08E36	69.7	3e-13	Transmembrane protein 198	.	.	.	.	pfam13886	DUF4203	Domain of unknown function (DUF4203). This is the N-terminal region of 7tm proteins. The function is not known.	GO:0007275|multicellular organismal development;GO:0090263|positive regulation of canonical Wnt signaling pathway;GO:0016055|Wnt signaling pathway;	GO:0016023|cytoplasmic membrane-bounded vesicle;GO:0016021|integral component of membrane;GO:0005886|plasma membrane;	.	.	.
ENSG00000269761	0.175979	-2.50653	0.030893	down	yes	RP11-1137G4.4	processed_pseudogene	chr19:7005012-7006074:-	gi|15208243|dbj|BAB63146.1|	hypothetical protein [Macaca fascicularis]	gi|211938451|ref|NR_024372.1|	Homo sapiens MAP/microtubule affinity-regulating kinase 1 pseudogene (FLJ25758), non-coding RNA	Q05512	44.3	5e-27	Serine/threonine-protein kinase MARK2	.	.	.	.	pfam00069	Pkinase	Protein kinase domain.	GO:0030010|establishment of cell polarity;GO:0045197|establishment or maintenance of epithelial cell apical/basal polarity;GO:0035556|intracellular signal transduction;GO:0000226|microtubule cytoskeleton organization;GO:0001764|neuron migration;GO:0010976|positive regulation of neuron projection development;GO:0046777|protein autophosphorylation;GO:0006468|protein phosphorylation;GO:0050770|regul…	GO:0005884|actin filament;GO:0045180|basal cortex;GO:0005913|cell-cell adherens junction;GO:0016328|lateral plasma membrane;GO:0016020|membrane;GO:0097427|microtubule bundle;GO:0005634|nucleus;GO:0005886|plasma membrane;	GO:0005524|ATP binding;GO:0098641|cadherin binding involved in cell-cell adhesion;GO:0008289|lipid binding;GO:0000287|magnesium ion binding;GO:0044822|poly(A) RNA binding;GO:0004674|protein serine/threonine kinase activity;GO:0050321|tau-protein kinase activity;	K08798	MARK; MAP/microtubule affinity-regulating kinase [EC:2.7.11.1]
ENSG00000269904	0.28821	-1.79481	0.00021362	down	yes	MAP2K4P1	transcribed_processed_pseudogene	chrX:73524275-73563085:-	gi|826321013|ref|XP_012509406.1|	PREDICTED: dual specificity mitogen-activated protein kinase kinase 4 isoform X1 [Propithecus coquereli]	gi|261862295|ref|NR_029423.1|	Homo sapiens mitogen-activated protein kinase kinase 4 pseudogene 1 (MAP2K4P1), non-coding RNA	P45985	637	0	Dual specificity mitogen-activated protein kinase kinase 4	.	.	.	.	pfam00069	Pkinase	Protein kinase domain.	GO:0006915|apoptotic process;GO:0061049|cell growth involved in cardiac muscle cell development;GO:0071260|cellular response to mechanical stimulus;GO:0072709|cellular response to sorbitol;GO:0038095|Fc-epsilon receptor signaling pathway;GO:0007254|JNK cascade;GO:2000672|negative regulation of motor neuron apoptotic process;GO:0045740|positive regulation of DNA replication;GO:0043525|positive reg…	GO:0030424|axon;GO:0005737|cytoplasm;GO:0005829|cytosol;GO:0032839|dendrite cytoplasm;GO:0005634|nucleus;GO:0043204|perikaryon;	GO:0005524|ATP binding;GO:0008545|JUN kinase kinase activity;GO:0004672|protein kinase activity;GO:0004713|protein tyrosine kinase activity;GO:0004702|receptor signaling protein serine/threonine kinase activity;	K04430	MAP2K4, MKK4; mitogen-activated protein kinase kinase 4 [EC:2.7.12.2]
ENSG00000269906	1.89263	0.920391	0.0080742	up	yes	RP11-248J18.2	sense_intronic	chr14:50662511-50663178:-	.	.	gi|551878076|tpe|HG506188.1|	TPA: Homo sapiens long non-coding RNA OTTHUMT00000467537.1 (RP11-248J18.2 gene), sense_intronic	.	.	.	.	.	.	.	.	pfam07532	Big_4	Bacterial Ig-like domain (group 4). This family consists of bacterial domains with an Ig-like fold. Members of this family are found in a variety of bacterial surface proteins.	.	.	.	.	.
ENSG00000270002	2.31115	1.20861	0.0271551	up	yes	RP11-93H12.4	antisense	chr10:85644073-85648066:+	gi|402880260|ref|XP_003903726.1|	PREDICTED: glutamate receptor ionotropic, delta-1-like [Papio anubis]	gi|21748827|dbj|AK090628.1|	Homo sapiens cDNA FLJ33309 fis, clone BNGH42004538	Q9ULK0	142	2e-33	Glutamate receptor ionotropic, delta-1	.	.	.	.	pfam00060	Lig_chan	Ligand-gated ion channel. This family includes the four transmembrane regions of the ionotropic glutamate receptors and NMDA receptors.	GO:0035176|social behavior;	GO:0030054|cell junction;GO:0070062|extracellular exosome;GO:0016021|integral component of membrane;GO:0045211|postsynaptic membrane;	GO:0005234|extracellular-glutamate-gated ion channel activity;GO:0004970|ionotropic glutamate receptor activity;	K05206	GRID1; glutamate receptor delta-1 subunit
ENSG00000270022	5.10458	2.35179	0.0174846	up	yes	RNU12	lincRNA	chr22:42615244-42615907:+	.	.	gi|551893148|tpe|HG512333.1|	TPA: Homo sapiens long non-coding RNA OTTHUMT00000467709.1 (RNU12 gene), lincRNA	.	.	.	.	.	.	.	.	pfam04124	Dor1	Dor1-like family. Dor1 is involved in vesicle targeting to the yeast Golgi apparatus and complexes with a number of other trafficking proteins, which include Sec34 and Sec35.	.	.	.	.	.
ENSG00000270104	6.89319	2.78517	0.0296308	up	yes	RP11-245P10.6	lincRNA	chr1:228384114-228385016:-	.	.	gi|551899491|tpe|HG493293.1|	TPA: Homo sapiens long non-coding RNA OTTHUMT00000467428.1 (RP11-245P10.6 gene), lincRNA	.	.	.	.	.	.	.	.	pfam12966	AtpR	N-ATPase, AtpR subunit. Membrane protein with three predicted transmembrane segments, two of which contain conserved Arg residues. AtpR genes are found in the N-ATPase (archaeal-type F1-Fo-ATPase) operons and are predicted to interact with the conserved Glu/Asp residues in the c subunits, regulating the assembly and/or function of the membrane-embedded ring of 'c' (proteolipid) subunits (pfam0013…	.	.	.	.	.
ENSG00000270147	0.300663	-1.73378	0.0109747	down	yes	RP11-646I6.6	lincRNA	chr4:56396312-56396871:+	gi|795494358|ref|XP_011709032.1|	PREDICTED: amidophosphoribosyltransferase isoform X2 [Macaca nemestrina]	gi|551852991|tpe|HG496917.1|	TPA: Homo sapiens long non-coding RNA OTTHUMT00000467722.1 (RP11-646I6.6 gene), lincRNA	Q06203	90.5	1e-19	Amidophosphoribosyltransferase	PH0240	56.2	8e-09	COG0034	pfam10316	7TM_GPCR_Srbc	Serpentine type 7TM GPCR chemoreceptor Srbc. Chemoreception is mediated in Caenorhabditis elegans by members of the seven-transmembrane G-protein-coupled receptor class (7TM GPCRs) of proteins which are of the serpentine type. Srbc is a solo family amongst the superfamilies of chemoreceptors. Chemoperception is one of the central senses of soil nematodes like C. elegans which are otherwise 'blind…	GO:0006189|'de novo' IMP biosynthetic process;GO:0031100|organ regeneration;GO:0035690|cellular response to drug;GO:0032869|cellular response to insulin stimulus;GO:0000082|G1/S transition of mitotic cell cycle;GO:0006543|glutamine catabolic process;GO:0001822|kidney development;GO:0007595|lactation;GO:0060135|maternal process involved in female pregnancy;GO:0009116|nucleoside metabolic process;G…	GO:0005829|cytosol;	GO:0051539|4 iron, 4 sulfur cluster binding;GO:0004044|amidophosphoribosyltransferase activity;GO:0046872|metal ion binding;	K00764	purF, PPAT; amidophosphoribosyltransferase [EC:2.4.2.14]
ENSG00000270989	0.168425	-2.56983	0.0497495	down	yes	RP11-844P9.4	processed_pseudogene	chr5:176203314-176203710:-	gi|558111924|ref|XP_006109820.1|	PREDICTED: LOW QUALITY PROTEIN: selenophosphate synthetase 1 [Myotis lucifugus]	gi|19774447|gb|AC116427.1|	Homo sapiens chromosome 5 clone CTD-2316N20, complete sequence	Q6GL12	95.1	2e-22	Selenide, water dikinase 1	.	.	.	.	pfam06161	DUF975	Protein of unknown function (DUF975). Family of uncharacterized bacterial proteins.	.	GO:0031965|nuclear membrane;GO:0005886|plasma membrane;	GO:0005524|ATP binding;GO:0046982|protein heterodimerization activity;GO:0042803|protein homodimerization activity;GO:0004756|selenide, water dikinase activity;	K01008	selD, SEPHS; selenide, water dikinase [EC:2.7.9.3]
ENSG00000271218	0.261816	-1.93338	0.0475743	down	yes	RP3-523E19.2	antisense	chr6:53918974-53920788:-	gi|585151538|ref|XP_006728201.1|	PREDICTED: leucine-rich repeat-containing protein 1 [Leptonychotes weddellii]	gi|551859366|tpe|HG499286.1|	TPA: Homo sapiens long non-coding RNA OTTHUMT00000469663.1 (RP3-523E19.2 gene), antisense	Q9BTT6	73.9	2e-14	Leucine-rich repeat-containing protein 1	.	.	.	.	pfam15258	FAM222A	Protein family of FAM222A. This protein family, FAM222A are a domain of unknown function. This family of proteins is found in eukaryotes and are typically between 411 and 562 amino acids in length. In humans, the gene encoding this protein domain lies in the position, chromosome 12 open reading frame 34.	.	GO:0005737|cytoplasm;GO:0016020|membrane;	.	.	.
ENSG00000271303	2.24469	1.16652	0.0239022	up	yes	SRXN1	protein_coding	chr20:646615-653370:-	gi|21758427|dbj|BAC05302.1|	unnamed protein product [Homo sapiens]	gi|425905339|ref|NM_080725.2|	Homo sapiens sulfiredoxin 1 (SRXN1), mRNA	Q9BYN0	209	1e-61	Sulfiredoxin-1	SPBC106.02c	79.7	4e-16	COG5119	pfam02195	ParBc	ParB-like nuclease domain.	GO:0006979|response to oxidative stress;	GO:0005829|cytosol;	GO:0005524|ATP binding;GO:0016667|oxidoreductase activity, acting on a sulfur group of donors;GO:0032542|sulfiredoxin activity;	K12260	SRX1; sulfiredoxin [EC:1.8.98.2]
ENSG00000271387	2.41529	1.27219	0.0347206	up	yes	RP11-382D12.2	lincRNA	chr1:184385753-184386704:-	.	.	gi|551898774|tpe|HG493000.1|	TPA: Homo sapiens long non-coding RNA OTTHUMT00000469681.1 (RP11-382D12.2 gene), lincRNA	.	.	.	.	.	.	.	.	pfam13723	Ketoacyl-synt_2	Beta-ketoacyl synthase, N-terminal domain.	.	.	.	.	.
ENSG00000271643	1.80783	0.854263	0.00372179	up	yes	RP11-10C24.3	lincRNA	chr3:33795688-33796950:-	gi|545688824|ref|NP_001270724.1|	uncharacterized protein LOC101865568 precursor [Macaca fascicularis]	gi|585789411|ref|NG_033961.1|	Homo sapiens programmed cell death 6 interacting protein (PDCD6IP), RefSeqGene on chromosome 3	Q8N976	73.9	3e-14	Putative uncharacterized protein FLJ38264	.	.	.	.	pfam13900	GVQW	Putative binding domain. This short domain is often found nested inside other longer domains. The function is not known, but the domain carries a highly conserved GVQW motif. The members are rich in proline and cysteine. This may be a binding domain.	.	.	.	.	.
ENSG00000271717	8.72617	3.12535	0.0215853	up	yes	CTD-3020H12.4	antisense	chr19:8222153-8239648:-	.	.	gi|551888305|tpe|HG510322.1|	TPA: Homo sapiens long non-coding RNA OTTHUMT00000470871.1 (CTD-3020H12.4 gene), antisense	.	.	.	.	.	.	.	.	pfam02669	KdpC	K+-transporting ATPase, c chain. This family consists of K+-transporting ATPase, c chain, KdpC. KdpC forms strong interactions with the KdpA subunit, serving to assemble and stabilize the Kdp complex. It has been suggested that KdpC could be one of the connecting links between the energy providing subunit KdpB and the K+-transporting subunit KdpA. The K+ transport system actively transports K+ io…	.	.	.	.	.
ENSG00000271725	0.131978	-2.92163	0.0152793	down	yes	RP11-761I4.4	3prime_overlapping_ncRNA	chr15:81303215-81309391:-	.	.	gi|551880666|tpe|HG507312.1|	TPA: Homo sapiens long non-coding RNA OTTHUMT00000471393.1 (RP11-761I4.4 gene), 3prime_overlapping_ncrna	.	.	.	.	.	.	.	.	pfam04138	GtrA	GtrA-like protein. Members of this family are predicted to be integral membrane proteins with three or four transmembrane spans. They are involved in the synthesis of cell surface polysaccharides. The GtrA family are a subset of this family. GtrA is predicted to be an integral membrane protein with 4 transmembrane spans. It is involved is in O antigen modification by Shigella flexneri bacteriopha…	.	.	.	.	.
ENSG00000272008	0.492037	-1.02316	0.0111443	down	yes	RP11-393I2.4	antisense	chr6:87151159-87155285:-	gi|675771658|ref|XP_008974746.1|	PREDICTED: uncharacterized protein LOC103786834 [Pan paniscus]	gi|551859764|tpe|HG499438.1|	TPA: Homo sapiens long non-coding RNA OTTHUMT00000471304.1 (RP11-393I2.4 gene), antisense	.	.	.	.	.	.	.	.	pfam15223	DUF4584	Domain of unknown function (DUF4584). This family of proteins is found in eukaryotes. Proteins in this family are approximately 835 amino acids in length. The family is found in association with pfam02437.	.	.	.	.	.
ENSG00000272056	6.91023	2.78873	0.039142	up	yes	RP11-503P10.1	antisense	chr2:27053618-27054276:-	gi|10435319|dbj|BAB14560.1|	unnamed protein product [Homo sapiens]	gi|551844838|tpe|HG493773.1|	TPA: Homo sapiens long non-coding RNA OTTHUMT00000470790.1 (RP11-503P10.1 gene), antisense	Q8NDL9	119	4e-29	Cytosolic carboxypeptidase-like protein 5	.	.	.	.	pfam14761	HPS3_N	Hermansky-Pudlak syndrome 3. This domain is at the N-terminus of these vertebrate proteins. This region carries the clathrin-binding motif LLDFE at residues 172-176 in the human Hermansky-Pudlak syndrome 3 protein. There is also reference to a human Mendelian disease at MIM:614072.	GO:0051607|defense response to virus;GO:0035611|protein branching point deglutamylation;GO:0035608|protein deglutamylation;	GO:0005737|cytoplasm;GO:0005829|cytosol;GO:0030496|midbody;GO:0072686|mitotic spindle;GO:0005634|nucleus;	GO:0004181|metallocarboxypeptidase activity;GO:0015631|tubulin binding;GO:0008270|zinc ion binding;	.	.
ENSG00000272196	0.575274	-0.797679	0.0160622	down	yes	HIST2H2AA4	protein_coding	chr1:149851061-149851624:+	gi|685517581|ref|XP_009178380.1|	PREDICTED: histone H2A type 2-A-like [Papio anubis]	gi|329755378|gb|AC244432.1|	Homo sapiens FOSMID clone COR2A-DD0002SD0NU_O11 from chromosome 1, complete sequence	P0CC09	219	2e-71	Histone H2A type 2-A	SPAC19G12.06c	182	1e-57	COG5262	pfam00125	Histone	Core histone H2A/H2B/H3/H4.	GO:0006342|chromatin silencing;	GO:0070062|extracellular exosome;GO:0000790|nuclear chromatin;GO:0000786|nucleosome;	GO:0003677|DNA binding;	K11251	H2A; histone H2A
ENSG00000272218	8.72273	3.12478	0.0268031	up	yes	RP11-11N5.3	lincRNA	chr4:186892552-186892983:+	.	.	gi|551855050|tpe|HG497615.1|	TPA: Homo sapiens long non-coding RNA OTTHUMT00000470323.1 (RP11-11N5.3 gene), lincRNA	.	.	.	.	.	.	.	.	pfam05296	TAS2R	Mammalian taste receptor protein (TAS2R). This family consists of several forms of mammalian taste receptor proteins (TAS2Rs). TAS2Rs are G protein-coupled receptors expressed in subsets of taste receptor cells of the tongue and palate epithelia and are organized in the genome in clusters. The proteins are genetically linked to loci that influence bitter perception in mice and humans.	.	.	.	.	.
ENSG00000272265	0.134639	-2.89283	0.035397	down	yes	CTD-2287O16.4	lincRNA	chr5:116078110-116078570:-	.	.	gi|551857034|tpe|HG498363.1|	TPA: Homo sapiens long non-coding RNA OTTHUMT00000470699.1 (CTD-2287O16.4 gene), lincRNA	.	.	.	.	.	.	.	.	pfam01824	MatK_N	MatK/TrnK amino terminal region. The function of this region is unknown.	.	.	.	.	.
ENSG00000272523	0.615317	-0.700598	0.00368499	down	yes	LINC01023	lincRNA	chr5:108727825-108728260:-	gi|119569444|gb|EAW49059.1|	hCG2028058 [Homo sapiens]	gi|551856920|tpe|HG498316.1|	TPA: Homo sapiens long non-coding RNA OTTHUMT00000470689.1 (CTC-329H14.4 gene), lincRNA	.	.	.	.	.	.	.	.	pfam07259	ProSAAS	ProSAAS precursor. This family consists of several mammalian proSAAS precursor proteins. ProSAAS mRNA is expressed primarily in brain and other neuroendocrine tissues (pituitary, adrenal, pancreas); within brain, the mRNA is broadly distributed among neurons. ProSAAS is thought to be an endogenous inhibitor of prohormone convertase 1 may function as a neuropeptide. N-terminal fragments of proSAAS…	.	.	.	.	.
ENSG00000272630	0.484185	-1.04637	0.0129557	down	yes	RP11-344N10.5	lincRNA	chr10:73098044-73101297:-	gi|119601568|gb|EAW81162.1|	hCG1814203 [Homo sapiens]	gi|551868598|tpe|HG502987.1|	TPA: Homo sapiens long non-coding RNA OTTHUMT00000473120.1 (RP11-344N10.5 gene), lincRNA	Q8N2A0	57	9e-08	Putative uncharacterized protein encoded by LINC00269	.	.	.	.	pfam13900	GVQW	Putative binding domain. This short domain is often found nested inside other longer domains. The function is not known, but the domain carries a highly conserved GVQW motif. The members are rich in proline and cysteine. This may be a binding domain.	.	.	.	.	.
ENSG00000272745	7.40348	2.8882	0.045741	up	yes	RP5-1007H16.1	lincRNA	chr7:7619872-7620543:+	.	.	gi|551861110|tpe|HG499995.1|	TPA: Homo sapiens long non-coding RNA OTTHUMT00000472337.1 (RP5-1007H16.1 gene), lincRNA	.	.	.	.	.	.	.	.	pfam03125	Sre	C. elegans Sre G protein-coupled chemoreceptor. Caenorhabditis elegans Sre proteins are candidate chemosensory receptors. There are four main recognized groups of such receptors: Odr-10, Sra, Sro, and Srg. Sre (this family), Sra pfam02117 and Srb pfam02175 comprise the Sra group. All of the above receptors are thought to be G protein-coupled seven transmembrane domain proteins. The existence of s…	.	.	.	.	.
ENSG00000273024	0.462561	-1.11228	0.00815839	down	yes	INTS4P2	transcribed_unprocessed_pseudogene	chr7:65647864-65715661:+	gi|121945667|sp|Q2T9F4.1|IN4L2_HUMAN	RecName: Full=Integrator complex subunit 4-like protein 2 [Homo sapiens]	gi|608788377|ref|NR_027392.2|	Homo sapiens integrator complex subunit 4 pseudogene 2 (INTS4P2), non-coding RNA	Q96HW7	799	0	Integrator complex subunit 4	.	.	.	.	pfam13543	KSR1-SAM	SAM like domain present in kinase suppressor RAS 1.	GO:0016180|snRNA processing;GO:0042795|snRNA transcription from RNA polymerase II promoter;	GO:0032039|integrator complex;GO:0005654|nucleoplasm;	.	K13141	INTS4; integrator complex subunit 4
ENSG00000273058	0.575448	-0.797242	0.00049724	down	yes	RP11-385F5.5	antisense	chr1:236536162-236536704:-	.	.	gi|17977721|emb|AL359921.13|	Human DNA sequence from clone RP11-385F5 on chromosome 1, complete sequence	.	.	.	.	.	.	.	.	pfam05287	PMG	PMG protein. This family consists of several mouse anagen-specific protein mKAP13 (PMG1 and PMG2). PMG1 and 2 contain characteristic repeats reminiscent of the keratin-associated proteins (KAPs). Both genes are expressed in growing hair follicles in skin as well as in sebaceous and eccrine sweat glands. Interestingly, expression is also detected in the mammary epithelium where it is limited to th…	.	.	.	.	.
ENSG00000273598	6.92739	2.79231	0.0454516	up	yes	PMS2P6	unprocessed_pseudogene	chr7:75316048-75327765:-	gi|1304125|dbj|BAA07514.1|	PMS4 [Homo sapiens]	gi|92447469|gb|BC093094.1|	Homo sapiens cDNA clone IMAGE:30717005, **** WARNING: chimeric clone ****	A4D2B8	260	3e-83	Putative postmeiotic segregation increased 2-like protein 1	SPAC19G12.02c	108	7e-26	COG0323	pfam13589	HATPase_c_3	Histidine kinase-, DNA gyrase B-, and HSP90-like ATPase. This family represents, additionally, the structurally related ATPase domains of histidine kinase, DNA gyrase B and HSP90.	GO:0006298|mismatch repair;GO:0016446|somatic hypermutation of immunoglobulin genes;	GO:0032389|MutLalpha complex;	GO:0016887|ATPase activity;GO:0016301|kinase activity;GO:0003697|single-stranded DNA binding;	.	.
ENSG00000273792	7.98492	2.99728	0.0349487	up	yes	RP11-554D20.2	sense_intronic	chr15:60847757-60849068:-	gi|694969398|ref|XP_009431439.1|	PREDICTED: uncharacterized protein LOC104002990 isoform X1 [Pan troglodytes]	gi|338968872|ref|NG_029246.1|	Homo sapiens RAR-related orphan receptor A (RORA), RefSeqGene on chromosome 15	.	.	.	.	.	.	.	.	pfam09739	MCM_bind	Mini-chromosome maintenance replisome factor. This entry is of proteins of approximately 600 residues in length containing alternating regions of conservation and low complexity. The Arabidopsis protein is a replisome factor found to bind with the mini-chromosome maintenance, MCM-binding, complex and is crucial for efficient DNA replication.	.	.	.	.	.
ENSG00000274376	0.412086	-1.27898	0.0495216	down	yes	ADAMTS7P1	transcribed_unprocessed_pseudogene	chr15:82298553-82334609:+	gi|767983147|ref|XP_011519468.1|	PREDICTED: A disintegrin and metalloproteinase with thrombospondin motifs 7 isoform X2 [Homo sapiens]	gi|603845845|ref|NR_045529.3|	Homo sapiens ADAMTS7 pseudogene 1 (ADAMTS7P1), non-coding RNA	Q9UKP4	59.3	3e-07	A disintegrin and metalloproteinase with thrombospondin motifs 7	.	.	.	.	pfam05986	ADAM_spacer1	ADAM-TS Spacer 1. This family represents the Spacer-1 region from the ADAM-TS family of metalloproteinases.	GO:0071773|cellular response to BMP stimulus;GO:0071347|cellular response to interleukin-1;GO:0071356|cellular response to tumor necrosis factor;GO:0032331|negative regulation of chondrocyte differentiation;GO:0036066|protein O-linked fucosylation;GO:0051603|proteolysis involved in cellular protein catabolic process;	GO:0009986|cell surface;GO:0005788|endoplasmic reticulum lumen;GO:0005578|proteinaceous extracellular matrix;	GO:0004222|metalloendopeptidase activity;GO:0008237|metallopeptidase activity;GO:0008270|zinc ion binding;	K08622	ADAMTS7; a disintegrin and metalloproteinase with thrombospondin motifs 7 [EC:3.4.24.-]
ENSG00000274775	0.373853	-1.41946	0.0213527	down	yes	RP1-274L7.4	transcribed_unprocessed_pseudogene	chrX:130445085-130524257:-	gi|743744334|ref|XP_010966776.1|	PREDICTED: LOW QUALITY PROTEIN: fibrous sheath-interacting protein 2-like [Camelus bactrianus]	gi|339275801|ref|NG_029274.1|	Homo sapiens fibrous sheath-interacting protein 2-like (LOC100130684) pseudogene on chromosome X	Q5CZC0	63.9	7e-08	Fibrous sheath-interacting protein 2	.	.	.	.	pfam13900	GVQW	Putative binding domain. This short domain is often found nested inside other longer domains. The function is not known, but the domain carries a highly conserved GVQW motif. The members are rich in proline and cysteine. This may be a binding domain.	.	GO:0005739|mitochondrion;	.	.	.
ENSG00000276633	0.24484	-2.03009	0.0435287	down	yes	AJ011931.1	sense_intronic	chr21:45870854-45873345:+	.	.	gi|7717449|emb|AL163303.2|	Homo sapiens chromosome 21 segment HS21C103	.	.	.	.	.	.	.	.	pfam15240	Pro-rich	Proline-rich. This family includes several eukaryotic proline-rich proteins.	.	.	.	.	.
ENSG00000276649	3.4232	1.77534	0.0209266	up	yes	RP5-858L17.1	antisense	chr20:1888128-1894374:-	.	.	gi|9581830|emb|AL117335.26|	Human DNA sequence from clone RP5-858L17 on chromosome 20, complete sequence	.	.	.	.	.	.	.	.	pfam07690	MFS_1	Major Facilitator Superfamily.	.	.	.	.	.
ENSG00000276966	0.611837	-0.70878	4.09084e-06	down	yes	HIST1H4E	protein_coding	chr6:26204552-26206038:+	gi|675675656|ref|XP_003804484.2|	PREDICTED: LOW QUALITY PROTEIN: uncharacterized protein LOC100980546 [Pan paniscus]	gi|15487679|emb|AL031777.5|	Human DNA sequence from clone RP1-34B20 on chromosome 6p21.31-22.2, complete sequence	Q28DR4	164	6e-47	Histone H4	.	.	.	.	pfam00125	Histone	Core histone H2A/H2B/H3/H4.	GO:0006352|DNA-templated transcription, initiation;GO:0006334|nucleosome assembly;	GO:0000786|nucleosome;GO:0005634|nucleus;	GO:0003677|DNA binding;	K11254	H4; histone H4
ENSG00000277452	10.022	3.3251	0.0199902	up	yes	RN7SL473P	misc_RNA	chr1:150566562-150566860:-	gi|594691438|ref|XP_007193055.1|	PREDICTED: uncharacterized protein LOC103017900 [Balaenoptera acutorostrata scammoni]	gi|18476570|emb|AL356356.17|	Human DNA sequence from clone RP11-54A4 on chromosome 1, complete sequence	.	.	.	.	.	.	.	.	pfam13900	GVQW	Putative binding domain. This short domain is often found nested inside other longer domains. The function is not known, but the domain carries a highly conserved GVQW motif. The members are rich in proline and cysteine. This may be a binding domain.	.	.	.	.	.
ENSG00000277566	10.0237	3.32535	0.0135	up	yes	RP11-545P7.9	sense_intronic	chr12:113249466-113250042:+	.	.	gi|21617628|gb|AC089999.20|	Homo sapiens 12 BAC RP11-545P7 (Roswell Park Cancer Institute Human BAC Library) complete sequence	.	.	.	.	.	.	.	.	pfam02422	Keratin	Keratin. This family represents avian keratin proteins, found in feathers, scale and claw.	.	.	.	.	.
ENSG00000277959	0.463256	-1.11012	0.0157988	down	yes	RP11-45A17.2	antisense	chr10:131971202-131971533:+	.	.	gi|12214292|emb|AL162274.17|	Human DNA sequence from clone RP11-45A17 on chromosome 10, complete sequence	.	.	.	.	.	.	.	.	pfam14672	LCE	Late cornified envelope. This is a family of late cornified envelope proteins that are expressed in skin.	.	.	.	.	.
ENSG00000278035	0.115907	-3.10896	0.037233	down	yes	RP11-234K24.6	lincRNA	chr20:36233851-36234297:+	.	.	gi|385719191|ref|NG_031853.2|	Homo sapiens erythrocyte membrane protein band 4.1-like 1 (EPB41L1), RefSeqGene on chromosome 20	.	.	.	.	.	.	.	.	pfam14093	DUF4271	Domain of unknown function (DUF4271). This family of integral membrane proteins is functionally uncharacterized. This family of proteins is found in bacteria. Proteins in this family are typically between 221 and 326 amino acids in length.	.	.	.	.	.
ENSG00000278192	0.170969	-2.54819	0.0260234	down	yes	RP5-1056H1.2	lincRNA	chr20:6065966-6067897:-	gi|355564363|gb|EHH20863.1|	hypothetical protein EGK_03802, partial [Macaca mulatta]	gi|10639090|emb|AL118505.17|	Human DNA sequence from clone RP5-1056H1 on chromosome 20, complete sequence	Q8N2A0	82.4	2e-16	Putative uncharacterized protein encoded by LINC00269	.	.	.	.	pfam13900	GVQW	Putative binding domain. This short domain is often found nested inside other longer domains. The function is not known, but the domain carries a highly conserved GVQW motif. The members are rich in proline and cysteine. This may be a binding domain.	.	.	.	.	.
ENSG00000278399	6.05455	2.59802	0.0422917	up	yes	RP11-74M13.5	unprocessed_pseudogene	chr12:56981211-56985960:-	gi|724946193|ref|XP_010387311.1|	PREDICTED: LOW QUALITY PROTEIN: retinol dehydrogenase 16 [Rhinopithecus roxellana]	gi|349585229|ref|NG_030124.1|	Homo sapiens retinol dehydrogenase 16 (all-trans) pseudogene (LOC390332) on chromosome 12	O75452	266	1e-85	Retinol dehydrogenase 16	Cgl1008	65.1	7e-12	COG1028	pfam00429	TLV_coat	ENV polyprotein (coat polyprotein).	GO:0006629|lipid metabolic process;	GO:0005789|endoplasmic reticulum membrane;GO:0016021|integral component of membrane;GO:0043231|intracellular membrane-bounded organelle;GO:0031090|organelle membrane;	GO:0009055|electron carrier activity;GO:0004745|retinol dehydrogenase activity;	K11154	RDH16; retinol dehydrogenase 16 [EC:1.1.1.-]
ENSG00000278919	0.412683	-1.27689	0.000190728	down	yes	AP006285.2	protein_coding	chr11:1580492-1585989:+	gi|37547429|gb|AAM98753.1|	unknown [Homo sapiens]	gi|37547428|gb|AY129010.1|	Homo sapiens clone FP17388 unknown mRNA	Q8N2A0	75.5	6e-14	Putative uncharacterized protein encoded by LINC00269	.	.	.	.	pfam13900	GVQW	Putative binding domain. This short domain is often found nested inside other longer domains. The function is not known, but the domain carries a highly conserved GVQW motif. The members are rich in proline and cysteine. This may be a binding domain.	.	.	.	.	.
ENSG00000279148	1.54456	0.627198	0.0324013	up	yes	RP11-135F9.4	TEC	chr12:100026248-100027540:-	gi|11493483|gb|AAG35515.1|AF130117_48	PRO2550 [Homo sapiens]	gi|22003945|gb|AC126474.6|	Homo sapiens 12 BAC RP11-135F9 (Roswell Park Cancer Institute Human BAC Library) complete sequence	Q8N7I0	116	8e-29	Protein GVQW1	.	.	.	.	pfam13900	GVQW	Putative binding domain. This short domain is often found nested inside other longer domains. The function is not known, but the domain carries a highly conserved GVQW motif. The members are rich in proline and cysteine. This may be a binding domain.	.	.	.	.	.
ENSG00000279184	1.7298	0.790605	0.00259646	up	yes	RP3-323A16.1	antisense	chr22:35160947-35215025:+	gi|106322|pir||B34087	hypothetical protein (L1H 3' region) - human	gi|3036782|emb|Z99755.1|	Human DNA sequence from clone CTA-714B7 on chromosome 22q12.2-13.2, complete sequence	O00370	109	2e-42	LINE-1 retrotransposable element ORF2 protein	.	.	.	.	pfam02994	Transposase_22	L1 transposable element.	GO:0006310|DNA recombination;GO:0090305|nucleic acid phosphodiester bond hydrolysis;GO:0032199|reverse transcription involved in RNA-mediated transposition;GO:0032197|transposition, RNA-mediated;	.	GO:0046872|metal ion binding;GO:0003964|RNA-directed DNA polymerase activity;GO:0009036|Type II site-specific deoxyribonuclease activity;	.	.
ENSG00000279412	1.88968	0.918143	0.0226219	up	yes	RP11-394B2.5	TEC	chr16:70713987-70716890:+	.	.	gi|28951168|gb|AC020763.6|	Homo sapiens chromosome 16 clone RP11-394B2, complete sequence	.	.	.	.	.	.	.	.	pfam07569	Hira	TUP1-like enhancer of split. The Hira proteins are found in a range of eukaryotes and are implicated in the assembly of repressive chromatin. These proteins also contain pfam00400.	.	.	.	.	.
ENSG00000279417	2.3286	1.21946	0.0284951	up	yes	RP11-382B18.1	TEC	chr15:30344307-30348236:-	gi|106322|pir||B34087	hypothetical protein (L1H 3' region) - human	gi|24080740|gb|AC010799.15|	Homo sapiens chromosome 15, clone RP11-40J8, complete sequence	O00370	608	0	LINE-1 retrotransposable element ORF2 protein	MTH212	73.6	3e-13	COG0708	pfam02994	Transposase_22	L1 transposable element.	GO:0006310|DNA recombination;GO:0090305|nucleic acid phosphodiester bond hydrolysis;GO:0032199|reverse transcription involved in RNA-mediated transposition;GO:0032197|transposition, RNA-mediated;	.	GO:0046872|metal ion binding;GO:0003964|RNA-directed DNA polymerase activity;GO:0009036|Type II site-specific deoxyribonuclease activity;	.	.
ENSG00000279570	8.72135	3.12455	0.0432719	up	yes	CTD-2357A8.2	TEC	chr17:78691266-78691979:-	.	.	gi|22532758|gb|AC099804.3|	Homo sapiens chromosome 17, clone CTD-2357A8, complete sequence	.	.	.	.	.	.	.	.	pfam11013	DUF2851	Protein of unknown function (DUF2851). This bacterial family of proteins has no known function.	.	.	.	.	.
ENSG00000279720	0.648408	-0.625026	0.0326456	down	yes	bP-2171C21.6	processed_pseudogene	chr21:9082601-9083101:-	gi|686730863|ref|XP_009242934.1|	PREDICTED: LOW QUALITY PROTEIN: ankyrin repeat domain-containing protein SOWAHC-like [Pongo abelii]	gi|302488079|ref|NG_025019.1|	Homo sapiens ankyrin repeat domain 57 pseudogene (LOC100419957) on chromosome 21	Q8C0J6	138	3e-37	Ankyrin repeat domain-containing protein SOWAHC	.	.	.	.	pfam11229	DUF3028	Protein of unknown function (DUF3028). This eukaryotic family of proteins has no known function.	.	.	.	.	.
ENSG00000279953	0.476803	-1.06854	0.0292601	down	yes	RP11-338K17.5	TEC	chr12:123649068-123650485:+	gi|119573656|gb|EAW53271.1|	hCG2041009, partial [Homo sapiens]	gi|23955947|gb|AF548661.1|	Homo sapiens general transcription factor IIH, polypeptide 3, 34kDa (GTF2H3) gene, complete cds	Q6B4Z3	54.7	2e-13	Histone demethylase UTY	.	.	.	.	pfam13900	GVQW	Putative binding domain. This short domain is often found nested inside other longer domains. The function is not known, but the domain carries a highly conserved GVQW motif. The members are rich in proline and cysteine. This may be a binding domain.	GO:0010468|regulation of gene expression;	GO:0005634|nucleus;	GO:0051213|dioxygenase activity;GO:0071558|histone demethylase activity (H3-K27 specific);GO:0046872|metal ion binding;	K11447	UTX, UTY; histone demethylase [EC:1.14.11.-]
ENSG00000279982	2.74468	1.45664	0.0423296	up	yes	RP11-45A17.3	TEC	chr10:131996738-131999846:+	gi|545686822|ref|NP_001270831.1|	uncharacterized protein LOC101925229 precursor [Macaca fascicularis]	gi|12214292|emb|AL162274.17|	Human DNA sequence from clone RP11-45A17 on chromosome 10, complete sequence	Q8N2A0	46.6	6e-13	Putative uncharacterized protein encoded by LINC00269	.	.	.	.	pfam13900	GVQW	Putative binding domain. This short domain is often found nested inside other longer domains. The function is not known, but the domain carries a highly conserved GVQW motif. The members are rich in proline and cysteine. This may be a binding domain.	.	.	.	.	.
ENSG00000280160	2.98715	1.57877	0.0453888	up	yes	RP11-196G11.3	TEC	chr16:31093727-31095944:+	gi|426381960|ref|XP_004057597.1|	PREDICTED: uncharacterized protein LOC101127117 [Gorilla gorilla gorilla]	gi|224922766|ref|NG_011564.1|	Homo sapiens vitamin K epoxide reductase complex, subunit 1 (VKORC1), RefSeqGene on chromosome 16	Q8N2A0	52.4	2e-06	Putative uncharacterized protein encoded by LINC00269	.	.	.	.	pfam13900	GVQW	Putative binding domain. This short domain is often found nested inside other longer domains. The function is not known, but the domain carries a highly conserved GVQW motif. The members are rich in proline and cysteine. This may be a binding domain.	.	.	.	.	.
ENSG00000280278	0.582221	-0.780362	0.00736811	down	yes	FLJ30679	TEC	chr16:86555320-86557299:+	gi|119615823|gb|EAW95417.1|	hCG1980119 [Homo sapiens]	gi|221307589|ref|NR_026674.1|	Homo sapiens uncharacterized protein FLJ30679 (FLJ30679), long non-coding RNA	.	.	.	.	.	.	.	.	pfam13900	GVQW	Putative binding domain. This short domain is often found nested inside other longer domains. The function is not known, but the domain carries a highly conserved GVQW motif. The members are rich in proline and cysteine. This may be a binding domain.	.	.	.	.	.
ENSG00000280355	1.75379	0.810479	0.0295161	up	yes	RP11-119F19.5	TEC	chr10:79681973-79684094:-	gi|296198919|ref|XP_002746938.1|	PREDICTED: BEN domain-containing protein 3 [Callithrix jacchus]	gi|30145825|emb|AL603703.10|	Human DNA sequence from clone RP11-773D16 on chromosome 10 Contains the 3' end of novel gene, a novel gene and a novel pseudogene, complete sequence	Q5T5X7	80.9	1e-123	BEN domain-containing protein 3	.	.	.	.	pfam10523	BEN	BEN domain. The BEN domain is found in diverse animal proteins such as BANP/SMAR1, NAC1 and the Drosophila mod(mdg4) isoform C, in the chordopoxvirus virosomal protein E5R and in several proteins of polydnaviruses. Computational analysis suggests that the BEN domain mediates protein-DNA and protein-protein interactions during chromatin organisation and transcription.	GO:0000183|chromatin silencing at rDNA;GO:0006306|DNA methylation;GO:0098532|histone H3-K27 trimethylation;GO:0080182|histone H3-K4 trimethylation;GO:0036124|histone H3-K9 trimethylation;GO:0043967|histone H4 acetylation;GO:0034773|histone H4-K20 trimethylation;GO:0000122|negative regulation of transcription from RNA polymerase II promoter;GO:0006351|transcription, DNA-templated;	GO:0005720|nuclear heterochromatin;GO:0005730|nucleolus;	GO:0000182|rDNA binding;	.	.
ENSG00000280408	7.33473	2.87474	0.0383267	up	yes	RP11-818O24.2	TEC	chr17:1352070-1352255:+	.	.	gi|219521851|ref|NG_009233.1|	Homo sapiens tyrosine 3-monooxygenase/tryptophan 5-monooxygenase activation protein, epsilon (YWHAE), RefSeqGene on chromosome 17	.	.	.	.	.	.	.	.	pfam02704	GASA	Gibberellin regulated protein. This is the GASA gibberellin regulated cysteine rich protein family. The expression of these proteins is up-regulated by the plant hormone gibberellin, most of these proteins have some role in plant development. There are 12 cysteine residues conserved within the alignment giving the potential for these proteins to posses 6 disulphide bonds.	.	.	.	.	.
ENSG00000280800	0.0774305	-3.69095	0.0167902	down	yes	CH507-513H4.6	lincRNA	chr21:8210384-8211306:-	gi|296473176|tpg|DAA15291.1|	TPA: hypothetical protein BOS_23236 [Bos taurus]	gi|374429547|ref|NR_046235.1|	Homo sapiens RNA, 45S pre-ribosomal 5 (RNA45S5), ribosomal RNA	Q5DU56	72.4	8e-13	Protein NLRC3	.	.	.	.	pfam11847	DUF3367	Domain of unknown function (DUF3367). This domain is functionally uncharacterized. This domain is found in bacteria and archaea. This presumed domain is typically between 667 to 694 amino acids in length.	GO:0007249|I-kappaB kinase/NF-kappaB signaling;GO:0043124|negative regulation of I-kappaB kinase/NF-kappaB signaling;GO:0032691|negative regulation of interleukin-1 beta production;GO:0032695|negative regulation of interleukin-12 production;GO:0032715|negative regulation of interleukin-6 production;GO:0032088|negative regulation of NF-kappaB transcription factor activity;GO:0032720|negative regul…	GO:0005737|cytoplasm;	GO:0005524|ATP binding;	.	.
ENSG00000282870	5.89921	2.56052	0.0422761	up	yes	FRG1DP	unprocessed_pseudogene	chr20:29080390-29102761:+	gi|817276240|ref|XP_012308231.1|	PREDICTED: protein FRG1 [Aotus nancymaae]	gi|158257211|dbj|AK291890.1|	Homo sapiens cDNA FLJ75747 complete cds, highly similar to Homo sapiens FSHD region gene 1 (FRG1), mRNA	Q14331	301	1e-100	Protein FRG1	.	.	.	.	pfam06229	FRG1	FRG1-like family. The human FRG1 gene maps to human chromosome 4q35 and has been identified as a candidate for facioscapulohumeral muscular dystrophy. Currently, the function of FRG1 is unknown.	GO:0000398|mRNA splicing, via spliceosome;GO:0007517|muscle organ development;GO:0006364|rRNA processing;	GO:0015030|Cajal body;GO:0071013|catalytic step 2 spliceosome;GO:0005730|nucleolus;GO:0055120|striated muscle dense body;GO:0030018|Z disc;	GO:0051015|actin filament binding;GO:0044822|poly(A) RNA binding;	K13122	FRG1; protein FRG1
ENSG00000282933	0.273929	-1.86813	0.0309307	down	yes	RHOXF1P3	unprocessed_pseudogene	chrX:119991393-119992543:+	gi|694986083|ref|XP_009437848.1|	PREDICTED: homeobox protein ESX1 [Pan troglodytes]	gi|295821281|gb|AC240732.2|	Homo sapiens BAC clone RP11-651E20 from chromosome x, complete sequence	.	.	.	.	.	.	.	.	pfam00046	Homeobox	Homeobox domain.	.	.	.	.	.
ENSG00000283443	0.378463	-1.40178	0.0388301	down	yes	RP11-462H3.2	unprocessed_pseudogene	chr20:30545601-30551470:+	gi|751130485|ref|NP_001291378.1|	zinc finger protein 806 [Homo sapiens]	gi|18093149|gb|AC018688.9|	Homo sapiens BAC clone RP11-462H3 from UL, complete sequence	P0C7X5	59.3	7e-08	Zinc finger protein 806	.	.	.	.	pfam01352	KRAB	KRAB box. The KRAB domain (or Kruppel-associated box) is present in about a third of zinc finger proteins containing C2H2 fingers. The KRAB domain is found to be involved in protein-protein interactions. The KRAB domain is generally encoded by two exons. The regions coded by the two exons are known as KRAB-A and KRAB-B. The A box plays an important role in repression by binding to corepressors, w…	GO:0006355|regulation of transcription, DNA-templated;GO:0006351|transcription, DNA-templated;	GO:0005634|nucleus;	GO:0003677|DNA binding;GO:0046872|metal ion binding;	K09228	KRAB; KRAB domain-containing zinc finger protein
ENSG00000283597	0.461173	-1.11662	0.0314982	down	yes	FAM169B	transcribed_unprocessed_pseudogene	chr15:98437162-98547728:-	gi|426380446|ref|XP_004056876.1|	PREDICTED: protein FAM169B [Gorilla gorilla gorilla]	gi|110624767|ref|NM_182562.2|	Homo sapiens family with sequence similarity 169, member B (FAM169B), mRNA	Q8CHT6	51.6	2e-06	Protein FAM169B	.	.	.	.	pfam13900	GVQW	Putative binding domain. This short domain is often found nested inside other longer domains. The function is not known, but the domain carries a highly conserved GVQW motif. The members are rich in proline and cysteine. This may be a binding domain.	.	.	.	.	.
ENSG00000283667	0.175648	-2.50924	0.00945213	down	yes	RP11-793J2.1	antisense	chr18:63966406-63970181:-	.	.	gi|6705901|gb|AC009802.13|AC009802	Homo sapiens chromosome 18, clone RP11-793J2, complete sequence	.	.	.	.	.	.	.	.	pfam05410	Peptidase_C31	Porcine arterivirus-type cysteine proteinase alpha. Corresponds to Merops family C31. These peptidases are involved in viral polyprotein processing in replication.	.	.	.	.	.
